# Supplementary material for: RNA-Seq and iTRAQ reveal multiple pathways involved in storage root formation and development in sweet potato (Ipomoea batatas L.)
Source: BMC Plant Biol. 2019 Apr 11;19:136. doi: 10.1186/s12870-019-1731-0 (PMC6458706; doi:10.1186/s12870-019-1731-0)
Supplement: Supplementary file 7 — Table S4. Correlation between transcriptome and proteome. (XLSX 1344 kb) [file 12870_2019_1731_MOESM7_ESM.xlsx]

## Sheet: prot_tran_expr6
Table S4. Correlation between transriptiome and proteome
Gene_id	pro-F	pro-D1	pro-D3	pro-D5	pro-D10	GO_Description	KEGG_Description	COG_Function_Description	RNA-F	RNA-D1	RNA-D3	RNA-D5	RNA-D10	NR Description	NT Description	KO Description	Swissprot Description	PFAM description	BP Description	MF Description	KOG Description
Tai6.999	1.07077	1.84564	1.75756	1.38401	1.43096	Biological Process:iron ion transport (GO:0006826),Biological Process:cellular iron ion homeostasis (GO:0006879),Molecular Function:ferric iron binding (GO:0008199)	ferritin heavy chain	Ferritin	47.8725	162.481	128.106	108.732	78.8269	ferritin precursor family protein [Populus trichocarpa]>gi|222868240|gb|EEF05371.1| ferritin precursor family protein [Populus trichocarpa]	AF133814 Solanum tuberosum ferritin 1 mRNA, partial cds	ferritin heavy chain	Ferritin-3, chloroplastic OS=Glycine max PE=2 SV=1	Rubrerythrin//Ferritin-like domain	single-organism process//response to stress//cellular iron ion homeostasis//response to chemical//oxidation-reduction process	metal ion binding//oxidoreductase activity//ferric iron binding	Ferritin
Tai6.9987	0.983275	0.526132	0.599766	0.943642	0.737751	Molecular Function:FMN binding (GO:0010181),Molecular Function:oxidoreductase activity (GO:0016491)	NAD(P)H dehydrogenase (quinone)	Multimeric flavodoxin WrbA	77.1707	8.7542	8.15952	5.20739	6.68609	PREDICTED: P25 protein-like [Nicotiana sylvestris]	PREDICTED: Brassica rapa minor allergen Alt a 7-like (LOC103851957), mRNA	NAD(P)H dehydrogenase (quinone)	NAD(P)H dehydrogenase (quinone) FQR1 OS=Arabidopsis thaliana GN=FQR1 PE=1 SV=1	Flavodoxin//NADPH-dependent FMN reductase	--	FMN binding//oxidoreductase activity	1,4-benzoquinone reductase-like; Trp repressor binding protein-like/protoplast-secreted protein
Tai6.9985	1.03227	1.15642	1.11069	0.730198	0.873762	Molecular Function:fructose-bisphosphate aldolase activity (GO:0004332),Biological Process:glycolytic process (GO:0006096)	fructose-bisphosphate aldolase, class I	Fructose-bisphosphate aldolase class 1	0.0633069	0	0.0314844	0.174416	0.0961544	PREDICTED: fructose-bisphosphate aldolase cytoplasmic isozyme [Nicotiana tomentosiformis]	PREDICTED: Nicotiana sylvestris fructose-bisphosphate aldolase cytoplasmic isozyme (LOC104236811), mRNA	fructose-bisphosphate aldolase, class I	Fructose-bisphosphate aldolase cytoplasmic isozyme OS=Oryza sativa subsp. japonica GN=FBA PE=1 SV=2	Fructose-bisphosphate aldolase class-I	glycolytic process//inositol metabolic process//fructose metabolic process//carbon utilization//mannose metabolic process//gluconeogenesis//pentose-phosphate shunt	fructose-bisphosphate aldolase activity	Fructose-biphosphate aldolase
Tai6.998	0.981799	0.690848	0.407436	0	0	--	--	--	186.593	123.227	134.176	117.129	117.538	PREDICTED: uncharacterized protein At5g01610-like [Nicotiana tomentosiformis]	PREDICTED: Solanum lycopersicum uncharacterized protein At5g01610 (LOC101248154), mRNA	--	Uncharacterized protein At5g01610 OS=Arabidopsis thaliana GN=At5g01610 PE=1 SV=1	LBP / BPI / CETP family, N-terminal domain	--	lipid binding	--
Tai6.9963	0.901836	0.817239	0.741617	0.753686	0.893033	Biological Process:DNA repair (GO:0006281)	DNA damage-binding protein 1	--	31.9958	52.183	50.1982	65.7675	64.8055	PREDICTED: DNA damage-binding protein 1-like isoform X2 [Solanum tuberosum]	PREDICTED: Solanum tuberosum DNA damage-binding protein 1-like (LOC102579151), transcript variant X2, mRNA	DNA damage-binding protein 1	DNA damage-binding protein 1 OS=Solanum lycopersicum GN=DDB1 PE=1 SV=1	Human herpesvirus U26 protein	--	--	Damage-specific DNA binding complex, subunit DDB1
Tai6.9960	0.898964	0.852225	0.487825	0	0	Molecular Function:nucleic acid binding (GO:0003676)	U2 small nuclear ribonucleoprotein B''	--	0	0	0.129393	0	0	spliceosomal protein [Solanum tuberosum]>gi|169589|gb|AAA33847.1| spliceosomal protein [Solanum tuberosum]	PREDICTED: Nicotiana tomentosiformis U2 small nuclear ribonucleoprotein B'' (LOC104113439), mRNA	U2 small nuclear ribonucleoprotein B''	U2 small nuclear ribonucleoprotein B'' OS=Arabidopsis thaliana GN=U2B'' PE=1 SV=1	RNA recognition motif. (a.k.a. RRM, RBD, or RNP domain)	mRNA splicing, via spliceosome	snRNA binding//nucleotide binding//nucleic acid binding	Spliceosomal protein snRNP-U1A/U2B
Tai6.9948	1.07279	0.839248	0.802452	0.838256	0.790717	Biological Process:glycolipid biosynthetic process (GO:0009247)	1,2-diacylglycerol 3-beta-galactosyltransferase	UDP-N-acetylglucosamine:LPS N-acetylglucosamine transferase	8.69222	12.9127	13.2705	9.01101	10.7625	PREDICTED: probable monogalactosyldiacylglycerol synthase, chloroplastic [Nicotiana sylvestris]>gi|75173454|sp|Q9FZL3.1|MGDG_TOBAC RecName: Full=Probable monogalactosyldiacylglycerol synthase, chloroplastic; Short=NtMGD1; AltName: Full=MGDG synthase type A; Flags: Precursor [Nicotiana tabacum]>gi|9884653|dbj|BAB11980.1| MGDG synthase type A [Nicotiana tabacum]	PREDICTED: Gossypium raimondii monogalactosyldiacylglycerol synthase, chloroplastic-like (LOC105773757), transcript variant X2, mRNA	1,2-diacylglycerol 3-beta-galactosyltransferase	Probable monogalactosyldiacylglycerol synthase, chloroplastic OS=Nicotiana tabacum GN=MGD A PE=2 SV=1	Glycosyltransferase family 28 C-terminal domain//Monogalactosyldiacylglycerol (MGDG) synthase	glycerolipid metabolic process//lipid glycosylation//glycolipid biosynthetic process	1,2-diacylglycerol 3-beta-galactosyltransferase activity//carbohydrate binding//transferase activity, transferring hexosyl groups	--
Tai6.9946	1.05366	0.742007	0.428135	0	0	Molecular Function:zinc ion binding (GO:0008270)	NAD+ diphosphatase	--	7.24859	14.0811	11.0594	9.40507	14.6159	PREDICTED: zinc finger Ran-binding domain-containing protein 2-like [Gossypium raimondii]>gi|823230582|ref|XP_012448016.1| PREDICTED: zinc finger Ran-binding domain-containing protein 2-like [Gossypium raimondii]>gi|728817839|gb|KHG02597.1| putative RNA-binding C17H9.04c [Gossypium arboreum]>gi|763786899|gb|KJB53895.1| hypothetical protein B456_009G010300 [Gossypium raimondii]>gi|763786900|gb|KJB…	PREDICTED: Nicotiana sylvestris TATA-binding protein-associated factor 2N (LOC104211318), transcript variant X1, mRNA	--	Uncharacterized RNA-binding protein C17H9.04c OS=Schizosaccharomyces pombe (strain 972 / ATCC 24843) GN=SPAC17H9.04c PE=1 SV=1	Fibronectin-attachment protein (FAP)//Zn-finger in Ran binding protein and others	--	extracellular matrix binding//zinc ion binding	RNA-binding Ran Zn-finger protein and related proteins
Tai6.9927	0.993789	1.05556	1.05847	1.13605	1.11661	Molecular Function:protein kinase activity (GO:0004672),Molecular Function:ATP binding (GO:0005524),Biological Process:protein phosphorylation (GO:0006468)	mitogen-activated protein kinase 6	PASTA domain, binds beta-lactams	41.7748	46.7582	45.3553	39.7736	40.1376	PREDICTED: mitogen-activated protein kinase homolog MMK1-like [Pyrus x bretschneideri]	N.tabacum mRNA for p45Ntf4	mitogen-activated protein kinase 6	Mitogen-activated protein kinase homolog NTF4 OS=Nicotiana tabacum GN=NTF4 PE=2 SV=1	Protein tyrosine kinase//Protein kinase domain//Lipopolysaccharide kinase (Kdo/WaaP) family	protein phosphorylation	protein kinase activity//ATP binding//phosphotransferase activity, alcohol group as acceptor	--
Tai6.9926	0.841453	0.938884	0.974017	1.35606	1.28535	Biological Process:metabolic process (GO:0008152)	pathogen-inducible salicylic acid glucosyltransferase	UDP:flavonoid glycosyltransferase YjiC, YdhE family	25.2244	0.607881	1.73675	0.713901	1.07816	PREDICTED: LOW QUALITY PROTEIN: UDP-glycosyltransferase 74F2-like [Nicotiana tomentosiformis]	--	pathogen-inducible salicylic acid glucosyltransferase	UDP-glycosyltransferase 74F2 OS=Arabidopsis thaliana GN=UGT74F2 PE=1 SV=1	Glycosyltransferase family 28 C-terminal domain//UDP-glucoronosyl and UDP-glucosyl transferase	metabolic process	transferase activity, transferring hexosyl groups	--
Tai6.9925	1.07804	0.75631	0.48651	0	0	--	--	--	16.0817	39.7159	49.9731	58.723	43.4009	PREDICTED: protein GLUTAMINE DUMPER 2-like [Sesamum indicum]	PREDICTED: Erythranthe guttatus protein GLUTAMINE DUMPER 2-like (LOC105952277), mRNA	--	Protein GLUTAMINE DUMPER 3 OS=Arabidopsis thaliana GN=GDU3 PE=2 SV=1	Fumarate reductase subunit D	fumarate metabolic process	--	--
Tai6.992	0.861884	1.15346	1.31688	1.73373	1.45996	--	--	--	12.1972	11.3144	13.4817	14.2187	15.5622	PREDICTED: uncharacterized protein LOC104116065 [Nicotiana tomentosiformis]>gi|697142055|ref|XP_009625144.1| PREDICTED: uncharacterized protein LOC104116065 [Nicotiana tomentosiformis]	--	--	--	--	--	--	--
Tai6.9907	0.87963	0.619883	0.831103	1.3289	1.18138	--	dynactin 5	Carbonic anhydrase or acetyltransferase, isoleucine patch superfamily	83.6884	91.4369	86.8494	70.3436	73.7977	PREDICTED: gamma carbonic anhydrase 1, mitochondrial-like [Nicotiana tomentosiformis]	Solanum lycopersicum cDNA, clone: LEFL1031AE03, HTC in leaf	--	Gamma carbonic anhydrase 2, mitochondrial OS=Arabidopsis thaliana GN=GAMMACA2 PE=1 SV=1	L-fucokinase	--	transferase activity, transferring phosphorus-containing groups	Serine O-acetyltransferase
Tai6.9889	1.00225	0.809885	0.434709	0	0	--	5'-nucleotidase	Chromosome segregation ATPase	1.86268	6.57649	9.22738	6.12603	7.63552	PREDICTED: 5'-nucleotidase domain-containing protein DDB_G0275467 isoform X3 [Solanum lycopersicum]	PREDICTED: Solanum lycopersicum 5'-nucleotidase domain-containing protein DDB_G0275467 (LOC101256784), transcript variant X3, mRNA	--	5'-nucleotidase domain-containing protein DDB_G0275467 OS=Dictyostelium discoideum GN=DDB_G0275467 PE=3 SV=1	--	--	--	IMP-GMP specific 5'-nucleotidase
Tai6.9888	0.817723	0.65634	0.447166	0	0	--	putative hydrolases of HD superfamily	5'-deoxynucleotidase YfbR and related HD superfamily hydrolases	0	0.0930937	0	0	0	PREDICTED: HD domain-containing protein 2 homolog [Nicotiana tomentosiformis]>gi|697098324|ref|XP_009626150.1| PREDICTED: HD domain-containing protein 2 homolog [Nicotiana tomentosiformis]	PREDICTED: Setaria italica HD domain-containing protein 2-like (LOC101762598), mRNA	putative hydrolases of HD superfamily	HD domain-containing protein 2 OS=Danio rerio GN=hddc2 PE=2 SV=1	--	--	--	Predicted hydrolases of HD superfamily
Tai6.9884	0.979853	1.23443	1.47613	0.52764	1.02714	Cellular Component:integral component of membrane (GO:0016021)	tetraspanin-5	--	10.3681	44.1668	46.4216	30.2753	43.3921	PREDICTED: tetraspanin-8-like [Nicotiana tomentosiformis]	PREDICTED: Musa acuminata subsp. malaccensis tetraspanin-8-like (LOC103992287), mRNA	--	Tetraspanin-8 OS=Arabidopsis thaliana GN=TET8 PE=2 SV=1	Citrate transporter//Tetraspanin family	transmembrane transport	--	--
Tai6.9878	0.910751	0.491548	0.400721	0	0	--	--	--	0.482744	1.27113	2.03074	1.78598	1.22843	PREDICTED: uncharacterized protein LOC102604646 [Solanum tuberosum]	PREDICTED: Fragaria vesca subsp. vesca uncharacterized LOC101293582 (LOC101293582), mRNA	--	--	--	--	--	--
Tai6.9860	1.00677	0.82391	0.800993	0.801165	0.808652	Cellular Component:integral component of membrane (GO:0016021),Biological Process:vesicle-mediated transport (GO:0016192)	vesicle-associated membrane protein 7	--	37.8647	33.4284	33.3223	26.3435	28.8908	PREDICTED: vesicle-associated membrane protein 711 [Nicotiana tomentosiformis]	PREDICTED: Nicotiana tomentosiformis vesicle-associated membrane protein 711 (LOC104105063), mRNA	vesicle-associated membrane protein 7	Vesicle-associated membrane protein 711 OS=Arabidopsis thaliana GN=VAMP711 PE=1 SV=2	Intracellular growth attenuator protein IgaA//Synaptobrevin//Granin (chromogranin or secretogranin)//Triple QxxK/R motif-containing protein family	vesicle-mediated transport	--	Synaptobrevin/VAMP-like protein
Tai6.9857	0.93274	1.08473	0.620178	0	0	--	ribonuclease H2 subunit B	--	0.0281468	0.23167	0.0270102	0.0928771	0.0592058	PREDICTED: uncharacterized protein LOC104117579 [Nicotiana tomentosiformis]	--	--	--	F-box-like	--	protein binding	--
Tai6.9840	1.02866	0.744626	0.519633	0	0	Biological Process:protein peptidyl-prolyl isomerization (GO:0000413),Molecular Function:peptidyl-prolyl cis-trans isomerase activity (GO:0003755),Biological Process:protein folding (GO:0006457)	--	Peptidyl-prolyl cis-trans isomerase (rotamase) - cyclophilin family	56.0844	60.3939	62.1313	61.289	62.6663	unnamed protein product [Coffea canephora]	Ipomoea batatas cultivar Beauregard clone BAC117E14, complete sequence	--	Peptidyl-prolyl cis-trans isomerase CYP23 OS=Arabidopsis thaliana GN=CYP23 PE=2 SV=1	Cyclophilin type peptidyl-prolyl cis-trans isomerase/CLD	protein folding//protein peptidyl-prolyl isomerization	peptidyl-prolyl cis-trans isomerase activity	--
Tai6.9833	0.687842	0.816029	0.317851	0	0	Molecular Function:ADP binding (GO:0043531)	disease resistance protein RPM1	--	0.792408	0.742961	0.55892	0.54028	0.466717	NBS-LRR protein [Ipomoea batatas]	Ipomoea batatas cultivar Beauregard clone BAC117E14, complete sequence	--	Putative late blight resistance protein homolog R1B-17 OS=Solanum demissum GN=R1B-17 PE=3 SV=1	IstB-like ATP binding protein//NB-ARC domain//Leucine rich repeat	--	ADP binding//protein binding//ATP binding	--
Tai6.9828	1.03656	0.946311	0.915827	0.726986	0.614099	Cellular Component:mitochondrial outer membrane (GO:0005741),Biological Process:transmembrane transport (GO:0055085)	voltage-dependent anion channel protein 2	--	64.3517	69.6707	90.5363	67.5447	67.0789	PREDICTED: mitochondrial outer membrane protein porin of 36 kDa [Nicotiana sylvestris]>gi|161788874|dbj|BAF95071.1| voltage-dependent anion channel [Nicotiana tabacum]	S.tuberosum pPOM36I mRNA for 36kDA porinI	voltage-dependent anion channel protein 2	Mitochondrial outer membrane protein porin of 36 kDa OS=Solanum tuberosum PE=1 SV=2	Eukaryotic porin	regulation of anion transport//anion transport//transmembrane transport	voltage-gated anion channel activity	Porin/voltage-dependent anion-selective channel protein
Tai6.9820	1.54473	0.99547	0.479804	0	0	--	5'-3' exoribonuclease 2	--	0.1497	0.0310117	0.378078	0.157594	0.11214	PREDICTED: FRIGIDA-like protein 4a [Solanum lycopersicum]	--	--	FRIGIDA-like protein 4a OS=Arabidopsis thaliana GN=FRL4A PE=2 SV=1	Baculovirus polyhedron envelope protein, PEP, C terminus//Nepovirus coat protein, N-terminal domain	--	structural molecule activity	--
Tai6.9807	1.18042	0.711032	0.475007	0	0	Molecular Function:FAD binding (GO:0071949)	salicylate hydroxylase	2-polyprenyl-6-methoxyphenol hydroxylase and related FAD-dependent oxidoreductases	0.170102	0	0.139137	0.112258	0	PREDICTED: zeaxanthin epoxidase, chloroplastic-like [Nicotiana tomentosiformis]	--	--	--	FAD dependent oxidoreductase//Pyridine nucleotide-disulphide oxidoreductase//Pyridine nucleotide-disulphide oxidoreductase//FAD dependent oxidoreductase//SAWADEE domain//FAD binding domain	oxidation-reduction process	chromatin binding//oxidoreductase activity//FAD binding	--
Tai6.9796	1.06109	1.05609	1.25348	1.3512	1.28802	--	programmed cell death protein 4	--	49.3484	52.7088	56.9984	67.9977	59.8435	unnamed protein product [Coffea canephora]	PREDICTED: Nicotiana tomentosiformis uncharacterized LOC104106342 (LOC104106342), mRNA	--	Programmed cell death protein 4 OS=Mus musculus GN=Pdcd4 PE=1 SV=1	Helical and beta-bridge domain	--	--	Neoplastic transformation suppressor Pdcd4/MA-3, contains MA3 domain
Tai6.9795	0.519072	0.722367	0.492414	0	0	--	riboflavin kinase	Beta-phosphoglucomutase or related phosphatase, HAD superfamily	0.149622	0	0	0.0357056	0	PREDICTED: haloacid dehalogenase-like hydrolase domain-containing protein At3g48420 [Vitis vinifera]>gi|731424890|ref|XP_010663056.1| PREDICTED: haloacid dehalogenase-like hydrolase domain-containing protein At3g48420 [Vitis vinifera]>gi|297733644|emb|CBI14891.3| unnamed protein product [Vitis vinifera]	PREDICTED: Solanum tuberosum haloacid dehalogenase-like hydrolase domain-containing protein At3g48420-like (LOC102605195), mRNA	--	Haloacid dehalogenase-like hydrolase domain-containing protein At3g48420 OS=Arabidopsis thaliana GN=At3g48420 PE=1 SV=1	Zinc-binding dehydrogenase//Homeobox KN domain	oxidation-reduction process//regulation of transcription, DNA-templated	hydrolase activity//DNA binding	--
Tai6.9794	1.05314	1.0981	0.821256	0	0	Molecular Function:nuclease activity (GO:0004518),Biological Process:DNA repair (GO:0006281)	AP endonuclease 1	Exonuclease III	4.57585	3.93133	3.406	2.38715	3.49801	PREDICTED: DNA-(apurinic or apyrimidinic site) lyase [Nicotiana tomentosiformis]	PREDICTED: Jatropha curcas DNA-(apurinic or apyrimidinic site) lyase (LOC105640261), mRNA	--	DNA-(apurinic or apyrimidinic site) lyase OS=Arabidopsis thaliana GN=APE1L PE=1 SV=1	--	--	--	Apurinic/apyrimidinic endonuclease and related enzymes
Tai6.9770	0.333333	0	0.41358	1.47884	1.30159	Molecular Function:ketol-acid reductoisomerase activity (GO:0004455),Biological Process:branched-chain amino acid biosynthetic process (GO:0009082),Molecular Function:oxidoreductase activity (GO:0016491),Biological Process:oxidation-reduction process (GO:0055114)	ketol-acid reductoisomerase	Ketol-acid reductoisomerase	51.678	52.0711	74.3972	84.8591	67.1023	PREDICTED: ketol-acid reductoisomerase, chloroplastic-like isoform X2 [Nelumbo nucifera]	PREDICTED: Solanum lycopersicum ketol-acid reductoisomerase, chloroplastic (LOC101261134), mRNA	ketol-acid reductoisomerase	Ketol-acid reductoisomerase, chloroplastic OS=Arabidopsis thaliana GN=At3g58610 PE=2 SV=2	Acetohydroxy acid isomeroreductase, catalytic domain	valine biosynthetic process//oxidation-reduction process//leucine biosynthetic process//isoleucine biosynthetic process//pantothenate biosynthetic process//branched-chain amino acid biosynthetic process	ketol-acid reductoisomerase activity	--
Tai6.9758	0.815396	1.26308	0.911809	0	0	Molecular Function:hydrolase activity (GO:0016787)	lysophospholipase II	Predicted esterase	0	0.0818404	0.239655	0.213531	0.0980579	PREDICTED: acyl-protein thioesterase 2-like [Nicotiana sylvestris]>gi|698568769|ref|XP_009774145.1| PREDICTED: acyl-protein thioesterase 2-like [Nicotiana sylvestris]	PREDICTED: Nicotiana sylvestris acyl-protein thioesterase 2-like (LOC104224237), transcript variant X2, mRNA	lysophospholipase II	Acyl-protein thioesterase 2 OS=Rattus norvegicus GN=Lypla2 PE=1 SV=1	Prolyl oligopeptidase family//Interleukin 23 subunit alpha//Dienelactone hydrolase family//Esterase PHB depolymerase//Secretory lipase//Lipase (class 3)//Thioesterase domain//Synaptobrevin//Phospholipase/Carboxylesterase	proteolysis//immune response//vesicle-mediated transport//lipid catabolic process//signal transduction//glycerolipid metabolic process//biosynthetic process//lipid metabolic process	triglyceride lipase activity//hydrolase activity, acting on ester bonds//cytokine activity//hydrolase activity//serine-type peptidase activity	Lysophospholipase
Tai6.9752	1.16683	0.88	0.870293	0.894009	0.9149	Molecular Function:protein kinase activity (GO:0004672),Molecular Function:ATP binding (GO:0005524),Biological Process:protein phosphorylation (GO:0006468)	interleukin-1 receptor-associated kinase 1	PASTA domain, binds beta-lactams	9.73156	11.3917	9.89693	26.0398	17.234	PREDICTED: proline-rich receptor-like protein kinase PERK1 isoform X1 [Nicotiana tomentosiformis]	Nicotiana tabacum NtPERK1 mRNA for PERK1-like protein kinase, complete cds	--	Proline-rich receptor-like protein kinase PERK1 OS=Arabidopsis thaliana GN=PERK1 PE=2 SV=1	Protein kinase domain//Protein tyrosine kinase	protein phosphorylation	ATP binding//protein kinase activity	--
Tai6.969	0.333333	0	0.228807	0.834568	0.79808	Molecular Function:nucleotide binding (GO:0000166),Molecular Function:nucleic acid binding (GO:0003676),Molecular Function:alanine-tRNA ligase activity (GO:0004813),Molecular Function:ATP binding (GO:0005524),Biological Process:alanyl-tRNA aminoacylation (GO:0006419),Biological Process:tRNA aminoacylation (GO:0043039)	alanyl-tRNA synthetase	Ser-tRNA(Ala) deacylase AlaX (editing enzyme)	18.0826	10.2287	9.93334	8.24377	7.41398	PREDICTED: putative alanyl-tRNA editing protein alaX [Erythranthe guttatus]>gi|604347300|gb|EYU45552.1| hypothetical protein MIMGU_mgv1a012367mg [Erythranthe guttata]	--	--	Alanine--tRNA ligase OS=Methanosarcina acetivorans (strain ATCC 35395 / DSM 2834 / JCM 12185 / C2A) GN=alaS PE=3 SV=1	Threonyl and Alanyl tRNA synthetase second additional domain//tRNA synthetases class II (A)	tRNA aminoacylation//aspartate metabolic process//alanyl-tRNA aminoacylation//alanine metabolic process	ligase activity, forming aminoacyl-tRNA and related compounds//nucleotide binding//ATP binding//alanine-tRNA ligase activity	--
Tai6.9688	0.971444	2.17683	1.84219	3.69689	2.28152	Molecular Function:GTPase activity (GO:0003924),Molecular Function:GTP binding (GO:0005525)	elongation factor 1-alpha	Translation elongation factor EF-1alpha (GTPase)	1187.4	1132.82	1695.04	1856.75	1251.55	elongation factor 1-alpha [Phaseolus vulgaris]	Ipomoea nil EF1a mRNA for elongation factor 1-alpha, complete cds, cultivar: Violet	elongation factor 1-alpha	Elongation factor 1-alpha OS=Glycine max GN=TEFS1 PE=3 SV=2	Elongation factor Tu domain 2//50S ribosome-binding GTPase//Methyl-viologen-reducing hydrogenase, delta subunit	oxidation-reduction process//methanogenesis	GTP binding	Translation elongation factor EF-1 alpha/Tu
Tai6.9686	1.16698	0.774583	0.532468	0	0	Cellular Component:Sec61 translocon complex (GO:0005784),Biological Process:intracellular protein transport (GO:0006886)	protein transport protein SEC61 subunit beta	--	45.1874	18.6046	16.2048	24.504	26.7367	PREDICTED: protein transport protein Sec61 subunit beta-like [Nelumbo nucifera]	PREDICTED: Phoenix dactylifera protein transport protein Sec61 subunit beta-like (LOC103709701), transcript variant X4, misc_RNA	protein transport protein SEC61 subunit beta	Protein transport protein Sec61 subunit beta OS=Arabidopsis thaliana GN=At2g45070 PE=1 SV=1	--	--	--	Sec61 protein translocation complex, beta subunit
Tai6.9678	0.333333	0	0.395921	1.00387	1.07947	Molecular Function:serine-type endopeptidase activity (GO:0004252),Biological Process:proteolysis (GO:0006508)	golgi-specific brefeldin A-resistance guanine nucleotide exchange factor 1	Serine protease, subtilisin family	0.044739	0.40632	0.135601	0.197505	0.212992	PREDICTED: LOW QUALITY PROTEIN: subtilisin-like protease SBT5.3, partial [Nelumbo nucifera]	PREDICTED: Nicotiana tomentosiformis subtilisin-like protease SBT5.3 (LOC104088653), mRNA	--	Subtilisin-like protease SBT5.4 OS=Arabidopsis thaliana GN=SBT5.4 PE=1 SV=1	Subtilase family	proteolysis	serine-type endopeptidase activity	--
Tai6.9668	0.934402	0.845058	0.817342	0.409656	0.520706	Molecular Function:ATP-dependent peptidase activity (GO:0004176),Molecular Function:serine-type endopeptidase activity (GO:0004252),Molecular Function:ATP binding (GO:0005524),Biological Process:protein catabolic process (GO:0030163)	Lon-like ATP-dependent protease	ATP-dependent Lon protease, bacterial type	11.3997	15.8226	21.7281	18.9053	16.2909	PREDICTED: lon protease homolog, mitochondrial-like [Solanum tuberosum]	PREDICTED: Solanum lycopersicum lon protease homolog 1, mitochondrial-like (LOC101264562), mRNA	Lon-like ATP-dependent protease	Lon protease homolog 1, mitochondrial OS=Arabidopsis thaliana GN=LON1 PE=1 SV=2	DnaB-like helicase C terminal domain//NB-ARC domain//AAA domain (Cdc48 subfamily)//RNA helicase//AAA domain (dynein-related subfamily)//ATPase family associated with various cellular activities (AAA)//Protein of unknown function, DUF258//Cytidylate kinase//Chloramphenicol phosphotransferase-like protein//NTPase//Threonylcarbamoyl adenosine biosynthesis protein TsaE//IstB-like ATP binding protein/…	pyrimidine nucleobase metabolic process//DNA repair//nucleobase-containing compound metabolic process//DNA recombination//DNA replication//tRNA threonylcarbamoyladenosine modification	GTP binding//nucleotide phosphatase activity, acting on free nucleotides//ATPase activity//cytidylate kinase activity//ATP binding//transferase activity//RNA helicase activity//ADP binding//DNA helicase activity//four-way junction helicase activity//RNA binding//GTPase activity	Mitochondrial ATP-dependent protease PIM1/LON
Tai6.9665	0.935191	0.561296	0.316338	0	0	Molecular Function:ATP binding (GO:0005524),Molecular Function:ATPase activity (GO:0016887)	ATP-binding cassette, subfamily C (CFTR/MRP), member 1	ABC-type multidrug transport system, ATPase and permease component	9.66829	7.19624	8.81943	5.2598	8.08373	PREDICTED: ABC transporter C family member 4-like [Sesamum indicum]	PREDICTED: Nicotiana tomentosiformis ABC transporter C family member 14-like (LOC104109466), transcript variant X3, mRNA	--	ABC transporter C family member 14 OS=Arabidopsis thaliana GN=ABCC14 PE=1 SV=1	50S ribosome-binding GTPase//AAA domain, putative AbiEii toxin, Type IV TA system//FtsK/SpoIIIE family//DEAD/DEAH box helicase//ABC transporter//Type II/IV secretion system protein	transport	GTP binding//ATP binding//ATPase activity//nucleic acid binding//nucleotide binding//DNA binding	--
Tai6.9660	1.09591	0.657822	0.457159	0	0	Molecular Function:ATP binding (GO:0005524),Biological Process:protein folding (GO:0006457),Molecular Function:unfolded protein binding (GO:0051082)	ATP-dependent Clp protease ATP-binding subunit ClpX	ATP-dependent protease Clp, ATPase subunit	0.180546	0.0635438	0.0304189	0.175406	0.150809	PREDICTED: ATP-dependent Clp protease ATP-binding subunit clpX-like, mitochondrial-like [Solanum tuberosum]	PREDICTED: Vitis vinifera ATP-dependent Clp protease ATP-binding subunit clpX-like, mitochondrial (LOC100264001), transcript variant X1, mRNA >gnl|BL_ORD_ID|26524373 PREDICTED: Vitis vinifera ATP-dependent Clp protease ATP-binding subunit clpX-like, mitochondrial (LOC100264001), transcript variant X2, mRNA	ATP-dependent Clp protease ATP-binding subunit ClpX	ATP-dependent Clp protease ATP-binding subunit ClpX OS=Chelativorans sp. (strain BNC1) GN=clpX PE=3 SV=1	Popeye protein conserved region//AAA domain (Cdc48 subfamily)//ATPase family associated with various cellular activities (AAA)	--	ATP binding	Putative ATP-dependent Clp-type protease (AAA+ ATPase superfamily)
Tai6.9642	0.838608	0.837468	0.60479	0	0	Biological Process:carbohydrate metabolic process (GO:0005975)	alpha-galactosidase	Alpha-galactosidase	0.278573	2.1243	0.746339	1.24342	1.15301	PREDICTED: alpha-galactosidase [Nicotiana sylvestris]	--	alpha-galactosidase	Alpha-galactosidase 1 OS=Arabidopsis thaliana GN=AGAL1 PE=2 SV=1	Melibiase//Alpha galactosidase A	carbohydrate metabolic process//globoside metabolic process//glycerolipid metabolic process//galactose metabolic process	alpha-galactosidase activity//hydrolase activity, hydrolyzing O-glycosyl compounds	Alpha-D-galactosidase (melibiase)
Tai6.9632	0.98835	0.560628	0.353067	0	0	Molecular Function:transcription cofactor activity (GO:0003712),Molecular Function:histone acetyltransferase activity (GO:0004402),Molecular Function:protein binding (GO:0005515),Cellular Component:nucleus (GO:0005634),Molecular Function:zinc ion binding (GO:0008270)	E1A/CREB-binding protein	--	50.522	41.2904	36.3875	51.9948	46.577	PREDICTED: histone acetyltransferase HAC1-like isoform X1 [Solanum lycopersicum]	PREDICTED: Solanum lycopersicum histone acetyltransferase HAC1-like (LOC101246749), transcript variant X4, mRNA	E1A/CREB-binding protein	Histone acetyltransferase HAC12 OS=Arabidopsis thaliana GN=HAC12 PE=2 SV=2	PHD-finger//KIX domain//TAZ zinc finger//HRDC domain	regulation of transcription, DNA-templated//acyl-carrier-protein biosynthetic process	zinc ion binding//nucleic acid binding//histone acetyltransferase activity//protein binding//transcription cofactor activity	CREB binding protein/P300 and related TAZ Zn-finger proteins
Tai6.9612	0.98764	1.43381	1.1516	1.25118	1.17649	Molecular Function:structural molecule activity (GO:0005198),Biological Process:intracellular protein transport (GO:0006886),Biological Process:vesicle-mediated transport (GO:0016192),Cellular Component:clathrin coat of trans-Golgi network vesicle (GO:0030130),Cellular Component:clathrin coat of coated pit (GO:0030132)	clathrin light chain B	--	38.7058	53.0768	61.0941	47.4229	46.7465	PREDICTED: clathrin light chain 2-like [Sesamum indicum]	PREDICTED: Solanum tuberosum clathrin light chain 1-like (LOC102601027), mRNA	--	Clathrin light chain 1 OS=Arabidopsis thaliana GN=At2g20760 PE=2 SV=1	Clathrin light chain	vesicle-mediated transport//intracellular protein transport	structural molecule activity	--
Tai6.9608	1.2394	1.23623	1.10699	1.29122	1.5102	Molecular Function:protein binding (GO:0005515),Cellular Component:membrane (GO:0016020)	syntaxin 7	--	65.1348	79.1416	72.8008	65.1971	67.7032	PREDICTED: syntaxin-22 [Nicotiana tomentosiformis]	PREDICTED: Solanum tuberosum syntaxin-22-like (LOC102584384), mRNA	syntaxin 7	Syntaxin-22 OS=Arabidopsis thaliana GN=SYP22 PE=1 SV=1	SNARE domain//Synaptobrevin//Syntaxin//Prominin//Methyl-accepting chemotaxis protein (MCP) signalling domain//Vesicle transport v-SNARE protein N-terminus	vesicle-mediated transport//intracellular protein transport//signal transduction	protein binding//signal transducer activity	SNARE protein PEP12/VAM3/Syntaxin 7/Syntaxin 17
Tai6.9596	1.00686	2.34568	2.4479	0.905088	1.05773	--	TBC1 domain family member 9	--	0	0.0465988	0	0.0915429	0.0238895	unnamed protein product [Coffea canephora]	PREDICTED: Solanum lycopersicum TBC1 domain family member 8B (LOC101256081), mRNA	--	--	V-type ATPase 116kDa subunit family//Nucleopolyhedrovirus P10 protein//CorA-like Mg2+ transporter protein//DASH complex subunit Spc34//Nodulation protein Z (NodZ)	proton transport//attachment of spindle microtubules to kinetochore//transmembrane transport//metal ion transport//nodulation//oligosaccharide biosynthetic process//ATP hydrolysis coupled proton transport	metal ion transmembrane transporter activity//hydrogen ion transmembrane transporter activity//transferase activity, transferring hexosyl groups	--
Tai6.959	1.05645	0.999332	0.868068	0.739153	0.717458	Biological Process:metabolic process (GO:0008152)	pyruvate dehydrogenase E1 component alpha subunit	TPP-dependent pyruvate or acetoin dehydrogenase subunit alpha	116.61	124.458	138.119	139.65	133.695	PREDICTED: pyruvate dehydrogenase E1 component subunit alpha, mitochondrial-like [Nicotiana sylvestris]	Ipomoea batatas pyruvate dehydrogenase E1 alpha subunit (PDHE1-A) mRNA, partial cds	pyruvate dehydrogenase E1 component alpha subunit	Pyruvate dehydrogenase E1 component subunit alpha, mitochondrial OS=Solanum tuberosum PE=1 SV=1	Dehydrogenase E1 component//Thiamine pyrophosphate enzyme, C-terminal TPP binding domain//1-deoxy-D-xylulose-5-phosphate synthase	terpenoid biosynthetic process//steroid biosynthetic process//metabolic process	catalytic activity//oxidoreductase activity, acting on the aldehyde or oxo group of donors, disulfide as acceptor//1-deoxy-D-xylulose-5-phosphate synthase activity//thiamine pyrophosphate binding	Pyruvate dehydrogenase E1, alpha subunit
Tai6.9584	0.562126	1.45442	0.799718	0	0	--	solute carrier family 25 (mitochondrial S-adenosylmethionine transporter), member 26	--	31.0845	21.5617	30.0252	29.2841	34.249	Mitochondrial substrate carrier family protein isoform 3 [Theobroma cacao]>gi|508726655|gb|EOY18552.1| Mitochondrial substrate carrier family protein isoform 3 [Theobroma cacao]	PREDICTED: Cicer arietinum mitochondrial substrate carrier family protein C (LOC101507700), mRNA	--	S-adenosylmethionine mitochondrial carrier protein OS=Danio rerio GN=slc25a26 PE=2 SV=1	--	--	--	Mitochondrial carrier protein PET8
Tai6.9579	0.333333	0	0.353989	2.61966	2.39031	Molecular Function:translation initiation factor activity (GO:0003743),Biological Process:translational initiation (GO:0006413)	translation initiation factor IF-3	Translation initiation factor IF-3	25.9076	27.7975	47.8902	44.5164	34.965	PREDICTED: translation initiation factor IF-3, chloroplastic [Sesamum indicum]	PREDICTED: Glycine max translation initiation factor IF-3, chloroplastic-like (LOC100791411), transcript variant 1, mRNA	translation initiation factor IF-3	Translation initiation factor IF-3 OS=Nostoc sp. (strain PCC 7120 / UTEX 2576) GN=infC PE=3 SV=1	Translation initiation factor IF-3, C-terminal domain//Translation initiation factor IF-3, N-terminal domain	translational initiation//regulation of translational initiation	translation initiation factor activity	--
Tai6.9572	0.777778	0.758072	0.670945	0.740556	0.841389	Molecular Function:nucleic acid binding (GO:0003676)	heterogeneous nuclear ribonucleoprotein A1/A3	RNA recognition motif (RRM) domain	48.2757	49.2587	44.4022	39.5082	39.5275	PREDICTED: heterogeneous nuclear ribonucleoprotein A3 homolog 2-like [Solanum tuberosum]	--	heterogeneous nuclear ribonucleoprotein A1/A3	UBP1-associated protein 2C OS=Arabidopsis thaliana GN=UBA2C PE=2 SV=1	RNA recognition motif. (a.k.a. RRM, RBD, or RNP domain)//RNA recognition motif	--	nucleic acid binding	--
Tai6.9570	0.889635	1.13013	1.32373	1.28669	1.05195	Molecular Function:oxidoreductase activity (GO:0016491),Biological Process:oxidation-reduction process (GO:0055114)	malate dehydrogenase	Malate/lactate dehydrogenase	82.8706	117.713	140.636	133.641	117.886	putative mitochondrial NAD-dependent malate dehydrogenase [Solanum tuberosum]>gi|21388548|emb|CAD33242.1| putative mitochondrial NAD-dependent malate dehydrogenase [Solanum tuberosum]	PREDICTED: Nicotiana tomentosiformis malate dehydrogenase 2, mitochondrial (LOC104104732), mRNA	malate dehydrogenase	Malate dehydrogenase, mitochondrial OS=Citrullus lanatus GN=MMDH PE=1 SV=1	lactate/malate dehydrogenase, alpha/beta C-terminal domain//3-beta hydroxysteroid dehydrogenase/isomerase family//Dihydrodipicolinate reductase, N-terminus//lactate/malate dehydrogenase, NAD binding domain//Family 4 glycosyl hydrolase	cellular carbohydrate metabolic process//reductive tricarboxylic acid cycle//oxidation-reduction process//steroid biosynthetic process//carbohydrate metabolic process//lysine biosynthetic process via diaminopimelate//androgen metabolic process//tricarboxylic acid cycle//lysine biosynthetic process//C21-steroid hormone metabolic process//pyruvate metabolic process//estrogen metabolic process//glyo…	oxidoreductase activity, acting on the CH-OH group of donors, NAD or NADP as acceptor//hydrolase activity, hydrolyzing O-glycosyl compounds//oxidoreductase activity//nucleotide binding//3-beta-hydroxy-delta5-steroid dehydrogenase activity//4-hydroxy-tetrahydrodipicolinate reductase//L-malate dehydrogenase activity	NAD-dependent malate dehydrogenase
Tai6.9561	0.819017	1.26052	0.749028	0	0	Cellular Component:exocyst (GO:0000145),Biological Process:exocytosis (GO:0006887)	exocyst complex component 7	--	60.2768	46.9862	52.1662	65.7895	55.0182	PREDICTED: exocyst complex component EXO70A1-like [Nicotiana sylvestris]	PREDICTED: Camelina sativa exocyst complex component EXO70A1 (LOC104734375), mRNA	exocyst complex component 7	Exocyst complex component EXO70A1 OS=Arabidopsis thaliana GN=EXO70A1 PE=1 SV=1	--	--	--	--
Tai6.9558	0.969792	1.11458	1.07488	1.10576	1.09664	--	serine/threonine-protein phosphatase 2A regulatory subunit A	Predicted NTPase, NACHT family domain	121.676	144.674	142.332	134.762	128.588	PREDICTED: serine/threonine-protein phosphatase 2A 65 kDa regulatory subunit A beta isoform-like [Solanum tuberosum]	PREDICTED: Nicotiana tomentosiformis serine/threonine-protein phosphatase 2A 65 kDa regulatory subunit A beta isoform-like (LOC104113471), transcript variant X2, mRNA	serine/threonine-protein phosphatase 2A regulatory subunit A	Serine/threonine-protein phosphatase 2A 65 kDa regulatory subunit A beta isoform OS=Arabidopsis thaliana GN=PP2AA2 PE=1 SV=2	HEAT repeat//Armadillo/beta-catenin-like repeat//Adaptin N terminal region//TAF6 C-terminal HEAT repeat domain	vesicle-mediated transport//regulation of sequence-specific DNA binding transcription factor activity//intracellular protein transport	protein binding	Protein phosphatase 2A regulatory subunit A and related proteins
Tai6.9542	0.983987	0.989216	0.944071	0.935542	0.815876	Cellular Component:histone acetyltransferase complex (GO:0000123),Molecular Function:protein binding (GO:0005515),Cellular Component:nucleus (GO:0005634),Biological Process:histone acetylation (GO:0016573)	transformation/transcription domain-associated protein	--	54.9408	47.0084	51.9585	59.1276	61.665	PREDICTED: transformation/transcription domain-associated protein-like isoform X1 [Nicotiana sylvestris]	PREDICTED: Nicotiana sylvestris transformation/transcription domain-associated protein-like (LOC104219503), transcript variant X2, mRNA	transformation/transcription domain-associated protein	Transcription-associated protein 1 OS=Saccharomyces cerevisiae (strain ATCC 204508 / S288c) GN=TRA1 PE=1 SV=1	TPR repeat//FAT domain	--	protein binding	Histone acetyltransferase SAGA, TRRAP/TRA1 component, PI-3 kinase superfamily
Tai6.9538	1.08787	1.14156	0.832419	0.848204	0.790685	Cellular Component:histone acetyltransferase complex (GO:0000123),Cellular Component:nucleus (GO:0005634),Biological Process:histone acetylation (GO:0016573)	transformation/transcription domain-associated protein	--	33.218	32.6648	36.0466	41.851	44.1515	PREDICTED: probable transcription-associated protein 1 isoform X1 [Nicotiana tomentosiformis]	PREDICTED: Nicotiana tomentosiformis probable transcription-associated protein 1 (LOC104096908), transcript variant X2, mRNA	transformation/transcription domain-associated protein	Transcription-associated protein 1 OS=Drosophila melanogaster GN=Nipped-A PE=1 SV=3	--	--	--	Histone acetyltransferase SAGA, TRRAP/TRA1 component, PI-3 kinase superfamily
Tai6.9537	1.05586	1.17758	1.15444	1.07582	1.09304	Biological Process:RNA processing (GO:0006396)	small nuclear ribonucleoprotein D3	--	51.4759	55.2358	63.3698	51.6089	55.0754	PREDICTED: small nuclear ribonucleoprotein Sm D3-like [Solanum lycopersicum]>gi|565347418|ref|XP_006340724.1| PREDICTED: small nuclear ribonucleoprotein Sm D3-like [Solanum tuberosum]	PREDICTED: Nicotiana sylvestris small nuclear ribonucleoprotein Sm D3-like (LOC104215804), mRNA	small nuclear ribonucleoprotein D3	Small nuclear ribonucleoprotein SmD3b OS=Arabidopsis thaliana GN=SMD3B PE=2 SV=1	Alcohol dehydrogenase GroES-like domain	oxidation-reduction process	--	Small nuclear ribonucleoprotein Sm D3
Tai6.9534	1.11537	0.666111	0.66036	0.577396	0.568066	Molecular Function:molybdate ion transmembrane transporter activity (GO:0015098),Biological Process:molybdate ion transport (GO:0015689),Cellular Component:integral component of membrane (GO:0016021)	--	--	6.98343	15.5838	19.0147	9.0892	11.7711	PREDICTED: molybdate-anion transporter-like [Nicotiana sylvestris]	PREDICTED: Nicotiana tomentosiformis molybdate-anion transporter-like (LOC104119692), mRNA	--	Molybdate-anion transporter OS=Pongo abelii GN=MFSD5 PE=2 SV=1	Major Facilitator Superfamily//Sugar-tranasporters, 12 TM	transmembrane transport//molybdate ion transport	molybdate ion transmembrane transporter activity	Predicted sugar transporter
Tai6.9519	0.960373	1.36946	1.19639	1.16511	1.19938	Molecular Function:protein binding (GO:0005515)	guanine nucleotide-binding protein subunit beta-2-like 1 protein	WD40 repeat	552.591	574.684	885.586	695.471	674.259	PREDICTED: guanine nucleotide-binding protein subunit beta-like protein [Nicotiana sylvestris]	Lotus japonicus genomic DNA, chromosome 4, clone: LjT63K02, TM2002, complete sequence	guanine nucleotide-binding protein subunit beta-2-like 1 protein	Guanine nucleotide-binding protein subunit beta-like protein OS=Nicotiana tabacum GN=ARCA PE=2 SV=1	WD domain, G-beta repeat	--	protein binding	G protein beta subunit-like protein
Tai6.9518	0.688012	0.329532	0.152047	0	0	Cellular Component:exocyst (GO:0000145),Biological Process:exocytosis (GO:0006887)	exocyst complex component 8	--	1.78151	3.13403	4.53069	4.81989	4.53049	PREDICTED: exocyst complex component EXO84B [Nicotiana tomentosiformis]	PREDICTED: Nicotiana sylvestris exocyst complex component EXO84B (LOC104220586), mRNA	--	Exocyst complex component EXO84B OS=Arabidopsis thaliana GN=EXO84B PE=1 SV=1	--	--	--	Exocyst complex subunit
Tai6.9513	0.333333	0	0.373362	0.932678	1.27147	--	chaperonin GroEL	Chaperonin GroEL (HSP60 family)	0	0	0	0.0293109	0.0231868	PREDICTED: chaperonin CPN60-2, mitochondrial [Sesamum indicum]	PREDICTED: Nicotiana tomentosiformis chaperonin CPN60-2, mitochondrial-like (LOC104095538), mRNA	chaperonin GroEL	Chaperonin CPN60-2, mitochondrial OS=Cucurbita maxima GN=CPN60-2 PE=1 SV=1	TCP-1/cpn60 chaperonin family	--	ATP binding	Mitochondrial chaperonin, Cpn60/Hsp60p
Tai6.9500	0.998246	1.0993	0.963259	0.559894	0.617692	Molecular Function:double-stranded RNA binding (GO:0003725)	--	tRNA A37 threonylcarbamoyladenosine synthetase subunit TsaC/SUA5/YrdC	0.375655	0.597228	0.42225	0.397813	0.342209	PREDICTED: yrdC domain-containing protein, mitochondrial isoform X2 [Nicotiana sylvestris]	PREDICTED: Nicotiana tomentosiformis yrdC domain-containing protein, mitochondrial (LOC104089034), mRNA	--	YrdC domain-containing protein, mitochondrial OS=Bos taurus GN=YRDC PE=2 SV=1	Telomere recombination	--	double-stranded RNA binding	RNA binding/translational regulation protein of the SUA5 family
Tai6.9495	0.333333	0	0.499308	1.4426	1.41263	--	--	--	0.0443877	0.941826	0.729403	0.176719	0.288143	--	--	--	--	--	--	--	--
Tai6.9491	1.02783	1.01643	0.966016	0.880689	0.918204	Molecular Function:phosphomannomutase activity (GO:0004615),Cellular Component:cytoplasm (GO:0005737),Biological Process:GDP-mannose biosynthetic process (GO:0009298)	phosphomannomutase	Hydroxymethylpyrimidine pyrophosphatase and other HAD family phosphatases	28.3086	45.1313	57.9464	40.8578	49.3483	Phosphomannomutase [Theobroma cacao]>gi|508704135|gb|EOX96031.1| Phosphomannomutase [Theobroma cacao]	PREDICTED: Nelumbo nucifera phosphomannomutase (LOC104596126), mRNA	phosphomannomutase	Phosphomannomutase OS=Glycine max PE=2 SV=1	Eukaryotic phosphomannomutase	mannose metabolic process//GDP-mannose biosynthetic process//fructose metabolic process	phosphomannomutase activity	Phosphomannomutase
Tai6.9489	1.07799	1.34006	0.986842	0.631142	0.643368	Molecular Function:protein binding (GO:0005515)	suppressor of tumorigenicity protein 13	Tetratricopeptide (TPR) repeat	79.8275	137.97	92.1339	69.939	94.2577	unnamed protein product [Coffea canephora]	PREDICTED: Solanum lycopersicum FAM10 family protein At4g22670 (LOC101268416), transcript variant X1, mRNA	suppressor of tumorigenicity protein 13	FAM10 family protein At4g22670 OS=Arabidopsis thaliana GN=At4g22670 PE=1 SV=1	Tetratricopeptide repeat//TPR repeat//Tetratricopeptide repeat//Tetratricopeptide repeat	--	protein binding	Hsp70-interacting protein Hip/Transient component of progesterone receptor complexes and an Hsp70-binding protein
Tai6.9488	1.07868	0.859615	0.673196	0	0	Biological Process:intracellular protein transport (GO:0006886),Biological Process:vesicle-mediated transport (GO:0016192),Cellular Component:membrane coat (GO:0030117)	AP-1 complex subunit beta-1	--	70.3449	67.5549	70.942	72.8227	81.0628	unnamed protein product [Coffea canephora]	PREDICTED: Solanum lycopersicum beta-adaptin-like protein C (LOC101252011), mRNA	AP-1 complex subunit beta-1	Beta-adaptin-like protein B OS=Arabidopsis thaliana GN=BETAB-AD PE=1 SV=1	Adaptin N terminal region	intracellular protein transport//vesicle-mediated transport	--	Vesicle coat complex AP-1/AP-2/AP-4, beta subunit
Tai6.9482	1.18803	0.817898	0.488619	0	0	Biological Process:acyl-CoA metabolic process (GO:0006637),Molecular Function:acyl-CoA hydrolase activity (GO:0047617)	acyl-coenzyme A thioesterase 1/2/4	Acyl-CoA thioesterase	1.85211	3.41199	2.37027	1.52059	1.96457	PREDICTED: acyl-coenzyme A thioesterase 8-like isoform X2 [Nicotiana sylvestris]	PREDICTED: Nicotiana sylvestris acyl-coenzyme A thioesterase 8-like (LOC104243361), transcript variant X2, mRNA	acyl-coenzyme A thioesterase 1/2/4	Acyl-coenzyme A thioesterase 8 OS=Mus musculus GN=Acot8 PE=1 SV=1	--	--	--	Acyl-CoA thioesterase
Tai6.9478	1.03208	1.04742	0.710251	0	0	Biological Process:fatty acid biosynthetic process (GO:0006633),Molecular Function:thiolester hydrolase activity (GO:0016790)	fatty acyl-ACP thioesterase A	Acyl-ACP thioesterase	0.0605259	0	0.0885817	0	0.132908	unnamed protein product [Coffea canephora]	Capsicum frutescens acyl-ACP thioesterase (FAT) mRNA, complete cds	fatty acyl-ACP thioesterase A	Oleoyl-acyl carrier protein thioesterase, chloroplastic (Fragment) OS=Coriandrum sativum GN=FATA PE=2 SV=1	Acyl-ACP thioesterase	fatty acid biosynthetic process	thiolester hydrolase activity	--
Tai6.9476	1.09893	1.12367	0.821537	0	0	--	--	--	91.7295	85.5772	104.086	72.3185	67.6118	PREDICTED: wound-induced basic protein [Erythranthe guttatus]	PREDICTED: Erythranthe guttatus wound-induced basic protein (LOC105955982), mRNA	--	Wound-induced basic protein OS=Phaseolus vulgaris GN=PR4 PE=2 SV=1	--	--	--	--
Tai6.9450	0.483173	0.146795	0.0465923	0	0	--	ribulose-bisphosphate carboxylase small chain	Ribulose bisphosphate carboxylase small subunit	61.8119	7.26083	2.00243	0.556398	0	ribulose 1,5-bisphosphate carboxylase/oxygenase small subunit (rbcS) [Ipomoea batatas]	Ipomoea batatas rbcS1 mRNA for ribulose 1,5-bisphosphate carboxylase/oxygenase small subunit (rbcS), complete cds	ribulose-bisphosphate carboxylase small chain	Ribulose bisphosphate carboxylase small chain 1, chloroplastic OS=Solanum tuberosum GN=RBCS-1 PE=3 SV=1	--	--	--	--
Tai6.9440	0.980769	1.20739	0.828054	0	0	Molecular Function:triose-phosphate isomerase activity (GO:0004807),Biological Process:metabolic process (GO:0008152)	triosephosphate isomerase (TIM)	Triosephosphate isomerase	11.5828	20.8798	21.8125	14.0354	14.6757	PREDICTED: triosephosphate isomerase, chloroplastic [Beta vulgaris subsp. vulgaris]>gi|870849195|gb|KMT01458.1| hypothetical protein BVRB_9g214650 [Beta vulgaris subsp. vulgaris]	PREDICTED: Cicer arietinum triosephosphate isomerase, chloroplastic (LOC101508638), mRNA	triosephosphate isomerase (TIM)	Triosephosphate isomerase, chloroplastic OS=Spinacia oleracea GN=TPIP1 PE=1 SV=1	Triosephosphate isomerase	glycerolipid metabolic process//metabolic process//glycolytic process//carbon utilization//mannose metabolic process//inositol metabolic process//fructose metabolic process//gluconeogenesis	triose-phosphate isomerase activity	Triosephosphate isomerase
Tai6.943	1.03286	0.998645	0.904548	0.518166	0.612379	Molecular Function:oxidoreductase activity (GO:0016491),Biological Process:oxidation-reduction process (GO:0055114)	--	NADH:ubiquinone oxidoreductase 24 kD subunit (chain E)	93.0648	114.79	97.4962	89.9046	96.2584	PREDICTED: NADH dehydrogenase [ubiquinone] flavoprotein 2, mitochondrial [Erythranthe guttatus]>gi|604348357|gb|EYU46512.1| hypothetical protein MIMGU_mgv1a012296mg [Erythranthe guttata]>gi|604348358|gb|EYU46513.1| hypothetical protein MIMGU_mgv1a012296mg [Erythranthe guttata]	PREDICTED: Nicotiana sylvestris NADH dehydrogenase [ubiquinone] flavoprotein 2, mitochondrial (LOC104235390), mRNA	NADH dehydrogenase (ubiquinone) flavoprotein 2	NADH dehydrogenase [ubiquinone] flavoprotein 2, mitochondrial OS=Arabidopsis thaliana GN=At4g02580 PE=2 SV=3	D domain of beta-TrCP	--	protein dimerization activity	NADH:ubiquinone oxidoreductase, NDUFV2/24 kD subunit
Tai6.9420	1.06537	1.09636	0.88051	1.00905	1.12317	Molecular Function:sulfate adenylyltransferase (ATP) activity (GO:0004781)	--	ATP sulfurylase (sulfate adenylyltransferase)	407.042	90.8172	118.337	43.8316	79.6319	unnamed protein product [Coffea canephora]	PREDICTED: Nicotiana tomentosiformis ATP sulfurylase 1, chloroplastic-like (LOC104118011), mRNA	3'-phosphoadenosine 5'-phosphosulfate synthase	ATP sulfurylase 1, chloroplastic OS=Arabidopsis thaliana GN=APS1 PE=1 SV=1	ATP-sulfurylase	purine nucleobase metabolic process//sulfur compound metabolic process	sulfate adenylyltransferase (ATP) activity	Bifunctional ATP sulfurylase/adenosine 5'-phosphosulfate kinase
Tai6.9400	0.948056	0.941864	1.19028	0.922972	1.14247	Molecular Function:ATP binding (GO:0005524),Molecular Function:kinase activity (GO:0016301),Biological Process:phosphorylation (GO:0016310)	alpha-glucan, water dikinase	Phosphohistidine swiveling domain of PEP-utilizing enzymes	29.2472	63.8221	151.201	146.24	224.842	PREDICTED: alpha-glucan water dikinase, chloroplastic isoform X2 [Nicotiana sylvestris]	PREDICTED: Nicotiana sylvestris alpha-glucan water dikinase, chloroplastic (LOC104225269), transcript variant X3, mRNA	alpha-glucan, water dikinase	Alpha-glucan water dikinase, chloroplastic OS=Solanum tuberosum GN=R1 PE=1 SV=2	Pyruvate phosphate dikinase, PEP/pyruvate binding domain//Skp1 family, dimerisation domain	phosphorylation//ubiquitin-dependent protein catabolic process	ATP binding//kinase activity	--
Tai6.9397	1.08547	1.21665	1.27481	1.82286	2.02693	Molecular Function:nucleic acid binding (GO:0003676)	nucleolysin TIA-1/TIAR	RNA recognition motif (RRM) domain	0.0999727	0.0818009	0.0994387	0.137717	0	oligouridylate binding protein-like protein [Solanum tuberosum]>gi|82400162|gb|ABB72820.1| oligouridylate binding protein-like protein [Solanum tuberosum]	Solanum tuberosum oligouridylate binding protein-like protein (LOC102577639), mRNA >gnl|BL_ORD_ID|776342 Solanum tuberosum clone 180D07 oligouridylate binding protein-like protein mRNA, complete cds	nucleolysin TIA-1/TIAR	Oligouridylate-binding protein 1B OS=Arabidopsis thaliana GN=UBP1B PE=1 SV=1	RNA recognition motif//RNA recognition motif. (a.k.a. RRM, RBD, or RNP domain)	--	nucleic acid binding//nucleotide binding	--
Tai6.9396	1.05419	1.16405	1.06066	1.261	1.02545	Molecular Function:FMN binding (GO:0010181),Molecular Function:oxidoreductase activity (GO:0016491),Biological Process:oxidation-reduction process (GO:0055114)	(S)-2-hydroxy-acid oxidase	FMN-dependent dehydrogenase, includes L-lactate dehydrogenase and type II isopentenyl diphosphate isomerase	0.785098	0.682108	0.586174	0.529145	0.24914	PREDICTED: peroxisomal (S)-2-hydroxy-acid oxidase GLO4-like [Solanum tuberosum]	PREDICTED: Nicotiana tomentosiformis peroxisomal (S)-2-hydroxy-acid oxidase GLO4-like (LOC104091381), transcript variant X1, mRNA	(S)-2-hydroxy-acid oxidase	Peroxisomal (S)-2-hydroxy-acid oxidase GLO4 OS=Arabidopsis thaliana GN=GLO4 PE=2 SV=1	FMN-dependent dehydrogenase//Dihydroorotate dehydrogenase//IMP dehydrogenase / GMP reductase domain//Conserved region in glutamate synthase//Histidine biosynthesis protein//Nitronate monooxygenase	histidine biosynthetic process//oxidation-reduction process//nitrogen compound metabolic process//glutamate biosynthetic process	oxidoreductase activity, acting on the CH-CH group of donors//oxidoreductase activity, acting on the CH-NH2 group of donors//nitronate monooxygenase activity//glutamate synthase activity//oxidoreductase activity//catalytic activity	Glycolate oxidase
Tai6.939	0.974633	0.490877	0.314864	0	0	Molecular Function:GTPase activity (GO:0003924),Molecular Function:GTP binding (GO:0005525)	--	--	33.6325	23.2403	16.4404	15.1051	14.1155	PREDICTED: guanylate-binding protein 4-like [Nicotiana sylvestris]	PREDICTED: Nicotiana tomentosiformis guanylate-binding protein 4-like (LOC104092464), mRNA	--	--	Guanylate-binding protein, C-terminal domain//Bromodomain	--	GTPase activity//protein binding//GTP binding	--
Tai6.9384	0.994987	1.53968	1.13775	1.47409	1.31606	Molecular Function:enzyme inhibitor activity (GO:0004857),Cellular Component:cell wall (GO:0005618),Molecular Function:pectinesterase activity (GO:0030599),Biological Process:cell wall modification (GO:0042545)	pectinesterase	Pectin methylesterase and related acyl-CoA thioesterases	0	0.30756	0.065147	0.221392	0.434677	pectin methylesterase [Gossypium hirsutum]	PREDICTED: Glycine max pectinesterase/pectinesterase inhibitor 3-like (LOC100776623), mRNA	pectinesterase	Pectinesterase/pectinesterase inhibitor U1 OS=Solanum lycopersicum GN=PMEU1 PE=2 SV=1	Pectinesterase	starch metabolic process//cell wall modification//sucrose metabolic process	pectinesterase activity	--
Tai6.9360	1.06144	1.01624	0.747175	0	0	Molecular Function:structural constituent of ribosome (GO:0003735),Cellular Component:intracellular (GO:0005622),Cellular Component:ribosome (GO:0005840),Biological Process:translation (GO:0006412)	small subunit ribosomal protein S17e	Ribosomal protein S17E	220.433	158.146	268.709	318.908	259.42	PREDICTED: 40S ribosomal protein S17-like [Nicotiana sylvestris]	Camellia sinensis clone U10BCDNA 2400 40S ribosomal protein s17 mRNA, complete cds	small subunit ribosomal protein S17e	40S ribosomal protein S17 OS=Solanum lycopersicum GN=RPS17 PE=2 SV=3	Ribosomal S17	ribosome biogenesis//translation	structural constituent of ribosome	40S ribosomal protein S17
Tai6.9346	0.924658	1.23973	1.66954	0.810078	0.613372	Molecular Function:structural constituent of ribosome (GO:0003735),Cellular Component:intracellular (GO:0005622),Cellular Component:ribosome (GO:0005840),Biological Process:translation (GO:0006412)	small subunit ribosomal protein S28e	Ribosomal protein S28E/S33	66.1473	57.9133	83.5365	65.1496	56.2137	unnamed protein product [Coffea canephora]	PREDICTED: Vitis vinifera 40S ribosomal protein S28 (LOC100246987), transcript variant X2, mRNA	small subunit ribosomal protein S28e	40S ribosomal protein S28 OS=Zea mays GN=RPS28 PE=3 SV=1	Ribosomal protein S28e	ribosome biogenesis//translation	structural constituent of ribosome	40S ribosomal protein S28
Tai6.9339	0.333333	0	0.23767	0.652788	0.758612	Molecular Function:protein kinase activity (GO:0004672),Molecular Function:ATP binding (GO:0005524),Biological Process:protein phosphorylation (GO:0006468)	interleukin-1 receptor-associated kinase 4	Serine/threonine protein kinase	0.296994	0.209412	0.177321	0.198593	0.299976	PREDICTED: probable serine/threonine-protein kinase At1g18390 isoform X1 [Prunus mume]	PREDICTED: Nicotiana sylvestris probable serine/threonine-protein kinase At1g18390 (LOC104247981), transcript variant X2, mRNA	--	Probable serine/threonine-protein kinase At1g18390 OS=Arabidopsis thaliana GN=At1g18390 PE=2 SV=2	Lipopolysaccharide kinase (Kdo/WaaP) family//Protein kinase domain//Protein tyrosine kinase	protein phosphorylation	phosphotransferase activity, alcohol group as acceptor//protein kinase activity//ATP binding	--
Tai6.9321	1.04631	0.857404	0.762056	1.6698	0.90549	Molecular Function:structural constituent of ribosome (GO:0003735),Cellular Component:ribosome (GO:0005840),Biological Process:translation (GO:0006412)	small subunit ribosomal protein S20e	Ribosomal protein S10	0.645974	0	0.350453	0.0862837	0.296637	PREDICTED: 40S ribosomal protein S20-1 [Jatropha curcas]>gi|643706264|gb|KDP22396.1| hypothetical protein JCGZ_26227 [Jatropha curcas]	PREDICTED: Nicotiana tomentosiformis 40S ribosomal protein S20-2-like (LOC104102722), transcript variant X2, mRNA	small subunit ribosomal protein S20e	40S ribosomal protein S20-1 OS=Arabidopsis thaliana GN=RPS20A PE=2 SV=2	--	--	--	40S ribosomal protein S20
Tai6.9313	0.333333	0	0.376556	0.994122	1.06224	Biological Process:mRNA processing (GO:0006397)	pre-mRNA-splicing factor SPF27	--	4.17753	2.92074	2.42342	3.76303	3.39473	PREDICTED: pre-mRNA-splicing factor SPF27 homolog [Nicotiana tomentosiformis]>gi|697111612|ref|XP_009609684.1| PREDICTED: pre-mRNA-splicing factor SPF27 homolog [Nicotiana tomentosiformis]>gi|697111614|ref|XP_009609685.1| PREDICTED: pre-mRNA-splicing factor SPF27 homolog [Nicotiana tomentosiformis]	PREDICTED: Prunus mume pre-mRNA-splicing factor SPF27 homolog (LOC103338727), transcript variant X3, misc_RNA	pre-mRNA-splicing factor SPF27	Pre-mRNA-splicing factor SPF27 homolog OS=Arabidopsis thaliana GN=MOS4 PE=1 SV=1	Spectrin repeat//Breast carcinoma amplified sequence 2 (BCAS2)//Tho complex subunit 7//Exonuclease VII, large subunit//cGMP-dependent protein kinase interacting domain//Lipoprotein leucine-zipper	DNA catabolic process//mRNA processing	exodeoxyribonuclease VII activity//protein kinase binding//protein binding	Spliceosome-associated coiled-coil protein
Tai6.9301	0.886792	0.742424	0.657804	0	0	--	cullin 1	--	66.2887	62.8401	69.9907	69.294	59.5559	PREDICTED: cullin-1-like [Setaria italica]	--	--	--	--	--	--	--
Tai6.9284	0.333333	0	0.373862	1.75091	1.18488	--	--	Predicted dehydrogenase	27.5851	47.1723	46.5633	73.9538	48.2973	PREDICTED: uncharacterized oxidoreductase At4g09670-like [Nicotiana tomentosiformis]	PREDICTED: Prunus mume uncharacterized oxidoreductase At4g09670 (LOC103336151), mRNA	--	Uncharacterized oxidoreductase At4g09670 OS=Arabidopsis thaliana GN=At4g09670 PE=1 SV=1	Oxidoreductase family, NAD-binding Rossmann fold	--	oxidoreductase activity	Dimeric dihydrodiol dehydrogenase
Tai6.9283	1.01599	1.09915	1.06416	0.983601	1.02443	--	nonsense-mediated mRNA decay protein 3	--	4.44941	17.2162	22.2737	30.627	20.6784	PREDICTED: uncharacterized protein LOC103338780 [Prunus mume]>gi|645220437|ref|XP_008240266.1| PREDICTED: uncharacterized protein LOC103338780 [Prunus mume]	PREDICTED: Nicotiana tomentosiformis uncharacterized LOC104103210 (LOC104103210), mRNA	--	Protein RETICULATA OS=Arabidopsis thaliana GN=RE PE=1 SV=1	--	--	--	--
Tai6.9275	1.03055	1.01799	0.950607	0.77649	0.813742	Biological Process:carbohydrate metabolic process (GO:0005975)	phosphomannomutase	Phosphomannomutase	0.65125	1.16394	1.08519	1.09531	1.14276	PREDICTED: uncharacterized protein LOC101259144 isoform X1 [Solanum lycopersicum]	PREDICTED: Solanum lycopersicum uncharacterized LOC101259144 (LOC101259144), transcript variant X1, mRNA	--	Phosphoglucomutase OS=Neisseria gonorrhoeae GN=pgm PE=3 SV=1	Acetyltransferase (GNAT) domain//Phosphoglucomutase/phosphomannomutase, alpha/beta/alpha domain III//Phosphoglucomutase/phosphomannomutase, C-terminal domain//Acetyltransferase (GNAT) domain//Acetyltransferase (GNAT) family//Acetyltransferase (GNAT) domain//CUE domain//FR47-like protein//Phosphoglucomutase/phosphomannomutase, alpha/beta/alpha domain II//Phosphoglucomutase/phosphomannomutase, alph…	acyl-carrier-protein biosynthetic process//organic substance metabolic process//carbohydrate metabolic process	protein binding//intramolecular transferase activity, phosphotransferases//transferase activity, transferring acyl groups other than amino-acyl groups//N-acetyltransferase activity	--
Tai6.9261	0.96328	1.35292	1.12928	0.503708	0.54274	Molecular Function:cytochrome-c oxidase activity (GO:0004129),Cellular Component:mitochondrion (GO:0005739)	cytochrome c oxidase subunit 6b	--	52.6879	49.734	55.5485	46.0141	50.3857	PREDICTED: cytochrome c oxidase subunit 6b-1-like [Nicotiana tomentosiformis]	PREDICTED: Nelumbo nucifera cytochrome c oxidase subunit 6b-1-like (LOC104604437), mRNA	cytochrome c oxidase subunit 6b	Cytochrome c oxidase subunit 6b-1 OS=Arabidopsis thaliana GN=COX6B-1 PE=1 SV=1	Peptide hormone//SRP54-type protein, helical bundle domain//Cytochrome oxidase c subunit VIb	SRP-dependent cotranslational protein targeting to membrane//mitochondrial electron transport, cytochrome c to oxygen//proton transport//signal transduction	GTP binding//hormone activity//cytochrome-c oxidase activity	Cytochrome c oxidase, subunit VIb/COX12
Tai6.9256	1.13507	0.816892	1.34863	11.3506	1.40933	Biological Process:protein transport (GO:0015031)	vacuolar protein sorting-associated protein IST1	--	0.21592	0.279601	0.357196	0.347634	0.637482	PREDICTED: uncharacterized protein LOC102585287 [Solanum tuberosum]	PREDICTED: Solanum tuberosum uncharacterized LOC102585287 (LOC102585287), mRNA	vacuolar protein sorting-associated protein IST1	IST1-like protein OS=Dictyostelium discoideum GN=DDB_G0289029 PE=3 SV=1	--	--	--	Spindle pole body protein
Tai6.9247	0.951414	0.382119	0.259458	0	0	Molecular Function:metallocarboxypeptidase activity (GO:0004181),Biological Process:proteolysis (GO:0006508),Molecular Function:zinc ion binding (GO:0008270)	carboxypeptidase D	Bacillopeptidase F, M6 metalloprotease family	0.281646	0.385611	0.675126	0.480598	0.849945	PREDICTED: carboxypeptidase D isoform X3 [Nicotiana sylvestris]	PREDICTED: Vitis vinifera carboxypeptidase D (LOC100249088), transcript variant X2, mRNA	carboxypeptidase D	Carboxypeptidase D OS=Homo sapiens GN=CPD PE=1 SV=2	Ankyrin repeat//Zinc carboxypeptidase//Succinylglutamate desuccinylase / Aspartoacylase family	proteolysis//metabolic process	zinc ion binding//metallocarboxypeptidase activity//protein binding//hydrolase activity, acting on ester bonds	Zinc carboxypeptidase
Tai6.9233	0.694072	1.04167	0.501678	0	0	Biological Process:protein deubiquitination (GO:0016579),Molecular Function:thiol-dependent ubiquitinyl hydrolase activity (GO:0036459)	ubiquitin carboxyl-terminal hydrolase 4/11/15	--	0.546303	0.508993	0.28459	0.562487	0.198795	PREDICTED: ubiquitin carboxyl-terminal hydrolase 8-like [Sesamum indicum]	PREDICTED: Phoenix dactylifera ubiquitin carboxyl-terminal hydrolase 8-like (LOC103714421), mRNA	ubiquitin carboxyl-terminal hydrolase 4/11/15	Ubiquitin carboxyl-terminal hydrolase 8 OS=Arabidopsis thaliana GN=UBP8 PE=2 SV=2	Ubiquitin carboxyl-terminal hydrolase	protein deubiquitination	ubiquitinyl hydrolase activity	Ubiquitin C-terminal hydrolase
Tai6.9183	1.07029	0.673256	0.713284	0.734817	0.870294	Molecular Function:ATP binding (GO:0005524)	vacuolar protein-sorting-associated protein 4	ATP-dependent 26S proteasome regulatory subunit	0.0671298	0.442865	0.268476	0.202395	0.511039	PREDICTED: vacuolar protein sorting-associated protein 4-like isoform X1 [Nicotiana tomentosiformis]	PREDICTED: Nicotiana tomentosiformis vacuolar protein sorting-associated protein 4-like (LOC104093735), transcript variant X1, mRNA	vacuolar protein-sorting-associated protein 4	Protein SUPPRESSOR OF K(+) TRANSPORT GROWTH DEFECT 1 OS=Arabidopsis thaliana GN=SKD1 PE=1 SV=1	PhoH-like protein//Parvovirus non-structural protein NS1//ATPase family associated with various cellular activities (AAA)//Torsin//RNA helicase//AAA domain (Cdc48 subfamily)//AAA domain (dynein-related subfamily)//AAA domain, putative AbiEii toxin, Type IV TA system//Archaeal ATPase//TIP49 C-terminus//Holliday junction DNA helicase ruvB N-terminus//IstB-like ATP binding protein//Sigma-54 interact…	DNA repair//regulation of transcription, DNA-templated//viral genome replication//DNA recombination	DNA helicase activity//RNA helicase activity//ATP binding//RNA binding//ATPase activity//transcription factor binding//four-way junction helicase activity	AAA+-type ATPase
Tai6.9179	0.946805	1.04732	1.12432	0.953327	0.880795	Molecular Function:nucleic acid binding (GO:0003676),Molecular Function:ATP binding (GO:0005524)	ATP-dependent RNA helicase DDX21	Superfamily II DNA and RNA helicase	27.8121	38.8404	88.9259	76.1478	53.3193	PREDICTED: DEAD-box ATP-dependent RNA helicase 3, chloroplastic isoform X2 [Nicotiana tomentosiformis]	PREDICTED: Solanum lycopersicum DEAD-box ATP-dependent RNA helicase 3, chloroplastic (LOC101263737), mRNA	--	DEAD-box ATP-dependent RNA helicase 3, chloroplastic OS=Oryza sativa subsp. japonica GN=Os03g0827700 PE=2 SV=2	GUCT (NUC152) domain//SNF2 family N-terminal domain//Type III restriction enzyme, res subunit//DEAD/DEAH box helicase	--	ATP binding//DNA binding//hydrolase activity//helicase activity//RNA binding//nucleic acid binding	ATP-dependent RNA helicase
Tai6.9173	1.06754	1.54298	0.897807	0	0	Molecular Function:ATP binding (GO:0005524),Molecular Function:ATPase activity (GO:0016887)	mitochondrial ABC transporter ATM	ABC-type transport system involved in Fe-S cluster assembly, permease and ATPase components	22.7831	27.4309	27.9385	30.0736	27.0929	PREDICTED: ABC transporter B family member 25, mitochondrial [Nicotiana tomentosiformis]	PREDICTED: Erythranthe guttatus ABC transporter B family member 25, mitochondrial (LOC105963892), mRNA	mitochondrial ABC transporter ATM	ABC transporter B family member 23, mitochondrial OS=Arabidopsis thaliana GN=ABCB23 PE=2 SV=1	ABC transporter//Flavocytochrome c sulphide dehydrogenase, flavin-binding	oxidation-reduction process	ATPase activity//ATP binding//oxidoreductase activity//flavin adenine dinucleotide binding	Heavy metal exporter HMT1, ABC superfamily
Tai6.9167	1.01699	0.646231	0.459926	0	0	Molecular Function:serine-type carboxypeptidase activity (GO:0004185),Biological Process:proteolysis (GO:0006508)	serine carboxypeptidase-like clade II	--	2.55989	1.26748	0.60694	0.137337	0.805026	PREDICTED: serine carboxypeptidase-like 42 [Erythranthe guttatus]>gi|604297147|gb|EYU17411.1| hypothetical protein MIMGU_mgv1a005783mg [Erythranthe guttata]	PREDICTED: Solanum tuberosum serine carboxypeptidase-like 42-like (LOC102594919), mRNA	serine carboxypeptidase-like clade II	Serine carboxypeptidase-like 42 OS=Arabidopsis thaliana GN=SCPL42 PE=2 SV=1	Serine carboxypeptidase	proteolysis	serine-type carboxypeptidase activity	--
Tai6.9143	1.04387	0.650883	0.75295	1.0454	0.801306	Molecular Function:catalytic activity (GO:0003824),Molecular Function:coenzyme binding (GO:0050662)	cinnamoyl-CoA reductase	Nucleoside-diphosphate-sugar epimerase	218.689	58.1056	55.209	55.8503	54.0899	cinnamoyl-CoA reductase [Solanum lycopersicum]>gi|65306612|gb|AAY41879.1| cinnamoyl-CoA reductase [Solanum lycopersicum]	Petunia x hybrida cinnamoyl-CoA reductase 1 (CCR1) mRNA, complete cds	cinnamoyl-CoA reductase	Cinnamoyl-CoA reductase 1 OS=Arabidopsis thaliana GN=CCR1 PE=1 SV=1	NAD dependent epimerase/dehydratase family//short chain dehydrogenase//3-beta hydroxysteroid dehydrogenase/isomerase family	coumarin biosynthetic process//lignin biosynthetic process//oxidation-reduction process//steroid biosynthetic process//C21-steroid hormone metabolic process//cellular metabolic process//estrogen metabolic process//androgen metabolic process//stilbene biosynthetic process//metabolic process	oxidoreductase activity//cinnamoyl-CoA reductase activity//oxidoreductase activity, acting on the CH-OH group of donors, NAD or NADP as acceptor//coenzyme binding//catalytic activity//nucleotide binding//3-beta-hydroxy-delta5-steroid dehydrogenase activity	--
Tai6.9134	1.0784	0.585989	0.608821	0.707579	0.806976	--	peroxygenase	Ca2+-binding protein, EF-hand superfamily	0.230468	0.15818	0.155339	0.0348527	0.161689	PREDICTED: probable peroxygenase 5 isoform X1 [Nicotiana sylvestris]	PREDICTED: Solanum tuberosum probable peroxygenase 5-like (LOC102580532), mRNA	peroxygenase	Probable peroxygenase 4 OS=Arabidopsis thaliana GN=PXG4 PE=1 SV=1	EF-hand domain	--	calcium ion binding	--
Tai6.9129	0.945952	0.527465	0.595552	0.936352	1.05052	Biological Process:regulation of lipid kinase activity (GO:0043550),Cellular Component:PAS complex (GO:0070772)	vacuole morphology and inheritance protein 14	--	73.8859	47.696	45.3224	79.6024	60.2715	PREDICTED: protein VAC14 homolog isoform X1 [Nicotiana tomentosiformis]	PREDICTED: Nicotiana sylvestris protein VAC14 homolog (LOC104216426), transcript variant X1, mRNA	vacuole morphology and inheritance protein 14	Protein VAC14 homolog OS=Arabidopsis thaliana GN=VAC14 PE=1 SV=2	HEAT repeat//Armadillo/beta-catenin-like repeat	--	protein binding	Uncharacterized conserved protein
Tai6.9128	0.891522	2.10058	1.22064	0	0	--	dolichyl-phosphate mannosyltransferase polypeptide 3	--	1.92236	1.18889	1.35079	1.01026	1.21307	PREDICTED: dolichol-phosphate mannosyltransferase subunit 3-like [Nicotiana sylvestris]	--	dolichyl-phosphate mannosyltransferase polypeptide 3	--	--	--	--	--
Tai6.9124	1.04813	1.03766	0.533726	0	0	Molecular Function:zinc ion binding (GO:0008270),Molecular Function:TBP-class protein binding (GO:0017025)	transcription initiation factor TFIIB	Transcription initiation factor TFIIIB, Brf1 subunit/Transcription initiation factor TFIIB	146.692	138.107	139.986	213.54	167.105	PREDICTED: transcription initiation factor IIB-2-like [Nicotiana tomentosiformis]	PREDICTED: Glycine max transcription initiation factor IIB-like (LOC100784014), mRNA	transcription initiation factor TFIIB	Transcription initiation factor IIB OS=Glycine max GN=TFIIB1 PE=2 SV=1	Transcription factor TFIIB repeat	--	TBP-class protein binding	Transcription initiation factor TFIIB
Tai6.9105	0.991472	1.18502	1.26153	2.28241	1.11181	--	cohesin complex subunit SA-1/2	--	29.2898	24.9595	27.7729	32.1149	34.3468	PREDICTED: sister-chromatid cohesion protein 3 isoform X2 [Nicotiana sylvestris]	PREDICTED: Nicotiana sylvestris sister-chromatid cohesion protein 3 (LOC104214069), transcript variant X2, mRNA	cohesin complex subunit SA-1/2	Sister-chromatid cohesion protein 3 OS=Arabidopsis thaliana GN=SCC3 PE=1 SV=2	HEAT repeat//ATP synthase (E/31 kDa) subunit//Paired amphipathic helix repeat	regulation of transcription, DNA-templated//oxidative phosphorylation//ATP hydrolysis coupled proton transport//proton transport	protein binding//proton-transporting ATPase activity, rotational mechanism	Sister chromatid cohesion complex Cohesin, subunit STAG/IRR1/SCC3
Tai6.9104	0.333333	0	0.256268	0.750594	0.771444	--	nuclear protein localization protein 4 homolog	--	0.0448537	0.0722259	0.0773258	0.0136975	0.0789042	PREDICTED: NPL4-like protein 1 [Nicotiana sylvestris]	PREDICTED: Prunus mume NPL4-like protein 2 (LOC103333843), mRNA	nuclear protein localization protein 4 homolog	NPL4-like protein 2 OS=Arabidopsis thaliana GN=At2g47970 PE=1 SV=1	Ubiquitin-like domain//Ubiquitin family	--	protein binding	Nuclear pore complex, rNpl4 component (sc Npl4)
Tai6.9094	0.333333	0	0.431574	1.6999	1.44526	Molecular Function:ATP binding (GO:0005524),Biological Process:DNA replication (GO:0006260),Biological Process:oxidation-reduction process (GO:0055114)	ribonucleoside-diphosphate reductase subunit M1	Ribonucleotide reductase alpha subunit	12.4476	10.16	18.1735	20.1645	24.3014	PREDICTED: ribonucleoside-diphosphate reductase large subunit [Nicotiana tomentosiformis]	PREDICTED: Nicotiana tomentosiformis ribonucleoside-diphosphate reductase large subunit (LOC104091603), mRNA	ribonucleoside-diphosphate reductase subunit M1	Ribonucleoside-diphosphate reductase large subunit OS=Arabidopsis thaliana GN=RNR1 PE=1 SV=1	Ribonucleotide reductase, barrel domain//Ribonucleotide reductase, all-alpha domain	pyrimidine nucleobase metabolic process//deoxyribonucleoside diphosphate metabolic process//oxidation-reduction process//DNA replication//purine nucleobase metabolic process	ribonucleoside-diphosphate reductase activity, thioredoxin disulfide as acceptor//ATP binding	Ribonucleotide reductase, alpha subunit
Tai6.9087	0.825122	1.94274	1.29624	1.46449	1.17516	Biological Process:oxidation-reduction process (GO:0055114)	cinnamyl-alcohol dehydrogenase	D-arabinose 1-dehydrogenase, Zn-dependent alcohol dehydrogenase family	0.179429	0.247166	0.182877	0.0552452	0	PREDICTED: probable cinnamyl alcohol dehydrogenase 9 [Solanum lycopersicum]	--	cinnamyl-alcohol dehydrogenase	Probable mannitol dehydrogenase OS=Medicago sativa GN=CAD1 PE=1 SV=1	Alcohol dehydrogenase GroES-like domain	oxidation-reduction process	--	--
Tai6.9086	0.81476	0.767036	0.877387	1.32265	1.14098	Biological Process:oxidation-reduction process (GO:0055114)	cinnamyl-alcohol dehydrogenase	D-arabinose 1-dehydrogenase, Zn-dependent alcohol dehydrogenase family	7.1069	8.19368	3.10473	5.18492	4.55793	PREDICTED: probable cinnamyl alcohol dehydrogenase 9 [Solanum lycopersicum]	Populus trichocarpa hypothetical protein (POPTR_0001s27550g) mRNA, complete cds	cinnamyl-alcohol dehydrogenase	Probable cinnamyl alcohol dehydrogenase 9 OS=Arabidopsis thaliana GN=CAD9 PE=2 SV=2	Zinc-binding dehydrogenase	oxidation-reduction process	--	--
Tai6.9085	0.93841	1.52434	0.866417	0	0	--	--	--	0.562704	1.40736	3.20526	3.64129	4.52284	PREDICTED: neurofilament medium polypeptide-like [Nicotiana tomentosiformis]	--	--	--	--	--	--	--
Tai6.9082	0.975104	1.03873	1.21585	1.19202	1.33666	--	actin, other eukaryote	Actin-related protein	33.8742	44.4293	53.4229	48.1618	48.5424	unnamed protein product [Coffea canephora]	Glycyrrhiza uralensis actin 2 mRNA, complete cds	actin, other eukaryote	Actin-11 OS=Arabidopsis thaliana GN=ACT11 PE=1 SV=1	Anemonia sulcata toxin III family//Ammonium Transporter Family	ammonium transport//pathogenesis//transport	sodium channel inhibitor activity//ammonium transmembrane transporter activity	Actin and related proteins
Tai6.9046	0.333333	0	0.228104	0.561862	0.577381	Molecular Function:sequence-specific DNA binding (GO:0043565)	cyclic AMP-dependent transcription factor ATF-4	--	59.6818	66.7731	79.4128	57.0957	53.7159	PREDICTED: transcription factor RF2a-like isoform X1 [Nicotiana tomentosiformis]>gi|697112563|ref|XP_009610159.1| PREDICTED: transcription factor RF2a-like isoform X1 [Nicotiana tomentosiformis]>gi|697112565|ref|XP_009610160.1| PREDICTED: transcription factor RF2a-like isoform X1 [Nicotiana tomentosiformis]	PREDICTED: Sesamum indicum transcription factor RF2b-like (LOC105159326), mRNA	--	Transcription factor RF2b OS=Oryza sativa subsp. japonica GN=RF2b PE=1 SV=2	bZIP transcription factor//bZIP Maf transcription factor//Phage capsid scaffolding protein (GPO) serine peptidase//TolA binding protein trimerisation//Basic region leucine zipper	protein trimerization//regulation of transcription, DNA-templated//viral capsid assembly	sequence-specific DNA binding//transcription factor activity, sequence-specific DNA binding//DNA binding	--
Tai6.9027	0.333333	0	0.281308	1.53177	1.53637	--	high mobility group protein B3	--	260.628	223.867	246.188	178.515	190.55	PREDICTED: HMG1/2-like protein [Sesamum indicum]	Prunus persica hypothetical protein (PRUPE_ppa011596mg) mRNA, complete cds	high mobility group protein B1	HMG1/2-like protein OS=Ipomoea nil PE=2 SV=1	ZIP Zinc transporter	transmembrane transport//metal ion transport	metal ion transmembrane transporter activity	--
Tai6.9023	0.980234	0.827793	0.5882	0	0	Molecular Function:ADP binding (GO:0043531)	structure-specific endonuclease subunit SLX1	Predicted ATPase	0.568039	1.49844	0.802487	1.30521	0.785333	PREDICTED: putative disease resistance protein RGA3 [Nicotiana tomentosiformis]	Ipomoea batata isolate SP-03_G12 resistance gene analog genomic sequence	--	Putative disease resistance protein RGA3 OS=Solanum bulbocastanum GN=RGA3 PE=2 SV=2	ABC transporter//ATPase family associated with various cellular activities (AAA)//NB-ARC domain//Archaeal ATPase	--	ATP binding//ATPase activity//ADP binding	--
Tai6.9006	0.902357	0.28064	0.265574	0.221132	0.246166	Molecular Function:catalytic activity (GO:0003824),Molecular Function:coenzyme binding (GO:0050662)	cinnamoyl-CoA reductase	Nucleoside-diphosphate-sugar epimerase	303.87	28.7816	22.2303	15.018	15.1707	unnamed protein product [Coffea canephora]	PREDICTED: Solanum tuberosum cinnamoyl-CoA reductase 1-like (LOC102584718), mRNA	--	Tetraketide alpha-pyrone reductase 1 OS=Arabidopsis thaliana GN=TKPR1 PE=1 SV=1	Rho termination factor, RNA-binding domain//3-beta hydroxysteroid dehydrogenase/isomerase family//Glycosyltransferase family 6//short chain dehydrogenase//NAD dependent epimerase/dehydratase family	DNA-templated transcription, termination//carbohydrate metabolic process//steroid biosynthetic process//oxidation-reduction process//estrogen metabolic process//C21-steroid hormone metabolic process//metabolic process//androgen metabolic process	transferase activity, transferring hexosyl groups//oxidoreductase activity//oxidoreductase activity, acting on the CH-OH group of donors, NAD or NADP as acceptor//catalytic activity//coenzyme binding//RNA binding//3-beta-hydroxy-delta5-steroid dehydrogenase activity	--
Tai6.9003	0.88408	0.310321	0.309465	0.295807	0.276009	--	cinnamoyl-CoA reductase	--	87.8608	6.33899	5.20735	2.38302	3.92093	unnamed protein product [Coffea canephora]	PREDICTED: Nicotiana sylvestris cinnamoyl-CoA reductase 1-like (LOC104247795), partial mRNA	--	Cinnamoyl-CoA reductase 1 OS=Arabidopsis thaliana GN=CCR1 PE=1 SV=1	--	--	--	--
Tai6.9	0.333333	0	0.427331	1.20838	1.05134	--	heat shock 70kDa protein 1/8	Molecular chaperone DnaK (HSP70)	2.80224	7.77531	7.58879	4.72162	7.38389	PREDICTED: heat shock 70 kDa protein 6, chloroplastic-like [Solanum tuberosum]	PREDICTED: Nicotiana tomentosiformis stromal 70 kDa heat shock-related protein, chloroplastic-like (LOC104086326), mRNA	--	Stromal 70 kDa heat shock-related protein, chloroplastic OS=Pisum sativum GN=HSP70 PE=2 SV=1	FGGY family of carbohydrate kinases, C-terminal domain//Hydantoinase/oxoprolinase//MreB/Mbl protein	carbohydrate metabolic process//cell morphogenesis	phosphotransferase activity, alcohol group as acceptor//hydrolase activity	Molecular chaperones mortalin/PBP74/GRP75, HSP70 superfamily
Tai6.8969	0.961756	1.59585	1.63488	1.66715	1.46579	Molecular Function:calcium ion binding (GO:0005509)	mediator of RNA polymerase II transcription subunit 10	Serine protease, subtilisin family	146.488	151.853	179.771	197.392	173.599	PREDICTED: vacuolar-sorting receptor 1-like isoform X2 [Nicotiana tomentosiformis]	PREDICTED: Nicotiana sylvestris vacuolar-sorting receptor 1-like (LOC104225321), mRNA	--	Vacuolar-sorting receptor 1 OS=Arabidopsis thaliana GN=VSR1 PE=1 SV=2	Calcium-binding EGF domain	--	calcium ion binding	--
Tai6.8958	1.20403	1.40596	1.07315	1.47015	1.18823	Molecular Function:GDP-dissociation inhibitor activity (GO:0005092),Molecular Function:Rab GDP-dissociation inhibitor activity (GO:0005093),Biological Process:small GTPase mediated signal transduction (GO:0007264),Biological Process:protein transport (GO:0015031)	Rab GDP dissociation inhibitor	--	184.506	128.483	125.73	108.498	109.789	PREDICTED: rab GDP dissociation inhibitor alpha-like [Solanum tuberosum]	PREDICTED: Nicotiana tomentosiformis guanosine nucleotide diphosphate dissociation inhibitor 2-like (LOC104112637), mRNA	Rab GDP dissociation inhibitor	Guanosine nucleotide diphosphate dissociation inhibitor 1 OS=Arabidopsis thaliana GN=GDI1 PE=1 SV=1	heparan sulfate-N-deacetylase//Flavin containing amine oxidoreductase	oxidation-reduction process	hydrolase activity//oxidoreductase activity//[heparan sulfate]-glucosamine N-sulfotransferase activity	RAB proteins geranylgeranyltransferase component A (RAB escort protein)
Tai6.8951	0.854438	1.32544	0.975937	0	0	--	--	--	0.95191	1.28524	2.00444	1.94841	1.89986	PREDICTED: uncharacterized membrane protein At1g16860-like [Nicotiana tomentosiformis]	PREDICTED: Citrus sinensis uncharacterized LOC102608853 (LOC102608853), mRNA	--	Uncharacterized membrane protein At1g16860 OS=Arabidopsis thaliana GN=At1g16860 PE=1 SV=1	MOZ/SAS family	regulation of transcription, DNA-templated	transferase activity, transferring acyl groups other than amino-acyl groups	--
Tai6.895	1.15353	1.34688	0.783251	0	0	--	--	--	34.1295	32.871	32.1211	31.3473	31.2394	PREDICTED: uncharacterized protein LOC104102883 [Nicotiana tomentosiformis]>gi|697110308|ref|XP_009609023.1| PREDICTED: uncharacterized protein LOC104102883 [Nicotiana tomentosiformis]	--	--	--	--	--	--	--
Tai6.8938	1.02201	1.12879	1.03594	0.655882	0.716328	--	calcium binding protein 39	--	50.736	38.4242	37.7776	45.3427	44.3174	hypothetical protein CICLE_v10015837mg [Citrus clementina]>gi|557552490|gb|ESR63119.1| hypothetical protein CICLE_v10015837mg [Citrus clementina]>gi|641859775|gb|KDO78465.1| hypothetical protein CISIN_1g017213mg [Citrus sinensis]	PREDICTED: Nicotiana sylvestris putative MO25-like protein At5g47540 (LOC104244355), mRNA	calcium binding protein 39	Putative MO25-like protein At5g47540 OS=Arabidopsis thaliana GN=At5g47540 PE=2 SV=1	Armadillo/beta-catenin-like repeat//CTP synthase N-terminus	pyrimidine nucleobase metabolic process//pyrimidine nucleotide biosynthetic process	CTP synthase activity//protein binding	Conserved protein Mo25
Tai6.8914	1.06448	0.678161	0.500421	0	0	Molecular Function:structural constituent of ribosome (GO:0003735),Cellular Component:intracellular (GO:0005622),Cellular Component:ribosome (GO:0005840),Biological Process:translation (GO:0006412)	large subunit ribosomal protein L22e	--	111.035	125.185	192.515	173.049	150.284	60S ribosomal L22-2 -like protein [Gossypium arboreum]>gi|728841109|gb|KHG20552.1| 60S ribosomal L22-2 -like protein [Gossypium arboreum]	PREDICTED: Sesamum indicum 60S ribosomal protein L22-2-like (LOC105168926), mRNA	large subunit ribosomal protein L22e	60S ribosomal protein L22-2 OS=Arabidopsis thaliana GN=RPL22B PE=2 SV=1	Ribosomal L22e protein family	ribosome biogenesis//translation	structural constituent of ribosome	60S ribosomal protein L22
Tai6.8911	0.981183	1.05376	1.09412	1.25796	1.07653	Molecular Function:ATP binding (GO:0005524)	26S proteasome regulatory subunit T5	ATP-dependent 26S proteasome regulatory subunit	92.0945	100.017	108.115	87.5701	93.311	hypothetical protein EUGRSUZ_L00637 [Eucalyptus grandis]	PREDICTED: Nicotiana sylvestris 26S protease regulatory subunit 6A homolog (LOC104231214), mRNA	26S proteasome regulatory subunit T5	26S protease regulatory subunit 6A homolog OS=Solanum lycopersicum GN=TBP1 PE=2 SV=1	Holliday junction DNA helicase ruvB N-terminus//ATPase family associated with various cellular activities (AAA)//TIP49 C-terminus//Sigma-54 interaction domain//Threonylcarbamoyl adenosine biosynthesis protein TsaE//IstB-like ATP binding protein//ATPase family associated with various cellular activities (AAA)//PhoH-like protein//RNA helicase//AAA domain (dynein-related subfamily)	regulation of transcription, DNA-templated//DNA repair//tRNA threonylcarbamoyladenosine modification//DNA recombination	RNA helicase activity//DNA helicase activity//ATP binding//RNA binding//four-way junction helicase activity//transcription factor binding//ATPase activity	26S proteasome regulatory complex, ATPase RPT5
Tai6.8906	0.744031	5.0936	2.0741	1.29657	1.33253	Molecular Function:GTPase activity (GO:0003924),Molecular Function:structural constituent of cytoskeleton (GO:0005200),Molecular Function:GTP binding (GO:0005525),Cellular Component:microtubule (GO:0005874),Biological Process:microtubule-based process (GO:0007017)	tubulin beta	--	31.6932	71.1654	22.3981	29.0601	44.3767	uncharacterized protein LOC100381281 [Zea mays]>gi|670385149|ref|XP_008673428.1| PREDICTED: tubulin beta-6 chain isoform X2 [Zea mays]>gi|194702760|gb|ACF85464.1| unknown [Zea mays]>gi|414880072|tpg|DAA57203.1| TPA: beta tubulin6 isoform 1 [Zea mays]>gi|414880073|tpg|DAA57204.1| TPA: beta tubulin6 isoform 2 [Zea mays]	PREDICTED: Pyrus x bretschneideri tubulin beta chain-like (LOC103929828), mRNA	tubulin beta	Tubulin beta chain OS=Hordeum vulgare GN=TUBB PE=2 SV=1	Tubulin/FtsZ family, GTPase domain	microtubule-based movement//obsolete GTP catabolic process//protein polymerization	GTPase activity//structural molecule activity//GTP binding	--
Tai6.8905	1.00874	1.35824	1.53663	1.26904	1.3731	Biological Process:carbohydrate metabolic process (GO:0005975),Molecular Function:glycogen phosphorylase activity (GO:0008184)	starch phosphorylase	Glucan phosphorylase	42.1498	142.993	217.785	298.44	308.762	unnamed protein product [Coffea canephora]	AF331659 Ipomoea batatas starch phosphorylase mRNA, partial cds	starch phosphorylase	Alpha-glucan phosphorylase, H isozyme OS=Solanum tuberosum PE=1 SV=1	Carbohydrate phosphorylase	carbohydrate metabolic process	glycogen phosphorylase activity	Glycogen phosphorylase
Tai6.8901	1.05096	1.37962	1.34061	1.23742	1.22513	Biological Process:intracellular protein transport (GO:0006886),Molecular Function:P-P-bond-hydrolysis-driven protein transmembrane transporter activity (GO:0015450),Cellular Component:outer membrane (GO:0019867)	outer membrane protein insertion porin family	Outer membrane protein assembly factor BamA	0.0192734	0	0	0	0.0400622	PREDICTED: protein TOC75-3, chloroplastic [Solanum lycopersicum]	PREDICTED: Solanum lycopersicum protein TOC75-3, chloroplastic (LOC101244592), mRNA	--	Protein TOC75-3, chloroplastic OS=Arabidopsis thaliana GN=TOC75-3 PE=1 SV=1	Surface antigen variable number repeat//Surface antigen	--	--	--
Tai6.8900	0.729564	0.702888	0.881043	1.2254	1.13616	--	--	--	0.0179191	0.0196758	0.0727103	0.0216225	0.039568	unnamed protein product [Coffea canephora]	PREDICTED: Gossypium raimondii protein TIC 62, chloroplastic (LOC105791575), mRNA	--	--	--	--	--	--
Tai6.8881	1.0685	0.419284	0.257199	0	0	--	proteinaceous RNase P	--	4.0153	4.16802	4.74247	5.82178	5.45872	PREDICTED: proteinaceous RNase P 2 [Nicotiana sylvestris]>gi|698486097|ref|XP_009789797.1| PREDICTED: proteinaceous RNase P 2 [Nicotiana sylvestris]	Prunus persica hypothetical protein (PRUPE_ppa003743mg) mRNA, complete cds	proteinaceous RNase P	Proteinaceous RNase P 2 OS=Arabidopsis thaliana GN=PRORP2 PE=1 SV=1	BRK domain	--	hydrolase activity, acting on acid anhydrides//protein binding	--
Tai6.8879	0.777059	0.607451	0.184314	0	0	Molecular Function:DNA binding (GO:0003677),Molecular Function:DNA topoisomerase type II (ATP-hydrolyzing) activity (GO:0003918),Molecular Function:ATP binding (GO:0005524),Biological Process:DNA topological change (GO:0006265)	DNA topoisomerase II	--	5.69685	10.2777	2.55159	4.5576	6.69165	PREDICTED: DNA topoisomerase 2-like [Solanum tuberosum]	--	DNA topoisomerase II	DNA topoisomerase 2 OS=Pisum sativum GN=TOP2 PE=2 SV=1	--	--	--	--
Tai6.8844	0.842414	0.705038	0.796134	0	0	Cellular Component:cytoskeleton (GO:0005856),Biological Process:actin cytoskeleton organization (GO:0030036)	phosphoenolpyruvate carboxylase	--	21.2006	25.4657	22.3553	34.3024	34.4659	PREDICTED: protein SCAR1 isoform X1 [Nicotiana tomentosiformis]>gi|697102608|ref|XP_009602011.1| PREDICTED: protein SCAR1 isoform X1 [Nicotiana tomentosiformis]	Theobroma cacao SCAR family protein, putative isoform 2 (TCM_029698) mRNA, complete cds	--	Protein SCAR1 OS=Arabidopsis thaliana GN=SCAR1 PE=1 SV=1	Oligogalacturonate lyase//Mlo family	pectin catabolic process//defense response	oligogalacturonide lyase activity	--
Tai6.8843	0.925431	0.956031	0.495247	0	0	--	--	--	83.233	452.325	544.596	574.827	658.229	PREDICTED: uncharacterized protein LOC102591189 [Solanum tuberosum]	PREDICTED: Erythranthe guttatus protein LIGHT-DEPENDENT SHORT HYPOCOTYLS 10-like (LOC105968872), mRNA	--	Protein LIGHT-DEPENDENT SHORT HYPOCOTYLS 10 OS=Arabidopsis thaliana GN=LSH10 PE=1 SV=1	--	--	--	--
Tai6.883	0.986971	0.62586	0.353491	0	0	Biological Process:protein glycosylation (GO:0006486),Molecular Function:galactosyltransferase activity (GO:0008378),Cellular Component:membrane (GO:0016020),Molecular Function:carbohydrate binding (GO:0030246)	beta-1,3-galactosyltransferase	--	19.9914	25.9434	19.6271	26.7298	24.3268	PREDICTED: probable beta-1,3-galactosyltransferase 19 [Nicotiana tomentosiformis]	PREDICTED: Solanum lycopersicum probable beta-1,3-galactosyltransferase 19 (LOC101249547), mRNA	--	Probable beta-1,3-galactosyltransferase 19 OS=Arabidopsis thaliana GN=B3GALT19 PE=2 SV=2	Galactosyltransferase//Galactoside-binding lectin//Fringe-like	protein glycosylation	carbohydrate binding//galactosyltransferase activity//transferase activity, transferring glycosyl groups	--
Tai6.8807	0.333333	0	0.384712	1.55013	1.07352	Molecular Function:nucleic acid binding (GO:0003676),Molecular Function:zinc ion binding (GO:0008270)	--	--	79.1981	94.4258	75.1931	89.4867	87.4487	PREDICTED: CAX-interacting protein 4 [Nicotiana tomentosiformis]>gi|697147970|ref|XP_009628158.1| PREDICTED: CAX-interacting protein 4 [Nicotiana tomentosiformis]	PREDICTED: Jatropha curcas CAX-interacting protein 4 (LOC105637157), mRNA	--	CAX-interacting protein 4 OS=Arabidopsis thaliana GN=CXIP4 PE=1 SV=2	FHIPEP family//Zinc knuckle//Ryanodine Receptor TM 4-6	protein secretion//calcium ion transport//cellular calcium ion homeostasis	ryanodine-sensitive calcium-release channel activity//zinc ion binding//nucleic acid binding	--
Tai6.8788	0.843429	0.400571	0.27981	0	0	Molecular Function:protein disulfide isomerase activity (GO:0003756),Cellular Component:endoplasmic reticulum (GO:0005783),Biological Process:oxidation-reduction process (GO:0055114)	ERO1-like protein alpha	--	1.58303	7.29094	14.8951	5.03475	40.2261	Endoplasmic oxidoreductin-1 precursor, putative [Ricinus communis]>gi|223525406|gb|EEF28005.1| Endoplasmic oxidoreductin-1 precursor, putative [Ricinus communis]	PREDICTED: Cicer arietinum endoplasmic reticulum oxidoreductin-1-like (LOC101500489), mRNA	ERO1-like protein alpha	Endoplasmic reticulum oxidoreductin-2 OS=Arabidopsis thaliana GN=AERO2 PE=1 SV=1	Endoplasmic Reticulum Oxidoreductin 1 (ERO1)//Mitochondrial morphogenesis regulator	mitochondrion organization//oxidation-reduction process	protein disulfide isomerase activity//oxidoreductase activity, acting on a sulfur group of donors, disulfide as acceptor	Endoplasmic reticulum membrane-associated oxidoreductin involved in disulfide bond formation
Tai6.878	0.333333	0	0.300287	0.623324	0.659004	--	--	--	6.34162	3.52873	4.25613	3.0873	3.34115	PREDICTED: protein FMP32, mitochondrial isoform X2 [Nelumbo nucifera]	PREDICTED: Solanum tuberosum protein FMP32, mitochondrial-like (LOC102604343), mRNA	--	Protein FMP32, mitochondrial OS=Saccharomyces cerevisiae (strain ATCC 204508 / S288c) GN=FMP32 PE=1 SV=1	CHD5-like protein//fzo-like conserved region//TolA binding protein trimerisation	mitochondrial fusion//tail-anchored membrane protein insertion into ER membrane//protein trimerization	GTPase activity	Uncharacterized membrane protein
Tai6.8773	0.333333	0	0.202964	0.640034	0.542311	Molecular Function:nucleic acid binding (GO:0003676)	RNA-binding protein Musashi	RNA recognition motif (RRM) domain	14.3899	14.0329	11.6231	8.33216	6.72216	PREDICTED: heterogeneous nuclear ribonucleoprotein 1-like [Sesamum indicum]	PREDICTED: Solanum tuberosum RNA-binding protein 1-like (LOC102582431), mRNA	RNA-binding protein Musashi	RNA-binding protein 1 OS=Arabidopsis thaliana GN=RBP1 PE=2 SV=1	RNA recognition motif. (a.k.a. RRM, RBD, or RNP domain)//RNA binding motif//RNA recognition motif	--	nucleic acid binding//RNA binding	RNA-binding protein musashi/mRNA cleavage and polyadenylation factor I complex, subunit HRP1
Tai6.8765	1.0355	1.46417	2.75937	0	0	--	riboflavin kinase	Beta-phosphoglucomutase or related phosphatase, HAD superfamily	9.9929	14.4447	13.357	11.5163	10.9141	PREDICTED: haloacid dehalogenase-like hydrolase domain-containing protein Sgpp-like [Solanum tuberosum]	PREDICTED: Solanum tuberosum haloacid dehalogenase-like hydrolase domain-containing protein Sgpp-like (LOC102599074), mRNA	--	Haloacid dehalogenase-like hydrolase domain-containing protein Sgpp OS=Arabidopsis thaliana GN=SGPP PE=1 SV=2	--	--	--	Predicted haloacid-halidohydrolase and related hydrolases
Tai6.8760	1.02492	0.891262	1.0149	1.12745	0.997899	Molecular Function:malic enzyme activity (GO:0004470),Molecular Function:malate dehydrogenase (decarboxylating) (NAD+) activity (GO:0004471),Biological Process:malate metabolic process (GO:0006108),Molecular Function:NAD binding (GO:0051287),Biological Process:oxidation-reduction process (GO:0055114)	malate dehydrogenase (decarboxylating)	Malic enzyme	153.439	101.509	124.588	135.676	128.692	PREDICTED: NAD-dependent malic enzyme 62 kDa isoform, mitochondrial [Solanum lycopersicum]>gi|723720500|ref|XP_010324690.1| PREDICTED: NAD-dependent malic enzyme 62 kDa isoform, mitochondrial [Solanum lycopersicum]	PREDICTED: Solanum lycopersicum NAD-dependent malic enzyme 62 kDa isoform, mitochondrial (LOC101246159), transcript variant X2, mRNA	malate dehydrogenase (decarboxylating)	NAD-dependent malic enzyme 62 kDa isoform, mitochondrial OS=Solanum tuberosum PE=1 SV=1	Malic enzyme, NAD binding domain//Malic enzyme, N-terminal domain	carbon utilization//tricarboxylic acid cycle//oxidation-reduction process//pyruvate metabolic process//malate metabolic process	malate dehydrogenase (decarboxylating) (NAD+) activity//NAD binding	NADP+-dependent malic enzyme
Tai6.8752	0.898237	1.43109	1.24982	0.973492	0.969516	--	--	--	0	0.0878649	0	0	0.0410604	PREDICTED: protein TRIGALACTOSYLDIACYLGLYCEROL 4, chloroplastic [Prunus mume]	PREDICTED: Nicotiana tomentosiformis protein TRIGALACTOSYLDIACYLGLYCEROL 4, chloroplastic (LOC104106565), mRNA	--	Protein TRIGALACTOSYLDIACYLGLYCEROL 4, chloroplastic OS=Arabidopsis thaliana GN=TGD4 PE=1 SV=1	--	--	--	--
Tai6.8752	0.898237	1.43109	1.24982	0.973492	0.969516	--	--	--	0	0.0878649	0	0	0.0410604	PREDICTED: protein TRIGALACTOSYLDIACYLGLYCEROL 4, chloroplastic [Prunus mume]	PREDICTED: Nicotiana tomentosiformis protein TRIGALACTOSYLDIACYLGLYCEROL 4, chloroplastic (LOC104106565), mRNA	--	Protein TRIGALACTOSYLDIACYLGLYCEROL 4, chloroplastic OS=Arabidopsis thaliana GN=TGD4 PE=1 SV=1	--	--	--	--
Tai6.8727	0.890508	1.3494	1.01986	0.982983	1.08242	Molecular Function:structural constituent of ribosome (GO:0003735),Cellular Component:ribosome (GO:0005840),Biological Process:translation (GO:0006412),Cellular Component:large ribosomal subunit (GO:0015934)	large subunit ribosomal protein L17e	Ribosomal protein L22	74.2228	69.3642	116.691	96.7739	84.2295	PREDICTED: 60S ribosomal protein L17-2 [Sesamum indicum]	Vitis vinifera clone SS0AEB23YO06	large subunit ribosomal protein L17e	60S ribosomal protein L17-2 OS=Arabidopsis thaliana GN=RPL17B PE=2 SV=2	Ribosomal protein L22p/L17e	ribosome biogenesis//translation	structural constituent of ribosome	60S ribosomal protein L22
Tai6.8726	1.05859	1.22079	0.909817	0.966241	0.991478	Molecular Function:nucleic acid binding (GO:0003676)	polyadenylate-binding protein	RNA recognition motif (RRM) domain	63.0723	81.7697	56.7767	85.4915	59.5721	PREDICTED: heterogeneous nuclear ribonucleoprotein R-like isoform X1 [Nicotiana sylvestris]>gi|698528504|ref|XP_009761084.1| PREDICTED: heterogeneous nuclear ribonucleoprotein R-like isoform X1 [Nicotiana sylvestris]>gi|698528506|ref|XP_009761085.1| PREDICTED: heterogeneous nuclear ribonucleoprotein R-like isoform X1 [Nicotiana sylvestris]	PREDICTED: Solanum tuberosum heterogeneous nuclear ribonucleoprotein R-like (LOC102593822), transcript variant X2, mRNA	--	Heterogeneous nuclear ribonucleoprotein Q OS=Homo sapiens GN=SYNCRIP PE=1 SV=2	RNA recognition motif. (a.k.a. RRM, RBD, or RNP domain)//RNA recognition motif	--	nucleic acid binding	Heterogeneous nuclear ribonucleoprotein R (RRM superfamily)
Tai6.87	1.13272	1.00102	1.01541	1.42715	1.27886	Molecular Function:ATP binding (GO:0005524)	26S proteasome regulatory subunit T6	ATP-dependent 26S proteasome regulatory subunit	63.1108	62.1604	59.7514	60.2495	58.1184	PREDICTED: 26S protease regulatory subunit 8 homolog A-like [Nicotiana sylvestris]>gi|442539518|gb|AGC54442.1| 26S proteasome ATPase regulatory subunit 6 [Nicotiana tabacum]	PREDICTED: Nicotiana sylvestris 26S protease regulatory subunit 8 homolog A-like (LOC104221125), mRNA	26S proteasome regulatory subunit T6	26S protease regulatory subunit 8 homolog A OS=Arabidopsis thaliana GN=RPT6A PE=1 SV=1	Parvovirus non-structural protein NS1//ATPase family associated with various cellular activities (AAA)//NB-ARC domain//RNA helicase//ABC transporter//TIP49 C-terminus//Threonylcarbamoyl adenosine biosynthesis protein TsaE//GAT domain//Type III restriction enzyme, res subunit//PhoH-like protein//AAA domain (dynein-related subfamily)//AAA domain (Cdc48 subfamily)//Holliday junction DNA helicase ruv…	tRNA threonylcarbamoyladenosine modification//intracellular protein transport//DNA recombination//DNA repair//regulation of transcription, DNA-templated//viral genome replication	hydrolase activity//RNA binding//four-way junction helicase activity//RNA helicase activity//ADP binding//DNA helicase activity//ATP binding//DNA binding//ATPase activity//transcription factor binding	26S proteasome regulatory complex, ATPase RPT6
Tai6.8688	0.964391	0.291667	0.558473	1.57866	1.38988	--	--	L-ascorbate metabolism protein UlaG, beta-lactamase superfamily	0.310467	0.280909	0.137807	0.244661	0.186276	--	--	--	--	--	--	--	--
Tai6.8676	0.653766	0.186823	0.202474	0.219178	0.216839	--	--	--	1.5787	1.9124	2.78868	1.52261	2.86709	PREDICTED: uncharacterized protein LOC105179255 [Sesamum indicum]	PREDICTED: Populus euphratica uncharacterized LOC105129613 (LOC105129613), mRNA	--	Uncharacterized protein ycf20 OS=Pyropia yezoensis GN=ycf20 PE=3 SV=1	Domain found in IF2B/IF5	regulation of translational initiation//translational initiation	translation initiation factor activity	--
Tai6.866	0.957118	0.810749	0.518868	0	0	Biological Process:transmembrane transport (GO:0055085)	solute carrier family 35 (UDP-galactose transporter), member B1	--	0.205394	0	0	0.0846527	0.0769102	PREDICTED: UDP-galactose/UDP-glucose transporter 3 [Nicotiana tomentosiformis]	PREDICTED: Solanum tuberosum UDP-galactose/UDP-glucose transporter 3-like (LOC102606171), mRNA	solute carrier family 35 (UDP-galactose transporter), member B1	UDP-galactose/UDP-glucose transporter 3 OS=Arabidopsis thaliana GN=UTR3 PE=1 SV=1	EamA-like transporter family//UAA transporter family	transmembrane transport	--	UDP-galactose transporter related protein
Tai6.8659	1.19868	0.803847	0.919933	0.928644	1.05641	--	--	--	28.3224	22.2507	32.6146	34.1909	39.2597	PREDICTED: uncharacterized protein LOC104226362 [Nicotiana sylvestris]	PREDICTED: Nicotiana tomentosiformis coiled-coil domain-containing protein 18 (LOC104116382), mRNA	--	--	Protein of unknown function (DUF1211)//RNA polymerase II transcription mediator complex subunit 9	regulation of transcription from RNA polymerase II promoter//potassium ion transport	RNA polymerase II transcription cofactor activity//potassium channel activity	--
Tai6.865	0.333333	0	0.220464	0.558861	0.575105	--	mediator of RNA polymerase II transcription subunit 28	--	33.0489	31.7601	41.186	39.1177	37.7723	PREDICTED: mediator of RNA polymerase II transcription subunit 28-like [Solanum lycopersicum]	PREDICTED: Nelumbo nucifera mediator of RNA polymerase II transcription subunit 28 (LOC104598921), mRNA	--	Mediator of RNA polymerase II transcription subunit 28 OS=Arabidopsis thaliana GN=MED28 PE=1 SV=1	--	--	--	--
Tai6.8648	0.333333	2.24853	0.958339	0.705085	0.556074	Biological Process:nucleoside metabolic process (GO:0009116)	adenine phosphoribosyltransferase	Adenine/guanine phosphoribosyltransferase or related PRPP-binding protein	1.63626	41.1191	28.0928	28.2485	43.1745	Adenine phosphoribosyltransferase, putative [Ricinus communis]>gi|223545439|gb|EEF46944.1| Adenine phosphoribosyltransferase, putative [Ricinus communis]	--	adenine phosphoribosyltransferase	Adenine phosphoribosyltransferase 5 OS=Arabidopsis thaliana GN=APT5 PE=1 SV=1	Phosphoribosyl transferase domain	adenine salvage//purine nucleobase metabolic process//nucleoside metabolic process	adenine phosphoribosyltransferase activity	Adenine phosphoribosyl transferases
Tai6.8635	1.04311	0.760417	0.893973	1.10829	1.12228	--	--	--	16.9828	12.359	14.6898	16.3119	15.5688	unnamed protein product [Coffea canephora]	Prunus persica hypothetical protein (PRUPE_ppa002406mg) mRNA, complete cds	--	Acyl-CoA-binding domain-containing protein 4 OS=Arabidopsis thaliana GN=ACBP4 PE=1 SV=1	Growth-arrest specific micro-tubule binding//cGMP-dependent protein kinase interacting domain//Fanconi anemia-associated//Bcr-Abl oncoprotein oligomerisation domain	signal transduction//protein phosphorylation//cell motility//DNA repair//serine family amino acid metabolic process//phosphorylation	protein serine/threonine kinase activity//GTPase activator activity//protein kinase binding	--
Tai6.8615	0.333333	0	0.296436	1.22851	1.49644	Cellular Component:cell wall (GO:0005618),Molecular Function:pectinesterase activity (GO:0030599),Biological Process:cell wall modification (GO:0042545)	pectinesterase	Pectin methylesterase and related acyl-CoA thioesterases	0.173302	0.0761019	0.153282	0.183724	0.173149	hypothetical protein EUGRSUZ_G02070 [Eucalyptus grandis]	PREDICTED: Nelumbo nucifera pectinesterase 31 (LOC104598168), transcript variant X2, mRNA	pectinesterase	Pectinesterase 31 OS=Arabidopsis thaliana GN=PME31 PE=1 SV=1	Pectinesterase	cell wall modification//sucrose metabolic process//starch metabolic process	pectinesterase activity	--
Tai6.8614	0.724261	0.59284	0.68394	0.616732	0.579501	--	isoflavone 7-O-glucoside-6''-O-malonyltransferase	--	51.9246	19.9207	23.0487	23.0894	14.3476	PREDICTED: anthocyanin 5-aromatic acyltransferase-like [Nicotiana tomentosiformis]	--	--	Malonyl-coenzyme:anthocyanin 5-O-glucoside-6'''-O-malonyltransferase OS=Salvia splendens GN=5MAT1 PE=1 SV=1	Transferase family	--	transferase activity, transferring acyl groups other than amino-acyl groups	--
Tai6.8584	0.333333	0	0.263566	0.72093	0.682671	--	L-tryptophan---pyruvate aminotransferase	--	8.39087	8.24421	8.85389	7.39665	11.0436	PREDICTED: pollen-specific leucine-rich repeat extensin-like protein 1 [Eucalyptus grandis]>gi|629086562|gb|KCW52919.1| hypothetical protein EUGRSUZ_J02234 [Eucalyptus grandis]	--	--	--	Fibrinogen alpha/beta chain family//ABC transporter C-terminal domain//Baculovirus polyhedron envelope protein, PEP, C terminus//Prefoldin subunit//Bacillus haemolytic enterotoxin (HBL)	platelet activation//protein folding//protein polymerization//pathogenesis//signal transduction	protein binding, bridging//receptor binding//unfolded protein binding//structural molecule activity//DNA binding	--
Tai6.8574	0.835997	0.640954	0.596045	0.474411	0.505655	Molecular Function:protein binding (GO:0005515),Molecular Function:metal ion binding (GO:0046872),Biological Process:oxidation-reduction process (GO:0055114)	linoleate 9S-lipoxygenase	--	37.9582	12.9348	59.5342	5.45051	5.21275	lipoxygenase LOX1 [Ipomoea nil]	Ipomoea nil lipoxygenase LOX1 mRNA, complete cds	linoleate 9S-lipoxygenase	Probable linoleate 9S-lipoxygenase 5 OS=Solanum tuberosum GN=LOX1.5 PE=2 SV=1	PLAT/LH2 domain	--	protein binding	--
Tai6.856	1	1.16322	0.880388	0.711554	0.883624	Molecular Function:nucleic acid binding (GO:0003676),Cellular Component:nucleus (GO:0005634)	cleavage and polyadenylation specificity factor subunit 1	--	28.2542	24.6698	26.5332	32.4416	33.3587	PREDICTED: cleavage and polyadenylation specificity factor subunit 1 isoform X1 [Nicotiana sylvestris]	PREDICTED: Solanum tuberosum cleavage and polyadenylation specificity factor subunit 1-like (LOC102605072), mRNA	cleavage and polyadenylation specificity factor subunit 1	Cleavage and polyadenylation specificity factor subunit 1 OS=Arabidopsis thaliana GN=CPSF160 PE=1 SV=2	CPSF A subunit region	--	nucleic acid binding	mRNA cleavage and polyadenylation factor II complex, subunit CFT1 (CPSF subunit)
Tai6.8551	0.905284	0.479167	0.440152	0.350174	0.279337	Molecular Function:nucleic acid binding (GO:0003676)	elongation factor 1-alpha	RNA recognition motif (RRM) domain	0.0224997	0	0	0	0.0245587	unnamed protein product [Coffea canephora]	PREDICTED: Nicotiana sylvestris polyadenylate-binding protein RBP47C-like (LOC104216507), mRNA	--	Polyadenylate-binding protein RBP47 OS=Nicotiana plumbaginifolia GN=RBP47 PE=1 SV=1	RNA binding motif//RNA recognition motif//Herpesvirus large structural phosphoprotein UL32//RNA recognition motif. (a.k.a. RRM, RBD, or RNP domain)	--	structural molecule activity//nucleic acid binding//RNA binding	--
Tai6.8534	0.835086	0.376972	0.282037	0.18855	0.190965	Molecular Function:peroxidase activity (GO:0004601),Biological Process:response to oxidative stress (GO:0006979),Molecular Function:heme binding (GO:0020037),Biological Process:oxidation-reduction process (GO:0055114)	peroxidase	--	1.9146	0.448151	0.129582	0.0530709	0.13561	anionic peroxidase swpa2 [Ipomoea batatas]>gi|27448825|gb|AAO13969.1|AF453791_1 anionic peroxidase [Ipomoea batatas]	AF109124 Ipomoea batatas anionic peroxidase swpa2 (swpa2) mRNA, complete cds	peroxidase	Anionic peroxidase OS=Ipomoea batatas PE=1 SV=1	Peroxidase//7 transmembrane receptor (rhodopsin family)	G-protein coupled receptor signaling pathway//response to oxidative stress//oxidation-reduction process//obsolete peroxidase reaction	G-protein coupled receptor activity//heme binding//metal ion binding//peroxidase activity	--
Tai6.8533	0.965154	0.339652	0.318206	0.21367	0.182984	Molecular Function:peroxidase activity (GO:0004601),Biological Process:response to oxidative stress (GO:0006979),Molecular Function:heme binding (GO:0020037),Biological Process:oxidation-reduction process (GO:0055114)	peroxidase	--	26.5496	1.42799	1.92545	0.253722	0.799227	anionic peroxidase swpa6 [Ipomoea batatas]	I.batatas mRNa for neutral peroxidase	peroxidase	Neutral peroxidase OS=Ipomoea batatas PE=1 SV=1	Peroxidase	response to oxidative stress//obsolete peroxidase reaction//oxidation-reduction process	heme binding//peroxidase activity	--
Tai6.8522	1.28503	0.783286	0.473467	0	0	Biological Process:protein glycosylation (GO:0006486),Molecular Function:fucosyltransferase activity (GO:0008417),Cellular Component:membrane (GO:0016020)	glycoprotein 3-alpha-L-fucosyltransferase	--	107.81	83.921	83.8678	98.9222	115.134	PREDICTED: glycoprotein 3-alpha-L-fucosyltransferase A [Sesamum indicum]	PREDICTED: Nicotiana sylvestris glycoprotein 3-alpha-L-fucosyltransferase A-like (LOC104237589), mRNA	glycoprotein 3-alpha-L-fucosyltransferase	Glycoprotein 3-alpha-L-fucosyltransferase A OS=Arabidopsis thaliana GN=FUT11 PE=2 SV=1	Glycosyltransferase family 10 (fucosyltransferase) C-term	protein glycosylation	fucosyltransferase activity	Fucosyltransferase
Tai6.8513	1.06939	1.09163	0.786356	1.12798	0.892857	--	xanthoxin dehydrogenase	NAD(P)-dependent dehydrogenase, short-chain alcohol dehydrogenase family	123.875	18.21	3.75532	2.41648	1.09904	short chain alcohol dehydrogenase, putative [Ricinus communis]>gi|223536947|gb|EEF38585.1| short chain alcohol dehydrogenase, putative [Ricinus communis]	--	--	Secoisolariciresinol dehydrogenase (Fragment) OS=Forsythia intermedia PE=1 SV=1	short chain dehydrogenase//3-hydroxyacyl-CoA dehydrogenase, NAD binding domain//D-isomer specific 2-hydroxyacid dehydrogenase, NAD binding domain//NAD dependent epimerase/dehydratase family//3-beta hydroxysteroid dehydrogenase/isomerase family	fatty acid metabolic process//estrogen metabolic process//C21-steroid hormone metabolic process//tryptophan metabolic process//metabolic process//isoleucine catabolic process//valine catabolic process//benzoate metabolic process//androgen metabolic process//lysine catabolic process//acyl-carrier-protein biosynthetic process//fatty acid biosynthetic process//steroid biosynthetic process//leucine c…	catalytic activity//coenzyme binding//NAD binding//nucleotide binding//3-beta-hydroxy-delta5-steroid dehydrogenase activity//3-oxoacyl-[acyl-carrier-protein] reductase (NADPH) activity//oxidoreductase activity//3-hydroxyacyl-CoA dehydrogenase activity//oxidoreductase activity, acting on the CH-OH group of donors, NAD or NADP as acceptor	--
Tai6.8504	1.08181	0.968066	1.05798	0.845602	0.789358	Molecular Function:galactokinase activity (GO:0004335),Molecular Function:ATP binding (GO:0005524),Biological Process:galactose metabolic process (GO:0006012),Biological Process:carbohydrate phosphorylation (GO:0046835)	N-acetylgalactosamine kinase	Galactokinase	41.4806	22.6655	25.3587	34.1708	26.2811	PREDICTED: galactokinase [Sesamum indicum]	PREDICTED: Nicotiana tomentosiformis galactokinase-like (LOC104110994), mRNA	N-acetylgalactosamine kinase	Galactokinase OS=Arabidopsis thaliana GN=GAL1 PE=1 SV=2	--	--	--	Galactokinase
Tai6.8499	0.868807	0.947401	0.907468	0.717043	0.677694	Biological Process:protein folding (GO:0006457),Cellular Component:prefoldin complex (GO:0016272)	phosphatidylinositol-binding clathrin assembly protein	--	64.849	48.0203	56.0927	74.3273	67.1509	PREDICTED: probable prefoldin subunit 3-like [Solanum tuberosum]	PREDICTED: Solanum tuberosum probable prefoldin subunit 3-like (LOC102583427), mRNA	--	Probable prefoldin subunit 3 OS=Arabidopsis thaliana GN=At5g49510 PE=1 SV=1	Orbivirus VP3 (T2) protein//Carboxypeptidase activation peptide	proteolysis	structural molecule activity//carboxypeptidase activity	Molecular chaperone Prefoldin, subunit 3
Tai6.8465	1.0519	1.94971	1.66451	0.949183	1.1752	Biological Process:proteolysis (GO:0006508),Molecular Function:peptidase activity (GO:0008233)	proline iminopeptidase	Pimeloyl-ACP methyl ester carboxylesterase	0.0318083	0.0533383	0	0.0587615	0.0702373	unnamed protein product [Vitis vinifera]	PREDICTED: Nicotiana tomentosiformis proline iminopeptidase (LOC104113488), transcript variant X1, mRNA	proline iminopeptidase	Proline iminopeptidase OS=Arabidopsis thaliana GN=PIP PE=2 SV=3	Serine carboxypeptidase S28	proteolysis	serine-type peptidase activity	--
Tai6.844	1.03518	1.59938	0.883905	0	0	Molecular Function:structural constituent of ribosome (GO:0003735),Cellular Component:ribosome (GO:0005840),Biological Process:translation (GO:0006412)	small subunit ribosomal protein S13e	--	0.890291	1.23889	0.450826	1.45811	0.629424	PREDICTED: 40S ribosomal protein S13 [Vitis vinifera]	Camellia sinensis clone U10BcDNA 2965 ribosomal protein s13 mRNA, partial cds	small subunit ribosomal protein S13e	40S ribosomal protein S13 OS=Glycine max GN=RPS13 PE=2 SV=1	Ribosomal S13/S15 N-terminal domain	ribosome biogenesis//translation	structural constituent of ribosome	40S ribosomal protein S13
Tai6.8427	0.333333	0.901515	0.848706	0.547122	0.487697	Cellular Component:nucleosome (GO:0000786),Molecular Function:DNA binding (GO:0003677),Cellular Component:nucleus (GO:0005634)	histone H4	--	12.2676	9.36707	7.4247	8.27842	9.42127	Histone H4 [Aegilops tauschii]	PREDICTED: Erythranthe guttatus histone H4 (LOC105968615), mRNA	--	Histone H4 OS=Sterkiella nova PE=3 SV=2	TATA box binding protein associated factor (TAF)//Core histone H2A/H2B/H3/H4//Transcription initiation factor IID, 31kD subunit	DNA-templated transcription, initiation	DNA binding	--
Tai6.8423	1.00169	1.1286	0.91456	1.3237	1.08863	Molecular Function:protein kinase activity (GO:0004672),Molecular Function:ATP binding (GO:0005524),Biological Process:protein phosphorylation (GO:0006468)	dual specificity tyrosine-phosphorylation-regulated kinase 2/3/4	Serine/threonine protein kinase	11.3119	22.7231	14.2974	27.1384	24.4854	PREDICTED: uncharacterized protein LOC102605840 isoform X1 [Solanum tuberosum]	PREDICTED: Nicotiana tomentosiformis uncharacterized LOC104112395 (LOC104112395), transcript variant X1, mRNA	--	Dual specificity protein kinase pom1 OS=Schizosaccharomyces pombe (strain 972 / ATCC 24843) GN=pom1 PE=1 SV=1	Protein tyrosine kinase//Lipopolysaccharide kinase (Kdo/WaaP) family//Protein kinase domain	protein phosphorylation	phosphotransferase activity, alcohol group as acceptor//protein kinase activity//ATP binding	Dual-specificity tyrosine-phosphorylation regulated kinase
Tai6.8404	0.922121	0.765811	0.521127	0	0	Molecular Function:GTPase activity (GO:0003924),Molecular Function:structural constituent of cytoskeleton (GO:0005200),Molecular Function:GTP binding (GO:0005525),Cellular Component:microtubule (GO:0005874),Biological Process:microtubule-based process (GO:0007017)	tubulin beta	--	169.937	429.149	399.202	389.117	360.66	beta-tubulin 7a [Linum usitatissimum]	Eutrema salsugineum hypothetical protein (EUTSA_v10010369mg) mRNA, complete cds	tubulin beta	Tubulin beta chain OS=Hordeum vulgare GN=TUBB PE=2 SV=1	Tubulin/FtsZ family, GTPase domain	--	GTPase activity	--
Tai6.8403	0.953753	1.1302	1.10804	1.0261	1.11675	--	neutral ceramidase	--	16.299	19.8679	16.211	17.7261	18.4715	PREDICTED: LOW QUALITY PROTEIN: neutral ceramidase [Populus euphratica]	PREDICTED: Nicotiana sylvestris neutral ceramidase-like (LOC104231273), mRNA	neutral ceramidase	Neutral ceramidase OS=Arabidopsis thaliana GN=At2g38010 PE=3 SV=1	--	--	--	Ceramidases
Tai6.8390	1.01994	1.0801	1.03182	1.21758	0.830957	--	26S proteasome regulatory subunit N6	--	138.677	324.456	451.397	429.095	509.528	PREDICTED: pollen-specific protein C13-like [Nicotiana tomentosiformis]	--	--	Olee1-like protein OS=Betula pendula PE=2 SV=1	--	--	--	--
Tai6.8352	1.01929	1.3087	1.32016	1.17949	1.2785	Biological Process:isoprenoid biosynthetic process (GO:0008299)	--	Geranylgeranyl pyrophosphate synthase	126.92	279.889	326.649	247.517	305.458	PREDICTED: heterodimeric geranylgeranyl pyrophosphate synthase small subunit, chloroplastic [Sesamum indicum]	Nicotiana tabacum geranylgeranyl pyrophosphate synthase 5 mRNA, complete cds	geranylgeranyl diphosphate synthase, type II	Heterodimeric geranylgeranyl pyrophosphate synthase small subunit, chloroplastic OS=Arabidopsis thaliana GN=GGR PE=1 SV=2	Polyprenyl synthetase	isoprenoid biosynthetic process	--	--
Tai6.8351	0.910456	0.755392	0.796715	0.690662	0.784038	Biological Process:oxidation-reduction process (GO:0055114)	isocitrate dehydrogenase (NAD+)	Isocitrate/isopropylmalate dehydrogenase	5.91505	9.59003	9.59449	8.3772	9.84504	PREDICTED: isocitrate dehydrogenase [NAD] regulatory subunit 1, mitochondrial [Nicotiana sylvestris]	PREDICTED: Nicotiana tomentosiformis isocitrate dehydrogenase [NAD] regulatory subunit 1, mitochondrial (LOC104099916), mRNA	isocitrate dehydrogenase (NAD+)	Isocitrate dehydrogenase [NAD] regulatory subunit 1, mitochondrial OS=Arabidopsis thaliana GN=IDH1 PE=2 SV=2	Isocitrate/isopropylmalate dehydrogenase	oxidation-reduction process	oxidoreductase activity, acting on the CH-OH group of donors, NAD or NADP as acceptor	Isocitrate dehydrogenase, gamma subunit
Tai6.8335	0.927083	1.13649	1.17187	1.17093	1.09974	Cellular Component:cytoplasm (GO:0005737),Biological Process:oxidation-reduction process (GO:0055114)	dihydropyrimidine dehydrogenase (NADP+)	Dihydroorotate dehydrogenase	188.729	153.354	133.086	119.35	150.928	PREDICTED: dihydropyrimidine dehydrogenase [NADP(+)]-like [Solanum tuberosum]	PREDICTED: Nicotiana sylvestris dihydropyrimidine dehydrogenase [NADP(+)] (LOC104250053), mRNA	dihydropyrimidine dehydrogenase (NADP+)	Dihydropyrimidine dehydrogenase (NADP(+)), chloroplastic OS=Arabidopsis thaliana GN=PYD1 PE=1 SV=1	Dihydrouridine synthase (Dus)//Dihydroorotate dehydrogenase//FMN-dependent dehydrogenase//Conserved region in glutamate synthase	oxidation-reduction process//tRNA processing//glutamate biosynthetic process	oxidoreductase activity, acting on the CH-CH group of donors//oxidoreductase activity, acting on the CH-NH2 group of donors//tRNA dihydrouridine synthase activity//glutamate synthase activity//oxidoreductase activity//flavin adenine dinucleotide binding	Dihydropyrimidine dehydrogenase
Tai6.8306	1.25871	1.79872	1.1053	0.512304	0.70962	Molecular Function:methyltransferase activity (GO:0008168)	metal transporter CNNM	--	18.3679	37.1426	47.0478	44.7337	50.1649	PREDICTED: probable methyltransferase PMT13 [Nicotiana tomentosiformis]	PREDICTED: Nicotiana sylvestris probable methyltransferase PMT13 (LOC104231190), mRNA	--	Probable methyltransferase PMT13 OS=Arabidopsis thaliana GN=At4g00740 PE=2 SV=1	2-vinyl bacteriochlorophyllide hydratase (BCHF)//Putative S-adenosyl-L-methionine-dependent methyltransferase//Methyltransferase domain	bacteriochlorophyll biosynthetic process//metabolic process//photosynthesis, dark reaction	hydro-lyase activity//methyltransferase activity	--
Tai6.8303	0.974394	1.51303	1.5932	1.44579	1.33423	Biological Process:metabolic process (GO:0008152),Molecular Function:uridylyltransferase activity (GO:0070569)	UDP-sugar pyrophosphorylase	UDP-N-acetylglucosamine pyrophosphorylase	17.7308	26.9258	19.6631	20.3018	21.6605	PREDICTED: UDP-sugar pyrophosphorylase [Nicotiana tomentosiformis]>gi|697149185|ref|XP_009628796.1| PREDICTED: UDP-sugar pyrophosphorylase [Nicotiana tomentosiformis]	PREDICTED: Nicotiana sylvestris UDP-sugar pyrophosphorylase (LOC104232978), transcript variant X2, mRNA	UDP-sugar pyrophosphorylase	UDP-sugar pyrophosphorylase OS=Cucumis melo GN=USP PE=1 SV=1	UTP--glucose-1-phosphate uridylyltransferase	metabolic process	uridylyltransferase activity	--
Tai6.8283	0.94697	1.09814	0.709711	0	0	Molecular Function:protein binding (GO:0005515)	photosystem II oxygen-evolving enhancer protein 2	Tetratricopeptide (TPR) repeat	2.08074	3.87684	6.63998	4.65104	3.61798	PREDICTED: uncharacterized protein ycf37 [Nicotiana sylvestris]	Ricinus communis tetratricopeptide repeat protein, tpr, putative, mRNA	--	Uncharacterized protein ycf37 OS=Guillardia theta GN=ycf37 PE=3 SV=1	Tetratricopeptide repeat//Tetratricopeptide repeat//Tetratricopeptide repeat//Tetratricopeptide repeat//Tetratricopeptide repeat//Tetratricopeptide repeat//TPR repeat	--	protein binding	--
Tai6.8259	0.969214	1.04069	1.18744	1.56522	1.35779	Molecular Function:GTP binding (GO:0005525)	Arf/Sar family, other	--	51.194	52.7226	55.0964	44.2642	48.0488	PREDICTED: ADP-ribosylation factor-like [Solanum tuberosum]	--	Arf/Sar family, other	ADP-ribosylation factor OS=Dugesia japonica PE=2 SV=3	ADP-ribosylation factor family	--	GTP binding	GTP-binding ADP-ribosylation factor Arf1
Tai6.8232	1.03318	1.16667	1.26195	1.33455	1.18869	Molecular Function:catalytic activity (GO:0003824),Biological Process:metabolic process (GO:0008152)	long-chain acyl-CoA synthetase	Long-chain acyl-CoA synthetase (AMP-forming)	0.0191856	0.0100315	0.0286322	0.0133014	0	PREDICTED: long chain acyl-CoA synthetase 8-like isoform X1 [Solanum tuberosum]>gi|565373995|ref|XP_006353550.1| PREDICTED: long chain acyl-CoA synthetase 8-like isoform X2 [Solanum tuberosum]	PREDICTED: Nicotiana sylvestris long chain acyl-CoA synthetase 8-like (LOC104213418), mRNA	long-chain acyl-CoA synthetase	Long chain acyl-CoA synthetase 8 OS=Arabidopsis thaliana GN=LACS8 PE=1 SV=1	SET domain//AMP-binding enzyme	metabolic process	catalytic activity//protein binding	Acyl-CoA synthetase
Tai6.8229	0.947948	0.640891	0.413163	0	0	Molecular Function:structural constituent of ribosome (GO:0003735),Cellular Component:intracellular (GO:0005622),Cellular Component:ribosome (GO:0005840),Biological Process:translation (GO:0006412)	large subunit ribosomal protein L9	Ribosomal protein L9	5.54311	7.7298	9.44299	9.29617	8.78429	unnamed protein product [Coffea canephora]	--	large subunit ribosomal protein L9	--	--	--	--	--
Tai6.8227	0.975793	0.983971	1.1915	1.64912	1.86952	Biological Process:metabolic process (GO:0008152)	acetyl-CoA C-acetyltransferase	Acetyl-CoA acetyltransferase	4.70022	4.9809	4.17308	5.57777	3.84267	PREDICTED: acetyl-CoA acetyltransferase, cytosolic 1-like [Solanum tuberosum]	PREDICTED: Nicotiana tomentosiformis acetyl-CoA acetyltransferase, cytosolic 1 (LOC104088023), mRNA	acetyl-CoA C-acetyltransferase	Acetyl-CoA acetyltransferase, cytosolic 1 OS=Arabidopsis thaliana GN=AAT1 PE=2 SV=1	Thiolase, N-terminal domain//Herpesvirus latent membrane protein 1 (LMP1)//3-Oxoacyl-[acyl-carrier-protein (ACP)] synthase III//Thiolase, C-terminal domain	acyl-carrier-protein biosynthetic process//fatty acid biosynthetic process//metabolic process//transformation of host cell by virus	transferase activity, transferring acyl groups other than amino-acyl groups//3-oxoacyl-[acyl-carrier-protein] synthase activity	Acetyl-CoA acetyltransferase
Tai6.8224	0.333333	0	0.101456	0.422757	0.330808	Biological Process:actin filament organization (GO:0007015),Molecular Function:actin filament binding (GO:0051015)	glucan 1,3-beta-glucosidase	--	34.9113	0.211958	0.688602	0.403692	0.523788	unnamed protein product [Coffea canephora]	--	--	--	--	--	--	--
Tai6.8223	0.861704	0.113739	0.0586791	0	0	Biological Process:carbohydrate metabolic process (GO:0005975),Biological Process:actin filament organization (GO:0007015),Molecular Function:actin filament binding (GO:0051015)	glucan 1,3-beta-glucosidase	Aryl-phospho-beta-D-glucosidase BglC, GH1 family	126.119	0.83751	2.29363	0.567074	1.56436	PREDICTED: probable glucan 1,3-beta-glucosidase A isoform X2 [Nicotiana tomentosiformis]	--	--	Glucan 1,3-beta-glucosidase OS=Yarrowia lipolytica (strain CLIB 122 / E 150) GN=EXG1 PE=3 SV=2	Cellulase (glycosyl hydrolase family 5)//Beta-galactosidase	carbohydrate metabolic process//glycerolipid metabolic process//glycosphingolipid metabolic process//galactose metabolic process//glycosaminoglycan catabolic process	beta-galactosidase activity//hydrolase activity, hydrolyzing O-glycosyl compounds	--
Tai6.8216	1.10645	1.72736	1.31914	1.11703	1.14891	Molecular Function:protein binding (GO:0005515)	synaptotagmin-7	--	30.6398	37.9182	30.3567	38.7433	42.8869	PREDICTED: multiple C2 and transmembrane domain-containing protein 2-like [Sesamum indicum]	PREDICTED: Solanum lycopersicum multiple C2 and transmembrane domain-containing protein 1-like (LOC101257134), mRNA	--	Protein QUIRKY OS=Arabidopsis thaliana GN=QKY PE=2 SV=1	C2 domain	--	protein binding	--
Tai6.8213	0.892388	1.06693	0.665682	0	0	Molecular Function:protein kinase activity (GO:0004672),Molecular Function:ATP binding (GO:0005524),Biological Process:protein phosphorylation (GO:0006468),Molecular Function:carbohydrate binding (GO:0030246)	interleukin-1 receptor-associated kinase 1	Serine/threonine protein kinase	3.07733	15.9535	13.7436	16.2818	37.7277	PREDICTED: L-type lectin-domain containing receptor kinase S.4-like [Solanum lycopersicum]	Morus notabilis L-type lectin-domain containing receptor kinase S.4 partial mRNA	--	L-type lectin-domain containing receptor kinase S.4 OS=Arabidopsis thaliana GN=LECRKS4 PE=2 SV=1	Legume lectin domain//Protein tyrosine kinase//Protein kinase domain	protein phosphorylation	ATP binding//protein kinase activity//carbohydrate binding	--
Tai6.8195	1.05717	0.716758	0.43627	0.243478	0.238609	--	zeta-carotene desaturase	Phospholipase/lecithinase/hemolysin	27.4768	2.69925	1.76323	0.525034	0.628353	PREDICTED: GDSL esterase/lipase At1g28580-like [Nicotiana sylvestris]	--	--	GDSL esterase/lipase At1g28590 OS=Arabidopsis thaliana GN=At1g28590 PE=2 SV=2	Fibroin light chain (L-fibroin)//GDSL-like Lipase/Acylhydrolase	--	hydrolase activity, acting on ester bonds	--
Tai6.8188	1.22125	1.21333	1.23755	1.1907	1.26299	--	--	--	14.4399	18.9685	28.024	27.1234	26.0365	PREDICTED: uncharacterized protein LOC105968861 [Erythranthe guttatus]>gi|604315365|gb|EYU28071.1| hypothetical protein MIMGU_mgv1a014197mg [Erythranthe guttata]	PREDICTED: Beta vulgaris subsp. vulgaris uncharacterized LOC104900570 (LOC104900570), mRNA	--	--	--	--	--	--
Tai6.8178	0.880952	0.459821	0.359906	0	0	Molecular Function:protein binding (GO:0005515)	COMPASS component SWD3	--	85.335	99.1945	99.7489	87.6419	109.65	PREDICTED: topless-related protein 4-like isoform X1 [Nicotiana sylvestris]	PREDICTED: Nicotiana tomentosiformis topless-related protein 4-like (LOC104091445), transcript variant X2, mRNA	--	Topless-related protein 4 OS=Arabidopsis thaliana GN=TPR4 PE=1 SV=2	--	--	--	--
Tai6.8167	1.01521	0.65786	0.462236	0	0	Biological Process:defense response (GO:0006952),Cellular Component:integral component of membrane (GO:0016021)	mlo protein	--	0.015837	0.0505777	0	0	0	PREDICTED: MLO-like protein 8 [Nicotiana tomentosiformis]	PREDICTED: Nicotiana tomentosiformis MLO-like protein 8 (LOC104111508), mRNA	mlo protein	MLO-like protein 8 OS=Arabidopsis thaliana GN=MLO8 PE=1 SV=2	Alpha amylase inhibitor//Mlo family	defense response	alpha-amylase inhibitor activity	--
Tai6.8157	0.718223	1.24838	0.627108	0	0	Molecular Function:oxidoreductase activity (GO:0016491),Biological Process:oxidation-reduction process (GO:0055114)	thioredoxin reductase (NADPH)	Thioredoxin reductase	28.8618	9.71859	10.1801	5.7978	7.22194	PREDICTED: thioredoxin reductase NTRB-like [Sesamum indicum]	Prunus persica hypothetical protein (PRUPE_ppa007040mg) mRNA, complete cds	thioredoxin reductase (NADPH)	Thioredoxin reductase 1 OS=Arabidopsis thaliana GN=NTR1 PE=1 SV=3	Putative NAD(P)-binding//FAD binding domain//Pyridine nucleotide-disulphide oxidoreductase//Pyridine nucleotide-disulphide oxidoreductase//FAD dependent oxidoreductase//Glucose inhibited division protein A	siroheme biosynthetic process//tRNA processing//oxidation-reduction process//porphyrin-containing compound biosynthetic process	flavin adenine dinucleotide binding//precorrin-2 dehydrogenase activity//oxidoreductase activity//FAD binding	Thioredoxin reductase
Tai6.8148	0.813091	0.718191	0.881158	0.862174	0.923801	Molecular Function:pyridoxal phosphate binding (GO:0030170),Molecular Function:cysteine desulfurase activity (GO:0031071),Biological Process:[2Fe-2S] cluster assembly (GO:0044571)	cysteine desulfurase	Cysteine sulfinate desulfinase/cysteine desulfurase or related enzyme	5.05309	4.53696	3.80524	5.02453	3.89065	PREDICTED: cysteine desulfurase 1, mitochondrial [Sesamum indicum]	PREDICTED: Nicotiana tomentosiformis cysteine desulfurase 1, mitochondrial (LOC104110646), mRNA	cysteine desulfurase	Cysteine desulfurase, mitochondrial OS=Arabidopsis thaliana GN=NIFS1 PE=1 SV=1	Sigma-70 region 3//Pyridoxal-dependent decarboxylase conserved domain//Beta-eliminating lyase//Flavocytochrome c sulphide dehydrogenase, flavin-binding	carboxylic acid metabolic process//DNA-templated transcription, initiation//regulation of transcription, DNA-templated//cellular amino acid metabolic process//oxidation-reduction process	flavin adenine dinucleotide binding//oxidoreductase activity//carboxy-lyase activity//pyridoxal phosphate binding//sigma factor activity//lyase activity//transcription factor activity, sequence-specific DNA binding//DNA binding	Cysteine desulfurase NFS1
Tai6.8145	1.0135	1.25834	1.12648	0.991694	1.1654	--	potassium voltage-gated channel Shaker-related subfamily A, beta member 2	Predicted oxidoreductase (related to aryl-alcohol dehydrogenase)	268.736	234.001	261.773	265.092	334.814	PREDICTED: probable voltage-gated potassium channel subunit beta [Solanum lycopersicum]	PREDICTED: Sesamum indicum probable voltage-gated potassium channel subunit beta (LOC105171846), mRNA	--	Probable voltage-gated potassium channel subunit beta OS=Arabidopsis thaliana GN=KAB1 PE=1 SV=1	--	--	--	Voltage-gated shaker-like K+ channel, subunit beta/KCNAB
Tai6.814	0.782759	0.506322	0.56243	0.821231	0.859726	--	pre-mRNA-splicing helicase BRR2	--	29.3863	20.5412	21.0427	19.6873	21.8319	PREDICTED: dnaJ protein ERDJ2A-like [Nicotiana tomentosiformis]>gi|697190154|ref|XP_009604133.1| PREDICTED: dnaJ protein ERDJ2A-like [Nicotiana tomentosiformis]	Populus trichocarpa DNAJ heat shock N-terminal domain-containing family protein (POPTR_0004s07070g) mRNA, complete cds	translocation protein SEC63	DnaJ protein ERDJ2A OS=Arabidopsis thaliana GN=ERDJ2A PE=1 SV=1	--	--	--	Molecular chaperone (DnaJ superfamily)
Tai6.8139	1.02002	1.23026	0.715981	0	0	Molecular Function:acetylglucosaminyltransferase activity (GO:0008375),Cellular Component:membrane (GO:0016020)	protein xylosyltransferase	--	13.425	25.4701	21.9841	24.7857	23.0455	PREDICTED: xylosyltransferase 1-like isoform X1 [Nicotiana tomentosiformis]	PREDICTED: Gossypium raimondii xylosyltransferase 1 (LOC105776715), transcript variant X2, mRNA	--	Xylosyltransferase 1 (Fragment) OS=Rattus norvegicus GN=Xylt1 PE=2 SV=1	Adenylate cyclase associated (CAP) N terminal//Core-2/I-Branching enzyme	cytoskeleton organization	acetylglucosaminyltransferase activity//actin binding	--
Tai6.8126	0.876712	1.21567	1.09346	1.52282	1.45597	Molecular Function:peroxidase activity (GO:0004601),Biological Process:response to oxidative stress (GO:0006979),Molecular Function:heme binding (GO:0020037),Biological Process:oxidation-reduction process (GO:0055114)	peroxidase	--	0.0858225	0	0	0.0508645	0	PREDICTED: peroxidase 47 [Nicotiana sylvestris]	Ipomoea batatas anionic peroxidase swpa7 mRNA, complete cds	peroxidase	Peroxidase 47 OS=Arabidopsis thaliana GN=PER47 PE=2 SV=2	Peroxidase	oxidation-reduction process//obsolete peroxidase reaction//response to oxidative stress	peroxidase activity//heme binding	--
Tai6.8124	0.741773	0.477739	0.329075	0	0	--	acyl-coenzyme A thioesterase 13	Acyl-coenzyme A thioesterase PaaI, contains HGG motif	5.74905	5.33277	5.95739	10.0083	8.15275	PREDICTED: acyl-coenzyme A thioesterase 13 [Nicotiana sylvestris]	PREDICTED: Nicotiana tomentosiformis acyl-coenzyme A thioesterase 13 (LOC104098406), mRNA	acyl-coenzyme A thioesterase 13	Acyl-coenzyme A thioesterase 13 OS=Mus musculus GN=Acot13 PE=1 SV=1	--	--	--	HGG motif-containing thioesterase
Tai6.8118	1.00675	0.321328	0.323818	0.359142	0.400187	Molecular Function:manganese ion binding (GO:0030145),Molecular Function:nutrient reservoir activity (GO:0045735)	SET and MYND domain-containing protein	--	0.230011	0	0	0	0	PREDICTED: germin-like protein subfamily 1 member 20-like [Solanum tuberosum]	Solanum pennellii chromosome ch01, complete genome	--	Germin-like protein subfamily 1 member 13 OS=Arabidopsis thaliana GN=GLP6 PE=2 SV=2	Cupin//ATP synthase alpha/beta family, nucleotide-binding domain	--	nutrient reservoir activity//ATP binding	--
Tai6.8114	1.07209	0.670858	0.492037	0	0	Molecular Function:protein binding (GO:0005515)	glutathione S-transferase	Glutathione S-transferase	4.65242	3.02906	4.71873	2.42483	2.80718	PREDICTED: glutathione S-transferase U17-like [Nicotiana sylvestris]	--	glutathione S-transferase	Glutathione S-transferase U17 OS=Arabidopsis thaliana GN=GSTU17 PE=2 SV=1	Glutathione S-transferase, N-terminal domain//Glutathione S-transferase, N-terminal domain//Glutathione S-transferase, N-terminal domain	--	protein binding	--
Tai6.8111	0.861862	0.814815	0.325075	0	0	Molecular Function:protein kinase activity (GO:0004672),Molecular Function:protein binding (GO:0005515),Molecular Function:ATP binding (GO:0005524),Biological Process:protein phosphorylation (GO:0006468)	LRR receptor-like serine/threonine-protein kinase FLS2	Leucine-rich repeat (LRR) protein	3.62289	4.85166	3.05147	4.80802	3.86584	PREDICTED: probable LRR receptor-like serine/threonine-protein kinase At1g14390 [Nicotiana sylvestris]	--	--	Probable LRR receptor-like serine/threonine-protein kinase At1g14390 OS=Arabidopsis thaliana GN=At1g14390 PE=2 SV=1	Protein kinase domain//Leucine rich repeat//Leucine Rich repeat//Leucine Rich Repeat//Protein tyrosine kinase	protein phosphorylation	ATP binding//protein binding//protein kinase activity	--
Tai6.8093	0.89581	1.3515	1.28065	1.41466	1.47281	--	nascent polypeptide-associated complex subunit beta	--	16.5153	24.1361	26.4268	16.7249	14.3676	PREDICTED: transcription factor BTF3 homolog 4-like [Cicer arietinum]	PREDICTED: Nicotiana sylvestris transcription factor BTF3 homolog 4-like (LOC104242433), mRNA	nascent polypeptide-associated complex subunit beta	Transcription factor BTF3 homolog 4 OS=Xenopus laevis GN=btf3l4 PE=2 SV=1	SNF2 family N-terminal domain//KIX domain	regulation of transcription, DNA-templated	ATP binding//transcription cofactor activity	RNA polymerase II general transcription factor BTF3 and related proteins
Tai6.8075	0.95547	0.96999	0.656341	0	0	Molecular Function:DNA binding (GO:0003677),Molecular Function:DNA helicase activity (GO:0003678),Molecular Function:ATP binding (GO:0005524),Cellular Component:nucleus (GO:0005634),Biological Process:DNA replication initiation (GO:0006270),Cellular Component:MCM complex (GO:0042555)	DNA replication licensing factor MCM7	--	13.4397	14.2491	30.2541	23.5188	32.9517	PREDICTED: DNA replication licensing factor MCM7 [Nicotiana tomentosiformis]	PREDICTED: Nicotiana sylvestris DNA replication licensing factor MCM7 (LOC104243263), mRNA	DNA replication licensing factor MCM7	DNA replication licensing factor MCM7 OS=Arabidopsis thaliana GN=MCM7 PE=1 SV=2	--	--	--	DNA replication licensing factor, MCM7 component
Tai6.8074	1.00969	0.766611	0.651836	0.481238	0.727672	Molecular Function:DNA binding (GO:0003677),Molecular Function:DNA helicase activity (GO:0003678),Molecular Function:ATP binding (GO:0005524),Cellular Component:nucleus (GO:0005634),Biological Process:DNA replication (GO:0006260),Biological Process:DNA replication initiation (GO:0006270),Cellular Component:MCM complex (GO:0042555)	DNA replication licensing factor MCM7	DNA replicative helicase MCM subunit Mcm2, Cdc46/Mcm family	18.3754	17.6532	43.7632	34.561	47.9795	unnamed protein product [Coffea canephora]	PREDICTED: Nicotiana tomentosiformis DNA replication licensing factor MCM7 (LOC104093897), mRNA	DNA replication licensing factor MCM7	DNA replication licensing factor MCM7 OS=Oryza sativa subsp. japonica GN=MCM7 PE=2 SV=1	AAA domain (dynein-related subfamily)//MCM2/3/5 family//ATPase family associated with various cellular activities (AAA)	DNA replication	ATP binding//ATPase activity//DNA binding	DNA replication licensing factor, MCM7 component
Tai6.8073	0.965993	0.949449	0.86493	1.10466	1.1	Molecular Function:calcium ion binding (GO:0005509),Molecular Function:protein binding (GO:0005515)	epidermal growth factor receptor substrate 15	--	0.0351383	0.152371	0.177374	0.208608	0.192522	PREDICTED: actin cytoskeleton-regulatory complex protein PAN1-like [Solanum tuberosum]	PREDICTED: Nicotiana sylvestris epidermal growth factor receptor substrate 15-like 1 (LOC104247590), mRNA	--	Uncharacterized calcium-binding protein C800.10c OS=Schizosaccharomyces pombe (strain 972 / ATCC 24843) GN=SPBC800.10c PE=3 SV=1	Herpesvirus Glycoprotein B//EF-hand domain pair//Cytoskeletal-regulatory complex EF hand//EF hand//EF-hand domain pair//EF hand//EF-hand domain	--	protein binding//calcium ion binding	Synaptic vesicle protein EHS-1 and related EH domain proteins
Tai6.8062	0.764287	0.76674	0.711023	0.608493	0.742023	--	ubiquinone biosynthesis protein COQ9	Ubiquinone biosynthesis protein COQ9	0.51513	1.93629	2.94215	1.50442	2.10068	PREDICTED: ubiquinone biosynthesis protein COQ9, mitochondrial-like [Solanum tuberosum]	PREDICTED: Solanum tuberosum ubiquinone biosynthesis protein COQ9, mitochondrial-like (LOC102586706), mRNA	ubiquinone biosynthesis protein COQ9	Ubiquinone biosynthesis protein COQ9, mitochondrial OS=Rattus norvegicus GN=Coq9 PE=2 SV=2	--	--	--	Uncharacterized conserved protein
Tai6.8019	1.00145	0.86254	0.677489	0.632114	0.624661	--	raffinose synthase	--	0.0172547	0.194081	0.0163416	0.0406383	0.01838	PREDICTED: probable galactinol--sucrose galactosyltransferase 1 [Sesamum indicum]	PREDICTED: Nicotiana sylvestris probable galactinol--sucrose galactosyltransferase 1 (LOC104230179), mRNA	raffinose synthase	Probable galactinol--sucrose galactosyltransferase 1 OS=Arabidopsis thaliana GN=RFS1 PE=2 SV=1	CUT domain//Yersinia/Haemophilus virulence surface antigen	proteolysis//pathogenesis	DNA binding//cysteine-type endopeptidase activity	--
Tai6.8011	0.946408	1.26568	0.828962	0	0	--	--	--	0.120279	0.0216227	0.137237	0.153651	0.0853731	PREDICTED: coiled-coil domain-containing protein 22 homolog [Solanum tuberosum]	--	--	Coiled-coil domain-containing protein 22 OS=Xenopus laevis GN=ccdc22 PE=2 SV=1	ABC transporter C-terminal domain	--	DNA binding	Uncharacterized conserved protein
Tai6.8009	0.999633	1.24972	0.684268	0	0	--	--	--	43.448	51.6482	61.7396	77.2342	65.8799	PREDICTED: uncharacterized protein LOC104236460 [Nicotiana sylvestris]	PREDICTED: Nicotiana sylvestris uncharacterized LOC104236460 (LOC104236460), mRNA	--	--	--	--	--	--
Tai6.8007	1.15718	0.995338	0.663567	0.356912	0.390353	Biological Process:transport (GO:0006810),Cellular Component:integral component of membrane (GO:0016021)	protein ERP2	--	10.2427	14.3451	9.057	10.8267	9.74773	PREDICTED: cellulose synthase-like protein E1 isoform X2 [Nicotiana sylvestris]	--	--	Transmembrane emp24 domain-containing protein p24beta2 OS=Arabidopsis thaliana GN=At3g07680 PE=1 SV=1	emp24/gp25L/p24 family/GOLD	transport	--	--
Tai6.8006	1.05791	1.0162	1.10769	1.1688	1.1785	--	ubiquitin-like domain-containing CTD phosphatase 1	--	94.2051	106.348	72.9835	72.1635	70.1309	PREDICTED: WEB family protein At5g55860 [Nicotiana sylvestris]	PREDICTED: Nicotiana sylvestris WEB family protein At5g55860 (LOC104236459), mRNA	--	WEB family protein At5g55860 OS=Arabidopsis thaliana GN=At5g55860 PE=1 SV=1	--	--	--	--
Tai6.7985	0.971014	0.450812	0.33487	0	0	Biological Process:COPII vesicle coating (GO:0048208)	--	--	66.4553	66.9588	63.5923	78.6372	71.9039	PREDICTED: uncharacterized protein LOC104105973 [Nicotiana tomentosiformis]	PREDICTED: Solanum tuberosum uncharacterized LOC102600624 (LOC102600624), mRNA	--	Protein transport protein SEC16B homolog OS=Arabidopsis thaliana GN=SEC16B PE=1 SV=1	--	--	--	--
Tai6.7979	0.86026	0.808893	0.828559	1.09643	0.853102	Molecular Function:aminoacyl-tRNA editing activity (GO:0002161)	--	--	14.1812	9.63836	13.8107	13.2402	17.4976	PREDICTED: uncharacterized protein LOC105963249 [Erythranthe guttatus]>gi|604322481|gb|EYU32867.1| hypothetical protein MIMGU_mgv1a012775mg [Erythranthe guttata]	PREDICTED: Nicotiana tomentosiformis uncharacterized LOC104099823 (LOC104099823), transcript variant X2, mRNA	--	--	Aminoacyl-tRNA editing domain	--	aminoacyl-tRNA editing activity	--
Tai6.7970	1.0198	0.727476	0.48424	0	0	Molecular Function:protein kinase activity (GO:0004672),Molecular Function:ATP binding (GO:0005524),Biological Process:protein phosphorylation (GO:0006468)	interleukin-1 receptor-associated kinase 4	Ankyrin repeat	19.1788	20.3342	18.7363	17.8207	18.9341	PREDICTED: putative receptor-like protein kinase At4g00960 [Pyrus x bretschneideri]	PREDICTED: Nicotiana sylvestris G-type lectin S-receptor-like serine/threonine-protein kinase At4g27290 (LOC104246103), transcript variant X2, mRNA	interleukin-1 receptor-associated kinase 4	Cysteine-rich receptor-like protein kinase 10 OS=Arabidopsis thaliana GN=CRK10 PE=1 SV=3	Protein tyrosine kinase//Protein kinase domain	protein phosphorylation	ATP binding//protein kinase activity	--
Tai6.7966	1.03515	1.219	1.33076	1.55915	1.36808	Molecular Function:protein binding (GO:0005515)	stress-induced-phosphoprotein 1	Predicted methyltransferase, contains TPR repeat	61.2522	96.7593	72.7165	77.2769	82.1507	PREDICTED: hsp70-Hsp90 organizing protein 3-like [Nicotiana tomentosiformis]	PREDICTED: Nicotiana tomentosiformis hsp70-Hsp90 organizing protein 3-like (LOC104099621), mRNA	stress-induced-phosphoprotein 1	Hsp70-Hsp90 organizing protein 3 OS=Arabidopsis thaliana GN=HOP3 PE=2 SV=1	TPR repeat//Tetratricopeptide repeat//Rapsyn N-terminal myristoylation and linker region//MAS20 protein import receptor//Tetratricopeptide repeat//Alkyl sulfatase dimerisation//Procyclic acidic repetitive protein (PARP)//Tetratricopeptide repeat//Tetratricopeptide repeat//Tetratricopeptide repeat	protein targeting//synaptic transmission//intracellular protein transport	protein binding//protein anchor//acetylcholine receptor binding//protein dimerization activity	Molecular co-chaperone STI1
Tai6.7961	1.05712	0.990596	1.05898	1.06496	0.906168	Molecular Function:serine-type endopeptidase activity (GO:0004252),Biological Process:proteolysis (GO:0006508)	ATP-dependent Clp protease, protease subunit	ATP-dependent protease ClpP, protease subunit	16.3581	24.3977	25.5609	24.5732	23.1209	PREDICTED: ATP-dependent Clp protease proteolytic subunit-related protein 3, chloroplastic [Nicotiana sylvestris]	PREDICTED: Solanum lycopersicum ATP-dependent Clp protease proteolytic subunit-related protein 3, chloroplastic (LOC101253726), transcript variant X2, mRNA	--	ATP-dependent Clp protease proteolytic subunit-related protein 3, chloroplastic OS=Arabidopsis thaliana GN=CLPR3 PE=1 SV=1	--	--	--	ATP-dependent Clp protease, proteolytic subunit
Tai6.7953	1.03721	1.38073	0.71602	0	0	Molecular Function:structural constituent of ribosome (GO:0003735),Cellular Component:intracellular (GO:0005622),Cellular Component:ribosome (GO:0005840),Biological Process:translation (GO:0006412)	large subunit ribosomal protein L22e	--	16.5332	21.2629	27.0481	16.1521	17.4758	PREDICTED: 60S ribosomal protein L22-2-like [Tarenaya hassleriana]	PREDICTED: Sesamum indicum 60S ribosomal protein L22-2-like (LOC105168926), mRNA	large subunit ribosomal protein L22e	60S ribosomal protein L22-2 OS=Arabidopsis thaliana GN=RPL22B PE=2 SV=1	Ribosomal L22e protein family	translation//ribosome biogenesis	structural constituent of ribosome	60S ribosomal protein L22
Tai6.7939	0.840334	0.783522	0.825934	0.786375	0.827026	Biological Process:SRP-dependent cotranslational protein targeting to membrane (GO:0006614),Molecular Function:7S RNA binding (GO:0008312),Cellular Component:signal recognition particle (GO:0048500)	signal recognition particle subunit SRP72	--	0.0370029	0.0352079	0	0.0223252	0	PREDICTED: signal recognition particle subunit SRP72-like [Nicotiana sylvestris]	PREDICTED: Solanum tuberosum signal recognition particle subunit SRP72-like (LOC102597446), misc_RNA	signal recognition particle subunit SRP72	Signal recognition particle subunit SRP72 OS=Canis familiaris GN=SRP72 PE=1 SV=3	Alkyl sulfatase dimerisation//Salmonella plasmid virulence protein SpvD//Tetratricopeptide repeat//Tetratricopeptide repeat//SRP72 RNA-binding domain//Tetratricopeptide repeat	SRP-dependent cotranslational protein targeting to membrane//pathogenesis	7S RNA binding//protein dimerization activity//protein binding	Signal recognition particle, subunit Srp72
Tai6.7935	0.333333	0	0.338576	1.54347	1.2796	--	E3 ubiquitin-protein ligase HERC4	Alpha-tubulin suppressor and related RCC1 domain-containing proteins	18.501	17.4997	20.3286	17.9533	14.163	unnamed protein product [Coffea canephora]	--	--	Probable E3 ubiquitin-protein ligase HERC4 OS=Homo sapiens GN=HERC4 PE=1 SV=1	--	--	--	FOG: RCC1 domain
Tai6.7934	0.863685	0.518211	0.322045	0	0	Molecular Function:aspartic-type endopeptidase activity (GO:0004190),Biological Process:proteolysis (GO:0006508)	--	--	105.763	96.7446	78.2638	95.8899	103.898	PREDICTED: aspartic proteinase Asp1 [Nicotiana tomentosiformis]	--	--	Aspartic proteinase Asp1 OS=Oryza sativa subsp. indica GN=ASP1 PE=2 SV=2	Single-strand DNA-binding protein//Eukaryotic aspartyl protease//Foamy virus envelope protein//CRT10	proteolysis//pathogenesis//regulation of transcription from RNA polymerase II promoter//protein folding	aspartic-type endopeptidase activity//protein binding	--
Tai6.7910	0.927248	0.764592	0.521162	0	0	--	solute carrier family 15 (oligopeptide transporter), member 1	--	10.6325	10.2695	10.6036	12.5586	12.5369	PREDICTED: transcription factor 25 [Nicotiana tomentosiformis]	PREDICTED: Nicotiana tomentosiformis transcription factor 25 (LOC104118314), mRNA	--	Transcription factor 25 homolog OS=Dictyostelium discoideum GN=tcf25 PE=3 SV=1	--	--	--	Uncharacterized conserved protein
Tai6.7901	1.11771	0.945269	0.574679	0	0	Cellular Component:mitochondrial inner membrane (GO:0005743),Cellular Component:mitochondrial inner membrane presequence translocase complex (GO:0005744),Biological Process:protein transport (GO:0015031)	mitochondrial import inner membrane translocase subunit TIM50	--	19.1574	20.8358	23.8974	20.1085	18.6359	PREDICTED: mitochondrial import inner membrane translocase subunit TIM50-like [Nicotiana sylvestris]	PREDICTED: Nicotiana tomentosiformis mitochondrial import inner membrane translocase subunit TIM50-like (LOC104096256), mRNA	mitochondrial import inner membrane translocase subunit TIM50	Mitochondrial import inner membrane translocase subunit TIM50 OS=Arabidopsis thaliana GN=TIM50 PE=1 SV=1	--	--	--	TFIIF-interacting CTD phosphatase, including NLI-interacting factor (involved in RNA polymerase II regulation)
Tai6.7895	0.978187	0.932104	0.883267	0.764107	1.0333	Molecular Function:protein binding (GO:0005515)	PERQ amino acid-rich with GYF domain-containing protein	--	0	0.0235786	0	0.0114447	0.0408839	PREDICTED: uncharacterized protein LOC104239698 isoform X3 [Nicotiana sylvestris]	PREDICTED: Nicotiana sylvestris uncharacterized LOC104239698 (LOC104239698), transcript variant X4, mRNA	--	--	GYF domain	--	protein binding	--
Tai6.7860	0.380471	0.0421998	0.0262626	0	0	--	small subunit ribosomal protein S4e	--	15.7392	13.7292	12.5333	13.5989	13.8355	PREDICTED: uncharacterized protein LOC102598413 [Solanum tuberosum]	PREDICTED: Solanum tuberosum uncharacterized LOC102598413 (LOC102598413), mRNA	--	--	PADR1 (NUC008) domain//Herpesvirus UL17 protein	DNA packaging	NAD+ ADP-ribosyltransferase activity	--
Tai6.7854	0.971158	1.52482	1.72041	1.16707	1.29459	Molecular Function:ribokinase activity (GO:0004747),Biological Process:D-ribose metabolic process (GO:0006014)	fructokinase	Sugar or nucleoside kinase, ribokinase family	0.108816	0.230144	0.0560996	0.16155	0.578724	putative fructokinase 2 [Petunia integrifolia subsp. inflata]	PREDICTED: Nicotiana tomentosiformis fructokinase-2 (LOC104099662), mRNA	fructokinase	Fructokinase-2 OS=Solanum lycopersicum GN=FRK2 PE=2 SV=2	--	--	--	--
Tai6.7832	0.333333	0	0.33852	0.976487	1.11757	--	mitochondrial inner membrane protease subunit 1	--	39.9868	37.4483	51.9468	50.3432	40.2804	PREDICTED: uncharacterized protein LOC104107251 [Nicotiana tomentosiformis]	--	--	--	--	--	--	--
Tai6.782	1.2856	1.12419	0.826861	0	0	--	myb proto-oncogene protein, plant	--	0.167861	0.0910345	0	0.0382898	0.170926	PREDICTED: myb-related protein 306-like [Nicotiana sylvestris]	PREDICTED: Beta vulgaris subsp. vulgaris myb-related protein 306 (LOC104894055), mRNA	myb proto-oncogene protein, plant	Myb-related protein 306 OS=Antirrhinum majus GN=MYB306 PE=2 SV=1	--	--	--	--
Tai6.7814	0.993554	0.887354	0.912919	1.45542	1.20667	--	branched-chain amino acid aminotransferase	--	51.7472	54.8674	49.4332	59.3691	55.0209	PREDICTED: putative nuclear matrix constituent protein 1-like protein [Sesamum indicum]	--	--	Protein CROWDED NUCLEI 1 OS=Arabidopsis thaliana GN=CRWN1 PE=1 SV=1	His Kinase A (phospho-acceptor) domain	phosphorylation//phosphorelay signal transduction system//signal transduction	phosphorelay sensor kinase activity	--
Tai6.7807	1.00117	0.789798	0.554676	0	0	Biological Process:telomere maintenance (GO:0000723),Molecular Function:DNA binding (GO:0003677),Molecular Function:damaged DNA binding (GO:0003684),Cellular Component:nucleus (GO:0005634),Biological Process:double-strand break repair via nonhomologous end joining (GO:0006303),Biological Process:DNA recombination (GO:0006310),Molecular Function:telomeric DNA binding (GO:0042162),Cellular Componen…	ATP-dependent DNA helicase 2 subunit 2	--	7.58488	10.7976	8.41613	9.93103	10.8174	hypothetical protein MIMGU_mgv1a022226mg [Erythranthe guttata]	Arabidopsis lyrata subsp. lyrata hypothetical protein, mRNA	ATP-dependent DNA helicase 2 subunit 2	ATP-dependent DNA helicase 2 subunit KU80 OS=Arabidopsis thaliana GN=KU80 PE=1 SV=1	--	--	--	--
Tai6.7782	0.333333	0	0.295652	0.903768	0.786087	--	--	--	0	0.0610197	0.0741767	0.0878195	0.0794384	PREDICTED: probable serine/threonine-protein kinase At1g54610-like isoform X1 [Solanum tuberosum]>gi|565362189|ref|XP_006347833.1| PREDICTED: probable serine/threonine-protein kinase At1g54610-like isoform X2 [Solanum tuberosum]	PREDICTED: Nicotiana sylvestris probable serine/threonine-protein kinase At1g54610 (LOC104244586), transcript variant X3, mRNA	cyclin-dependent kinase 12/13	Probable serine/threonine-protein kinase At1g09600 OS=Arabidopsis thaliana GN=At1g09600 PE=3 SV=1	--	--	--	--
Tai6.7771	0.903484	1.03516	0.617769	0	0	Molecular Function:zinc ion binding (GO:0008270)	zinc finger SWIM domain-containing protein 3	--	0.0377619	0.259179	0.0539981	0.149965	0.380301	PREDICTED: uncharacterized protein LOC105178831 [Sesamum indicum]>gi|747104834|ref|XP_011100669.1| PREDICTED: uncharacterized protein LOC105178831 [Sesamum indicum]	PREDICTED: Nicotiana tomentosiformis uncharacterized LOC104092868 (LOC104092868), transcript variant X2, mRNA	--	Exocyst complex component EXO70B1 OS=Arabidopsis thaliana GN=EXO70B1 PE=1 SV=1	Sigma-70 region 2//SWIM zinc finger	regulation of transcription, DNA-templated//DNA-templated transcription, initiation	transcription factor activity, sequence-specific DNA binding//zinc ion binding//DNA binding//sigma factor activity	--
Tai6.7719	1.00115	1.23127	1.15579	1.02652	0.721519	Molecular Function:signal recognition particle binding (GO:0005047),Biological Process:SRP-dependent cotranslational protein targeting to membrane (GO:0006614),Molecular Function:7S RNA binding (GO:0008312),Molecular Function:endoplasmic reticulum signal peptide binding (GO:0030942)	signal recognition particle subunit SRP68	--	0.314088	0.28207	0.157938	0.110198	0.381086	PREDICTED: signal recognition particle subunit SRP68-like [Solanum tuberosum]	PREDICTED: Prunus mume signal recognition particle subunit SRP68 (LOC103338147), mRNA	signal recognition particle subunit SRP68	Signal recognition particle subunit SRP68 OS=Canis familiaris GN=SRP68 PE=1 SV=1	TPR repeat//RNA-binding signal recognition particle 68//Tetratricopeptide repeat	SRP-dependent cotranslational protein targeting to membrane	signal recognition particle binding//7S RNA binding//endoplasmic reticulum signal peptide binding//protein binding	Signal recognition particle, subunit Srp68
Tai6.7702	0.88592	0.851149	0.921245	1.09605	1.03602	Molecular Function:ARF guanyl-nucleotide exchange factor activity (GO:0005086),Biological Process:regulation of ARF protein signal transduction (GO:0032012)	golgi-specific brefeldin A-resistance guanine nucleotide exchange factor 1	Guanine-nucleotide exchange factor, contains Sec7 domain	0.110977	0.00805254	0.0148085	0.0103518	0	PREDICTED: ARF guanine-nucleotide exchange factor GNOM-like isoform X2 [Nicotiana sylvestris]	PREDICTED: Nicotiana tomentosiformis ARF guanine-nucleotide exchange factor GNOM (LOC104116593), mRNA	golgi-specific brefeldin A-resistance guanine nucleotide exchange factor 1	ARF guanine-nucleotide exchange factor GNOM OS=Arabidopsis thaliana GN=GN PE=1 SV=1	Sec7 domain//KinB-signalling pathway activation in sporulation	regulation of ARF protein signal transduction//positive regulation of sporulation resulting in formation of a cellular spore//regulation of GTPase activity	ARF guanyl-nucleotide exchange factor activity	Pattern-formation protein/guanine nucleotide exchange factor
Tai6.7701	0.956762	0.927323	0.568844	0	0	Biological Process:sucrose metabolic process (GO:0005985),Molecular Function:sucrose synthase activity (GO:0016157)	sucrose synthase	Glycosyltransferase involved in cell wall bisynthesis	4.38159	12.9159	2.41794	3.44514	6.56901	PREDICTED: sucrose synthase 5-like [Nicotiana sylvestris]	PREDICTED: Nicotiana tomentosiformis sucrose synthase 6-like (LOC104108826), mRNA	sucrose synthase	Sucrose synthase 5 OS=Oryza sativa subsp. japonica GN=SUS5 PE=2 SV=1	Sucrose synthase//Pleurocidin family	starch metabolic process//defense response to bacterium//sucrose metabolic process	sucrose synthase activity	--
Tai6.7700	1.02721	1.32453	1.32443	1.69874	1.69821	--	1-aminocyclopropane-1-carboxylate deaminase	1-aminocyclopropane-1-carboxylate deaminase/D-cysteine desulfhydrase, PLP-dependent ACC family	62.327	88.4077	91.2392	116.155	109.244	PREDICTED: probable 1-aminocyclopropane-1-carboxylate deaminase-like isoform X1 [Solanum tuberosum]>gi|565397626|ref|XP_006364389.1| PREDICTED: probable 1-aminocyclopropane-1-carboxylate deaminase-like isoform X2 [Solanum tuberosum]	PREDICTED: Nicotiana tomentosiformis bifunctional D-cysteine desulfhydrase/1-aminocyclopropane-1-carboxylate deaminase, mitochondrial (LOC104094405), mRNA	--	Putative D-cysteine desulfhydrase 1, mitochondrial OS=Oryza sativa subsp. japonica GN=Os02g0773300 PE=2 SV=2	--	--	--	--
Tai6.77	1.0418	1.08289	1.08154	1.62008	1.49328	Molecular Function:GTPase activity (GO:0003924),Molecular Function:structural constituent of cytoskeleton (GO:0005200),Molecular Function:GTP binding (GO:0005525),Cellular Component:microtubule (GO:0005874),Biological Process:microtubule-based process (GO:0007017)	tubulin beta	--	9.48043	7.68233	8.18445	11.9062	8.66109	PREDICTED: tubulin beta-1 chain [Vitis vinifera]	PREDICTED: Nicotiana tomentosiformis tubulin beta-1 chain (LOC104102239), mRNA	tubulin beta	Tubulin beta-1 chain OS=Pisum sativum GN=TUBB1 PE=3 SV=1	Tubulin/FtsZ family, GTPase domain	--	GTPase activity	Beta tubulin
Tai6.7699	0.980514	0.831414	0.946552	1.06895	1.05931	Molecular Function:nucleic acid binding (GO:0003676)	eukaryotic translation initiation factor 2C	--	634.213	667.032	654.99	695.339	681.591	eukaryotic translation initiation factor 2c, putative [Ricinus communis]>gi|223534406|gb|EEF36112.1| eukaryotic translation initiation factor 2c, putative [Ricinus communis]	PREDICTED: Solanum tuberosum protein argonaute 1-like (LOC102595869), mRNA	eukaryotic translation initiation factor 2C	Protein argonaute 1B OS=Oryza sativa subsp. japonica GN=AGO1B PE=2 SV=3	Tachykinin family//Piwi domain	synaptic transmission//translational initiation//tachykinin receptor signaling pathway//regulation of translational initiation	nucleic acid binding//translation initiation factor activity	Translation initiation factor 2C (eIF-2C) and related proteins
Tai6.7698	0.985185	1.05714	1.18436	1.36905	1.17652	Molecular Function:protein binding (GO:0005515)	eukaryotic translation initiation factor 2C	--	344.246	482.556	407.761	468.136	426.208	PREDICTED: protein argonaute 1B-like [Solanum tuberosum]	PREDICTED: Solanum tuberosum protein argonaute 1B-like (LOC102582607), mRNA	eukaryotic translation initiation factor 2C	Protein argonaute 1B OS=Oryza sativa subsp. japonica GN=AGO1B PE=2 SV=3	PAZ domain	--	protein binding	Translation initiation factor 2C (eIF-2C) and related proteins
Tai6.7694	0.915709	0.648467	0.351293	0	0	--	omega-hydroxypalmitate O-feruloyl transferase	--	196.425	35.4235	7.15095	1.08729	5.83829	unnamed protein product [Coffea canephora]	PREDICTED: Solanum tuberosum feruloyl transferase (LOC102577559), mRNA	omega-hydroxypalmitate O-feruloyl transferase	Omega-hydroxypalmitate O-feruloyl transferase OS=Arabidopsis thaliana GN=HHT1 PE=1 SV=1	Transferase family	--	transferase activity, transferring acyl groups other than amino-acyl groups	--
Tai6.7692	0.845415	0.997522	0.635688	0	0	Molecular Function:protein kinase activity (GO:0004672),Molecular Function:ATP binding (GO:0005524),Biological Process:protein phosphorylation (GO:0006468)	dual specificity tyrosine-phosphorylation-regulated kinase 2/3/4	Serine/threonine protein kinase	1.47097	1.20878	1.02941	1.09049	0.982041	PREDICTED: uncharacterized protein LOC104112395 isoform X1 [Nicotiana tomentosiformis]	PREDICTED: Nicotiana tomentosiformis uncharacterized LOC104112395 (LOC104112395), transcript variant X1, mRNA	--	Probable serine/threonine-protein kinase dyrk2 OS=Dictyostelium discoideum GN=dyrk2 PE=3 SV=1	Protein tyrosine kinase//Domain of unknown function DUF108//Lipopolysaccharide kinase (Kdo/WaaP) family//Mre11 DNA-binding presumed domain//Protein kinase domain	double-strand break repair//NADP catabolic process//pyridine nucleotide biosynthetic process//oxidation-reduction process//protein phosphorylation	ATP binding//protein kinase activity//manganese ion binding//oxidoreductase activity//phosphotransferase activity, alcohol group as acceptor//endonuclease activity	Dual-specificity tyrosine-phosphorylation regulated kinase
Tai6.7688	1.19839	0.987732	0.617946	0	0	--	--	DNA mismatch repair ATPase MutL	0.0378243	0.178633	0.299366	0.03432	0.0608339	PREDICTED: uncharacterized protein LOC104210580 [Nicotiana sylvestris]	PREDICTED: Solanum lycopersicum uncharacterized LOC101245442 (LOC101245442), mRNA	--	MORC family CW-type zinc finger protein 4 OS=Homo sapiens GN=MORC4 PE=1 SV=2	SWI5-dependent HO expression protein 3//Lipoprotein leucine-zipper//Endothelin family//Vacuolar sorting 38 and autophagy-related subunit 14//Autophagy protein Apg6//Fusaric acid resistance protein family//GrpE	positive regulation of autophagy//autophagy//mRNA transport//endoplasmic reticulum inheritance//transport//regulation of vasoconstriction//protein folding	adenyl-nucleotide exchange factor activity//protein homodimerization activity//chaperone binding	--
Tai6.7686	0.333333	0	0.397567	1.61119	1.55085	--	exocyst complex component 4	--	0.107748	0.145471	0.0739962	0.0762266	0.0361606	PREDICTED: exocyst complex component SEC8 [Nicotiana tomentosiformis]>gi|697158646|ref|XP_009588084.1| PREDICTED: exocyst complex component SEC8 [Nicotiana tomentosiformis]	PREDICTED: Prunus mume exocyst complex component SEC8 (LOC103332331), mRNA	exocyst complex component 4	Exocyst complex component SEC8 OS=Arabidopsis thaliana GN=SEC8 PE=1 SV=1	RIM-binding protein of the cytomatrix active zone	--	--	--
Tai6.7651	0.856237	0.925382	0.741737	0.555697	0.590282	Molecular Function:RNA binding (GO:0003723),Molecular Function:translation initiation factor activity (GO:0003743),Cellular Component:cytoplasm (GO:0005737),Biological Process:translational initiation (GO:0006413)	translation initiation factor 4E	--	0.359133	0.262719	0	0.309447	0.213907	Cap-binding protein isoform 1 [Theobroma cacao]>gi|508718694|gb|EOY10591.1| Cap-binding protein isoform 1 [Theobroma cacao]	PREDICTED: Nicotiana tomentosiformis eukaryotic translation initiation factor NCBP-like (LOC104095138), mRNA	translation initiation factor 4E	Eukaryotic translation initiation factor NCBP OS=Triticum aestivum GN=NCBP PE=2 SV=1	Eukaryotic initiation factor 4E	translational initiation//regulation of translational initiation	RNA binding//translation initiation factor activity	Translation initiation factor 4F, cap-binding subunit (eIF-4E) and related cap-binding proteins
Tai6.7648	1.08284	0.75461	0.726904	0.995547	0.920483	Cellular Component:integral component of membrane (GO:0016021)	xyloglucan 6-xylosyltransferase	--	53.1913	94.9972	77.0016	58.9616	68.9923	PREDICTED: putative glycosyltransferase 7 [Nicotiana tomentosiformis]	PREDICTED: Erythranthe guttatus glycosyltransferase 6-like (LOC105973605), mRNA	--	Putative glycosyltransferase 7 OS=Arabidopsis thaliana GN=GT7 PE=2 SV=1	galactosyl transferase GMA12/MNN10 family//Glycosyl hydrolase family 52	sucrose metabolic process//nucleotide metabolic process//carbohydrate metabolic process//starch metabolic process	transferase activity, transferring glycosyl groups//xylan 1,4-beta-xylosidase activity	--
Tai6.7639	1.03605	1.42451	1.2079	0.842472	0.868581	Molecular Function:GTP binding (GO:0005525),Cellular Component:intracellular (GO:0005622),Biological Process:small GTPase mediated signal transduction (GO:0007264)	ADP-ribosylation factor-like protein 8	GTPase SAR1 family domain	21.5341	61.3173	37.7195	41.5133	39.7781	PREDICTED: ADP-ribosylation factor-like protein 8A [Nicotiana sylvestris]>gi|698494204|ref|XP_009793309.1| PREDICTED: ADP-ribosylation factor-like protein 8A [Nicotiana sylvestris]>gi|371501270|dbj|BAL44262.1| ADP-ribosylation factor-like 8a [Nicotiana tabacum]	PREDICTED: Nicotiana sylvestris ADP-ribosylation factor-like protein 8A (LOC104228806), mRNA	ADP-ribosylation factor-like protein 8	ADP-ribosylation factor-like protein 8A OS=Gallus gallus GN=ARL8A PE=2 SV=1	ADP-ribosylation factor family//Ras family//Ferrous iron transport protein B//Ras of Complex, Roc, domain of DAPkinase//50S ribosome-binding GTPase//G-protein alpha subunit//Gtr1/RagA G protein conserved region	ferrous iron transport//signal transduction//small GTPase mediated signal transduction//G-protein coupled receptor signaling pathway	G-protein beta/gamma-subunit complex binding//GTP binding//signal transducer activity//guanyl nucleotide binding//GTPase activity//ferrous iron transmembrane transporter activity	GTP-binding ADP-ribosylation factor-like protein
Tai6.7616	1.03863	0.531098	0.37415	0	0	Biological Process:ATP synthesis coupled proton transport (GO:0015986)	F-type H+-transporting ATPase subunit delta	FoF1-type ATP synthase, epsilon subunit	0.0850762	0.0860546	0.0586464	0	0.0949987	PREDICTED: uncharacterized protein LOC101265812 [Solanum lycopersicum]	--	--	--	--	--	--	--
Tai6.7608	0.741575	0.490865	0.391799	0	0	Molecular Function:tRNA binding (GO:0000049)	aminoacyl tRNA synthase complex-interacting multifunctional protein 1	Methionyl-tRNA synthetase	0	0.170297	0.269574	0.120726	0	PREDICTED: methionine--tRNA ligase, cytoplasmic-like [Solanum tuberosum]	PREDICTED: Sesamum indicum aminoacyl tRNA synthase complex-interacting multifunctional protein 1 (LOC105166975), mRNA	aminoacyl tRNA synthase complex-interacting multifunctional protein 1	Methionine--tRNA ligase, cytoplasmic OS=Arabidopsis thaliana GN=At4g13780 PE=2 SV=1	Putative tRNA binding domain	--	tRNA binding	tRNA-binding protein
Tai6.7602	0.895187	0.680543	1.37551	1.50665	1.3699	Biological Process:carbohydrate metabolic process (GO:0005975)	alpha-galactosidase	Alpha-galactosidase	7.45401	22.3799	22.8049	47.4911	27.856	PREDICTED: alpha-galactosidase-like [Nicotiana sylvestris]	PREDICTED: Eucalyptus grandis alpha-galactosidase (LOC104420997), transcript variant X2, mRNA	alpha-galactosidase	Alpha-galactosidase 3 OS=Arabidopsis thaliana GN=AGAL3 PE=1 SV=1	Melibiase//Alpha galactosidase A	galactose metabolic process//glycerolipid metabolic process//carbohydrate metabolic process//globoside metabolic process	hydrolase activity, hydrolyzing O-glycosyl compounds//alpha-galactosidase activity	Alpha-D-galactosidase (melibiase)
Tai6.7587	0.333333	0	0.329114	0.817592	1.11652	Molecular Function:electron carrier activity (GO:0009055),Molecular Function:protein disulfide oxidoreductase activity (GO:0015035),Biological Process:cell redox homeostasis (GO:0045454)	monothiol glutaredoxin	Glutaredoxin-related protein	34.9077	39.6553	49.9876	35.013	41.9718	PREDICTED: monothiol glutaredoxin-S7, chloroplastic [Nicotiana sylvestris]	PREDICTED: Nicotiana sylvestris monothiol glutaredoxin-S7, chloroplastic (LOC104228894), mRNA	monothiol glutaredoxin	Monothiol glutaredoxin-S7, chloroplastic OS=Oryza sativa subsp. japonica GN=GRXS7 PE=2 SV=1	Glutaredoxin	cell redox homeostasis//obsolete electron transport	protein disulfide oxidoreductase activity//electron carrier activity	Glutaredoxin-related protein
Tai6.7580	1.19901	0.636496	0.55373	0.141203	0.114013	Molecular Function:iron ion binding (GO:0005506),Molecular Function:heme binding (GO:0020037),Biological Process:oxidation-reduction process (GO:0055114)	--	Cytochrome P450	4.97212	1.78875	3.64104	2.97951	4.35468	PREDICTED: isoflavone 2'-hydroxylase-like [Nicotiana tomentosiformis]	PREDICTED: Vitis vinifera cytochrome P450 81E8-like (LOC100260801), mRNA	isoflavone 2'-hydroxylase	Cytochrome P450 81E8 OS=Medicago truncatula GN=CYP81E8 PE=2 SV=1	Cytochrome P450	oxidation-reduction process	oxidoreductase activity, acting on paired donors, with incorporation or reduction of molecular oxygen//iron ion binding//heme binding	--
Tai6.7545	0.947465	0.69845	0.789114	0.960462	0.805353	--	protein DEK	--	103.56	126.342	92.7577	95.4385	94.043	PREDICTED: axoneme-associated protein mst101(2)-like [Solanum tuberosum]	PREDICTED: Nicotiana sylvestris DNA ligase 1-like (LOC104223389), mRNA	protein DEK	--	SRP54-type protein, helical bundle domain//DSBA-like thioredoxin domain//Phosphatidylinositol-4-phosphate 5-Kinase	SRP-dependent cotranslational protein targeting to membrane//phosphatidylinositol metabolic process//obsolete electron transport	phosphatidylinositol phosphate kinase activity//protein disulfide oxidoreductase activity//GTP binding	--
Tai6.7531	0.94143	0.772036	0.583405	0	0	--	2-oxoglutarate dehydrogenase E2 component (dihydrolipoamide succinyltransferase)	Pyruvate/2-oxoglutarate dehydrogenase complex, dihydrolipoamide acyltransferase (E2) component	11.3041	22.9567	19.034	13.468	9.6011	PREDICTED: dihydrolipoyllysine-residue succinyltransferase component of 2-oxoglutarate dehydrogenase complex 2, mitochondrial-like [Nicotiana tomentosiformis]>gi|697103580|ref|XP_009605595.1| PREDICTED: dihydrolipoyllysine-residue succinyltransferase component of 2-oxoglutarate dehydrogenase complex 2, mitochondrial-like [Nicotiana tomentosiformis]	PREDICTED: Populus euphratica dihydrolipoyllysine-residue succinyltransferase component of 2-oxoglutarate dehydrogenase complex 1, mitochondrial-like (LOC105119062), transcript variant X3, mRNA	2-oxoglutarate dehydrogenase E2 component (dihydrolipoamide succinyltransferase)	Dihydrolipoyllysine-residue succinyltransferase component of 2-oxoglutarate dehydrogenase complex 1, mitochondrial OS=Arabidopsis thaliana GN=At5g55070 PE=2 SV=1	2-oxoacid dehydrogenases acyltransferase (catalytic domain)	metabolic process	transferase activity, transferring acyl groups	Dihydrolipoamide succinyltransferase (2-oxoglutarate dehydrogenase, E2 subunit)
Tai6.7524	0.747214	0.713273	0.565856	0	0	--	mlo protein	--	2.68177	0.799356	0.771601	0.419443	0.660259	hypothetical protein POPTR_0011s14080g [Populus trichocarpa]>gi|222860062|gb|EEE97609.1| hypothetical protein POPTR_0011s14080g [Populus trichocarpa]	PREDICTED: Nicotiana tomentosiformis uncharacterized LOC104101619 (LOC104101619), transcript variant X3, mRNA	--	--	--	--	--	--
Tai6.7513	1.07113	1.37262	1.16438	1.18961	1.21122	Molecular Function:structural constituent of ribosome (GO:0003735),Cellular Component:intracellular (GO:0005622),Cellular Component:ribosome (GO:0005840),Biological Process:translation (GO:0006412)	large subunit ribosomal protein L19e	Ribosomal protein L19E	1.09134	1.53236	1.47258	1.09814	0.909657	PREDICTED: 60S ribosomal protein L19-2-like [Cicer arietinum]	PREDICTED: Sesamum indicum 60S ribosomal protein L19-1 (LOC105163096), mRNA	large subunit ribosomal protein L19e	60S ribosomal protein L19-1 OS=Arabidopsis thaliana GN=RPL19A PE=2 SV=1	Ribosomal protein L19e	ribosome biogenesis//translation	structural constituent of ribosome	60s ribosomal protein L19
Tai6.7504	0.792293	0.445472	0.303468	0	0	Molecular Function:ADP binding (GO:0043531)	disease resistance protein RPS2	Predicted ATPase	1.54278	3.031	1.77501	1.98865	1.51937	PREDICTED: disease resistance protein At4g27190 [Vitis vinifera]>gi|731432586|ref|XP_010644326.1| PREDICTED: disease resistance protein At4g27190 [Vitis vinifera]	Ipomoea batatas clone IBRGA-2 NBS-LRR protein gene, partial cds	disease resistance protein RPS2	Disease resistance protein At4g27190 OS=Arabidopsis thaliana GN=At4g27190 PE=2 SV=1	Bicoid-interacting protein 3 (Bin3)//Leucine Rich Repeat//ADP-ribosylation factor family//NTPase//NB-ARC domain//Leucine rich repeat//Archaeal ATPase	--	ATP binding//GTP binding//protein binding//methyltransferase activity//nucleotide phosphatase activity, acting on free nucleotides//ADP binding	--
Tai6.7456	1.07383	0.915082	0.83591	0.892066	0.944034	Molecular Function:ATP binding (GO:0005524),Cellular Component:cytoplasm (GO:0005737),Biological Process:metabolic process (GO:0008152),Molecular Function:kinase activity (GO:0016301)	glucuronokinase	Mevalonate kinase	7.94369	6.46649	8.199	12.8315	10.7238	PREDICTED: glucuronokinase 1-like [Nicotiana tomentosiformis]	PREDICTED: Cucumis melo glucuronokinase 1 (LOC103498117), mRNA	glucuronokinase	Glucuronokinase 1 OS=Arabidopsis thaliana GN=GLCAK1 PE=1 SV=1	GHMP kinases N terminal domain	--	ATP binding	--
Tai6.7453	0.333333	0	0.291605	0.614074	0.736296	--	--	--	6.25975	2.24376	1.51554	5.47392	8.88538	unnamed protein product [Arabidopsis thaliana]	--	--	Chitin biosynthesis protein CHS5 OS=Saccharomyces cerevisiae (strain ATCC 204508 / S288c) GN=CHS5 PE=1 SV=1	--	--	--	--
Tai6.7435	0.841549	0.64108	0.39507	0	0	--	uncharacterized protein	--	29.132	23.2653	17.081	17.7102	17.6105	PREDICTED: oxysterol-binding protein-related protein 1C isoform X1 [Nicotiana tomentosiformis]	PREDICTED: Nicotiana tomentosiformis oxysterol-binding protein-related protein 1C (LOC104085553), transcript variant X1, mRNA	--	Oxysterol-binding protein-related protein 1C OS=Arabidopsis thaliana GN=ORP1C PE=2 SV=1	--	--	--	Oxysterol-binding protein
Tai6.7432	0.945343	1.30754	0.82679	0	0	Molecular Function:protein kinase activity (GO:0004672),Molecular Function:calcium ion binding (GO:0005509),Molecular Function:ATP binding (GO:0005524),Biological Process:protein phosphorylation (GO:0006468)	calcium-dependent protein kinase	Serine/threonine protein kinase	47.1931	25.2436	24.9088	34.4245	32.6848	PREDICTED: CDPK-related kinase 3 [Nicotiana tomentosiformis]	PREDICTED: Nicotiana tomentosiformis CDPK-related kinase 3 (LOC104086185), mRNA	--	CDPK-related kinase 3 OS=Arabidopsis thaliana GN=CRK3 PE=1 SV=1	Protein kinase domain//Lipopolysaccharide kinase (Kdo/WaaP) family//Protein tyrosine kinase	protein phosphorylation	phosphotransferase activity, alcohol group as acceptor//ATP binding//protein kinase activity	--
Tai6.7407	1.08019	0.939308	0.496226	0	0	Biological Process:phosphatidylinositol phosphorylation (GO:0046854)	3'(2'), 5'-bisphosphate nucleotidase	3'-Phosphoadenosine 5'-phosphosulfate (PAPS) 3'-phosphatase	1.04672	4.14498	2.49094	1.72769	3.331	PREDICTED: putative PAP-specific phosphatase, mitochondrial [Solanum lycopersicum]	PREDICTED: Nicotiana sylvestris putative PAP-specific phosphatase, mitochondrial (LOC104216126), transcript variant X3, mRNA	3'(2'), 5'-bisphosphate nucleotidase	Putative PAP-specific phosphatase, mitochondrial OS=Arabidopsis thaliana GN=At4g05090 PE=2 SV=1	Inositol monophosphatase family	phosphatidylinositol phosphorylation	--	--
Tai6.7383	0.960573	1.40382	1.32846	1.5177	1.86899	Molecular Function:oxidoreductase activity (GO:0016491),Biological Process:cell redox homeostasis (GO:0045454)	peroxiredoxin (alkyl hydroperoxide reductase subunit C)	Peroxiredoxin	369.452	469.647	448.107	407.534	416.945	thioredoxin peroxidase [Capsicum annuum]	--	--	Peroxiredoxin-2B OS=Arabidopsis thaliana GN=PRXIIB PE=1 SV=1	AhpC/TSA family//Redoxin	oxidation-reduction process	oxidoreductase activity//antioxidant activity	Alkyl hydroperoxide reductase/peroxiredoxin
Tai6.7354	0.971997	1.03543	1.05639	1.08818	1.03492	Biological Process:carbohydrate metabolic process (GO:0005975)	UDP-glucose 4-epimerase	UDP-glucose 4-epimerase	75.3882	48.4406	94.3036	76.4265	67.3682	PREDICTED: bifunctional UDP-glucose 4-epimerase and UDP-xylose 4-epimerase 1 [Nicotiana sylvestris]>gi|698530083|ref|XP_009761860.1| PREDICTED: bifunctional UDP-glucose 4-epimerase and UDP-xylose 4-epimerase 1 [Nicotiana sylvestris]	PREDICTED: Fragaria vesca subsp. vesca bifunctional UDP-glucose 4-epimerase and UDP-xylose 4-epimerase 1 (LOC101290858), mRNA	UDP-glucose 4-epimerase	Bifunctional UDP-glucose 4-epimerase and UDP-xylose 4-epimerase 1 OS=Pisum sativum GN=UGE1 PE=1 SV=2	3-hydroxyacyl-CoA dehydrogenase, NAD binding domain//NAD dependent epimerase/dehydratase family//short chain dehydrogenase//UDP-glucose/GDP-mannose dehydrogenase family, NAD binding domain//Saccharopine dehydrogenase NADP binding domain//3-beta hydroxysteroid dehydrogenase/isomerase family	estrogen metabolic process//fatty acid metabolic process//tryptophan metabolic process//C21-steroid hormone metabolic process//benzoate metabolic process//isoleucine catabolic process//valine catabolic process//metabolic process//androgen metabolic process//lysine catabolic process//fatty acid biosynthetic process//steroid biosynthetic process//oxidation-reduction process//leucine catabolic proce…	catalytic activity//coenzyme binding//NAD binding//3-beta-hydroxy-delta5-steroid dehydrogenase activity//oxidoreductase activity//3-hydroxyacyl-CoA dehydrogenase activity//oxidoreductase activity, acting on the CH-OH group of donors, NAD or NADP as acceptor	UDP-glucose 4-epimerase/UDP-sulfoquinovose synthase
Tai6.7351	1.06272	1.07658	0.632363	0	0	Biological Process:Golgi organization (GO:0007030),Biological Process:protein transport (GO:0015031),Cellular Component:membrane (GO:0016020)	--	--	21.1293	25.2759	27.7497	27.7021	31.5932	unnamed protein product [Coffea canephora]	--	--	Conserved oligomeric Golgi complex subunit 2 OS=Homo sapiens GN=COG2 PE=1 SV=1	Dor1-like family//Baculovirus polyhedron envelope protein, PEP, C terminus//Laminin Domain II//Apolipoprotein A1/A4/E domain	lipid transport//lipoprotein metabolic process//cell adhesion	lipid binding//structural molecule activity	Low density lipoprotein receptor
Tai6.7334	0.962382	1.10972	1.01025	0.847259	0.869247	Molecular Function:phosphatidylinositol binding (GO:0035091)	sorting nexin-1/2	--	0.0149083	0	0	0	0.014898	PREDICTED: sorting nexin 2B-like isoform X1 [Nicotiana sylvestris]	PREDICTED: Nicotiana tomentosiformis sorting nexin 2B-like (LOC104110913), mRNA	--	Sorting nexin 2B OS=Arabidopsis thaliana GN=SNX2B PE=1 SV=1	PX domain//Arfaptin-like domain//Centromere protein H (CENP-H)	kinetochore assembly	protein domain specific binding//phosphatidylinositol binding	Membrane coat complex Retromer, subunit VPS5/SNX1, Sorting nexins, and related PX domain-containing proteins
Tai6.7316	0.916028	1.01373	0.62484	0	0	Molecular Function:copper ion binding (GO:0005507),Molecular Function:oxidoreductase activity (GO:0016491),Biological Process:oxidation-reduction process (GO:0055114)	laccase	Multicopper oxidase with three cupredoxin domains (includes cell division protein FtsP and spore coat protein CotA)	3.99329	10.8677	26.5595	9.56744	11.2111	unnamed protein product [Coffea canephora]	PREDICTED: Sesamum indicum multicopper oxidase LPR1 (LOC105160154), mRNA	--	Multicopper oxidase LPR2 OS=Arabidopsis thaliana GN=LPR2 PE=2 SV=1	Multicopper oxidase//Multicopper oxidase//Multicopper oxidase	oxidation-reduction process	copper ion binding//oxidoreductase activity	--
Tai6.7310	0.930934	0.976654	0.68677	0	0	Biological Process:carbohydrate metabolic process (GO:0005975)	alpha-galactosidase	Alpha-galactosidase	22.6237	52.5074	51.2587	112.556	67.2487	unnamed protein product [Coffea canephora]	PREDICTED: Eucalyptus grandis alpha-galactosidase (LOC104420997), transcript variant X2, mRNA	alpha-galactosidase	Alpha-galactosidase 3 OS=Arabidopsis thaliana GN=AGAL3 PE=1 SV=1	Melibiase//Alpha galactosidase A	galactose metabolic process//glycerolipid metabolic process//carbohydrate metabolic process//globoside metabolic process	hydrolase activity, hydrolyzing O-glycosyl compounds//alpha-galactosidase activity	Alpha-D-galactosidase (melibiase)
Tai6.7296	0.915936	0.617934	0.689319	0.871927	0.80789	Molecular Function:ATP binding (GO:0005524),Cellular Component:cytoplasm (GO:0005737),Biological Process:metabolic process (GO:0008152),Molecular Function:kinase activity (GO:0016301)	L-arabinokinase	Galactokinase	36.6069	16.5768	18.4772	16.2465	9.73729	PREDICTED: L-arabinokinase-like [Nicotiana sylvestris]	Morus notabilis hypothetical protein partial mRNA	L-arabinokinase	L-arabinokinase OS=Arabidopsis thaliana GN=ARA1 PE=1 SV=1	GHMP kinases N terminal domain	--	ATP binding	--
Tai6.7295	1.15073	0.622056	0.655145	0.51996	0.532735	--	--	Uncharacterized conserved protein YtfP, gamma-glutamylcyclotransferase (GGCT)/AIG2-like family	13.4831	8.32354	7.57523	7.57637	6.79342	PREDICTED: AIG2-like protein [Nicotiana sylvestris]>gi|698524996|ref|XP_009759311.1| PREDICTED: AIG2-like protein [Nicotiana sylvestris]	--	--	AIG2-like protein OS=Arabidopsis thaliana GN=At5g39720 PE=1 SV=1	--	--	--	--
Tai6.7287	1.12289	0.831388	0.954956	1.10425	1.03626	--	myosin V	--	55.2711	56.1724	52.8357	65.8654	66.3335	PREDICTED: serine/threonine-protein kinase EDR1 [Nicotiana sylvestris]	Solanum lycopersicum TCTR2 protein (TCTR2), mRNA	--	Serine/threonine-protein kinase EDR1 OS=Arabidopsis thaliana GN=EDR1 PE=1 SV=1	--	--	--	--
Tai6.7283	0.959165	0.870236	0.91628	1.17095	1.02534	Molecular Function:protein binding (GO:0005515)	WD repeat-containing protein 48	WD40 repeat	0.135644	0	0.032525	0	0	PREDICTED: WD repeat-containing protein 48-like [Nicotiana tomentosiformis]>gi|697111638|ref|XP_009609698.1| PREDICTED: WD repeat-containing protein 48-like [Nicotiana tomentosiformis]	PREDICTED: Nicotiana tomentosiformis WD repeat-containing protein 48-like (LOC104103489), transcript variant X2, mRNA	WD repeat-containing protein 48	WD repeat-containing protein 48 OS=Xenopus tropicalis GN=wdr48 PE=2 SV=1	WD domain, G-beta repeat	--	protein binding	Conserved WD40 repeat-containing protein
Tai6.7277	0.980471	0.681113	0.743061	0.601806	0.701117	--	exportin-5	--	18.7853	20.9097	23.353	27.6042	29.4009	PREDICTED: protein HASTY 1 isoform X2 [Nicotiana sylvestris]	PREDICTED: Nicotiana tomentosiformis protein HASTY 1 (LOC104099349), transcript variant X2, mRNA	exportin-5	Protein HASTY 1 OS=Arabidopsis thaliana GN=HST1 PE=1 SV=1	--	--	--	--
Tai6.7273	1.12659	0.849273	0.500464	0	0	--	E3 SUMO-protein ligase PIAS1	--	3.66463	2.05534	2.42602	2.05304	2.28486	PREDICTED: trafficking protein particle complex subunit 6B [Solanum lycopersicum]>gi|565375053|ref|XP_006354055.1| PREDICTED: trafficking protein particle complex subunit 6B-like [Solanum tuberosum]	PREDICTED: Solanum lycopersicum trafficking protein particle complex subunit 6B (LOC101264318), mRNA	--	Trafficking protein particle complex subunit 6B OS=Homo sapiens GN=TRAPPC6B PE=1 SV=1	Protein of unknown function (DUF_B2219)	oxidation-reduction process//tyrosine metabolic process//obsolete electron transport	catechol oxidase activity	Transport protein particle (TRAPP) complex subunit
Tai6.7272	1.06508	0.420251	0.279285	0	0	Molecular Function:iron ion binding (GO:0005506),Molecular Function:heme binding (GO:0020037),Biological Process:oxidation-reduction process (GO:0055114)	26-hydroxylase	Cytochrome P450	117.552	6.3939	31.5214	45.078	44.7265	unnamed protein product [Coffea canephora]	--	--	Cytochrome P450 CYP736A12 OS=Panax ginseng PE=2 SV=1	Cytochrome P450	oxidation-reduction process	iron ion binding//heme binding//oxidoreductase activity, acting on paired donors, with incorporation or reduction of molecular oxygen	--
Tai6.7261	0.978296	1.30794	1.35469	1.32888	1.21385	Cellular Component:nuclear pore (GO:0005643)	nuclear pore complex protein Nup54	--	23.2724	25.3269	25.7172	24.4341	22.4552	PREDICTED: nuclear pore complex protein Nup54-like [Solanum tuberosum]	PREDICTED: Nicotiana sylvestris nuclear pore complex protein Nup54 (LOC104220264), mRNA	nuclear pore complex protein Nup54	Nuclear pore complex protein NUP54 OS=Arabidopsis thaliana GN=NUP54 PE=1 SV=1	--	--	--	--
Tai6.7260	0.916469	1.38282	0.867775	0	0	Molecular Function:nucleic acid binding (GO:0003676),Molecular Function:helicase activity (GO:0004386),Molecular Function:ATP binding (GO:0005524)	pre-mRNA-splicing factor ATP-dependent RNA helicase DHX38/PRP16	HrpA-like RNA helicase	0.0362951	0.0385519	0.0186968	0.0164663	0.0199059	PREDICTED: pre-mRNA-splicing factor ATP-dependent RNA helicase PRP16 [Nicotiana tomentosiformis]>gi|697189092|ref|XP_009603593.1| PREDICTED: pre-mRNA-splicing factor ATP-dependent RNA helicase PRP16 [Nicotiana tomentosiformis]	PREDICTED: Nicotiana tomentosiformis pre-mRNA-splicing factor ATP-dependent RNA helicase PRP16 (LOC104098543), transcript variant X2, mRNA	pre-mRNA-splicing factor ATP-dependent RNA helicase DHX38/PRP16	Pre-mRNA-splicing factor ATP-dependent RNA helicase PRP16 OS=Homo sapiens GN=DHX38 PE=1 SV=2	DEAD/DEAH box helicase//Aurein-like antibiotic peptide//Flavivirus DEAD domain//Helicase associated domain (HA2)	defense response//viral genome replication	ATP binding//helicase activity//ATP-dependent helicase activity//nucleic acid binding	DEAH-box RNA helicase
Tai6.7255	0.911903	0.812483	0.754117	0.78249	0.789831	Molecular Function:protein binding (GO:0005515),Biological Process:signal transduction (GO:0007165),Molecular Function:ADP binding (GO:0043531)	heat shock 70kDa protein 1/8	Predicted ATPase	17.1113	17.4494	15.4227	26.5154	13.5011	unnamed protein product [Coffea canephora]	Ipomoea trifida DNA, self-incompatibility (S-) locus region, haplptype:S10	--	TMV resistance protein N OS=Nicotiana glutinosa GN=N PE=1 SV=1	TIR domain//TIR domain//NB-ARC domain//Archaeal ATPase//Type III restriction enzyme, res subunit	signal transduction	hydrolase activity//ADP binding//DNA binding//ATP binding//protein binding	--
Tai6.7250	0.983089	1.21458	0.808719	0	0	Molecular Function:ADP binding (GO:0043531)	leucine-rich repeat protein SHOC2	Leucine-rich repeat (LRR) protein	1.40379	1.71577	1.07212	1.1865	1.00864	PREDICTED: TMV resistance protein N-like [Nicotiana tomentosiformis]>gi|697174614|ref|XP_009596238.1| PREDICTED: TMV resistance protein N-like [Nicotiana tomentosiformis]>gi|697174616|ref|XP_009596239.1| PREDICTED: TMV resistance protein N-like [Nicotiana tomentosiformis]	Ipomoea batata isolate SP-06_D08 resistance gene analog genomic sequence	--	TMV resistance protein N OS=Nicotiana glutinosa GN=N PE=1 SV=1	Leucine rich repeat//Rpp14/Pop5 family//Archaeal ATPase//TIR domain//TIR domain//NB-ARC domain//Ulp1 protease family, C-terminal catalytic domain	proteolysis//signal transduction//regulation of RNA metabolic process//tRNA processing	ATP binding//protein binding//ribonuclease activity//ADP binding//cysteine-type peptidase activity	--
Tai6.7233	1.00605	0.91595	1.04406	1.17349	1.19337	--	--	--	0	0	0.0284483	0	0.0107313	PREDICTED: paladin [Solanum lycopersicum]	PREDICTED: Solanum tuberosum paladin-like (LOC102603371), transcript variant X2, mRNA	--	Paladin OS=Homo sapiens GN=PALD1 PE=1 SV=3	Protein-tyrosine phosphatase//Dual specificity phosphatase, catalytic domain//Sodium/calcium exchanger protein	tyrosine metabolic process//transmembrane transport//protein dephosphorylation	protein tyrosine phosphatase activity//protein tyrosine/serine/threonine phosphatase activity	--
Tai6.7221	1.06641	1.04568	0.736088	0.437976	0.422379	--	guanine deaminase	--	162.582	138.909	185.425	175.081	160.748	PREDICTED: ER membrane protein complex subunit 8/9 homolog [Pyrus x bretschneideri]	PREDICTED: Populus euphratica ER membrane protein complex subunit 8/9 homolog (LOC105135596), mRNA	--	ER membrane protein complex subunit 8/9 homolog OS=Arabidopsis thaliana GN=EMB2731 PE=2 SV=1	--	--	--	Uncharacterized conserved protein encoded by sequence overlapping the COX4 gene
Tai6.7205	1.10607	0.721481	0.543111	0	0	Molecular Function:motor activity (GO:0003774),Cellular Component:myosin complex (GO:0016459)	myosin I	--	29.6379	23.6494	24.1322	26.7122	26.2611	PREDICTED: myosin IB heavy chain [Nicotiana sylvestris]	--	--	Myosin IB heavy chain OS=Dictyostelium discoideum GN=myoB PE=1 SV=2	Unconventional myosin tail, actin- and lipid-binding//AIG1 family	--	GTP binding//motor activity	--
Tai6.7198	1.11686	0.597683	0.344659	0	0	Molecular Function:nucleic acid binding (GO:0003676),Molecular Function:ATP binding (GO:0005524)	ATP-dependent RNA helicase DDX24/MAK5	Superfamily II DNA and RNA helicase	0.671284	0.684974	0.863408	0.910152	0.649953	PREDICTED: DEAD-box ATP-dependent RNA helicase 13 isoform X1 [Nicotiana sylvestris]	PREDICTED: Nicotiana sylvestris DEAD-box ATP-dependent RNA helicase 13 (LOC104232883), transcript variant X1, mRNA	ATP-dependent RNA helicase DDX24/MAK5	DEAD-box ATP-dependent RNA helicase 13 OS=Arabidopsis thaliana GN=RH13 PE=2 SV=3	Type III restriction enzyme, res subunit//DEAD/DEAH box helicase	--	ATP binding//DNA binding//hydrolase activity//nucleic acid binding	RNA helicase
Tai6.7192	1.03353	1.10135	1.23505	0.607126	0.647914	--	--	--	36.2862	36.2438	34.3658	33.0929	33.1773	PREDICTED: uncharacterized protein LOC104223102 [Nicotiana sylvestris]	--	--	--	--	--	--	--
Tai6.7189	1.0757	0.646481	0.760436	1.28987	1.1234	Biological Process:carbohydrate metabolic process (GO:0005975),Molecular Function:quinone binding (GO:0048038)	TATA box-binding protein-associated factor RNA polymerase I subunit A	Glucose/arabinose dehydrogenase, beta-propeller fold	21.5427	11.2444	11.9703	19.7052	15.4442	PREDICTED: HIPL1 protein-like [Nicotiana tomentosiformis]	--	--	HIPL1 protein OS=Arabidopsis thaliana GN=HIPL1 PE=1 SV=2	Glucose / Sorbosone dehydrogenase	carbohydrate metabolic process	quinone binding//oxidoreductase activity, acting on the CH-OH group of donors, quinone or similar compound as acceptor	--
Tai6.7183	1.06033	0.997978	0.638018	0	0	Molecular Function:structural constituent of ribosome (GO:0003735),Cellular Component:intracellular (GO:0005622),Cellular Component:ribosome (GO:0005840),Biological Process:translation (GO:0006412)	large subunit ribosomal protein L19e	Ribosomal protein L19E	251.51	236.939	292.55	195.483	200.898	PREDICTED: ethylene-responsive transcription factor ERF071 [Nicotiana tomentosiformis]	Morus notabilis Ethylene-responsive transcription factor partial mRNA	EREBP-like factor	Ethylene-responsive transcription factor RAP2-3 OS=Arabidopsis thaliana GN=RAP2-3 PE=1 SV=2	AP2 domain	regulation of transcription, DNA-templated	transcription factor activity, sequence-specific DNA binding	--
Tai6.7168	0.555556	0.479642	0.485816	1.35784	1.24918	Biological Process:mRNA processing (GO:0006397)	U6 snRNA-associated Sm-like protein LSm2	--	19.9505	19.7713	21.154	14.2248	16.6109	hypothetical protein PHAVU_001G148500g [Phaseolus vulgaris]>gi|561035858|gb|ESW34388.1| hypothetical protein PHAVU_001G148500g [Phaseolus vulgaris]	PREDICTED: Erythranthe guttatus sm-like protein LSM2 (LOC105953532), mRNA	U6 snRNA-associated Sm-like protein LSm2	Sm-like protein LSM2 OS=Arabidopsis thaliana GN=LSM2 PE=1 SV=1	Diacylglycerol kinase accessory domain	phospholipid catabolic process//protein kinase C-activating G-protein coupled receptor signaling pathway//glycerolipid metabolic process	diacylglycerol kinase activity	Predicted snRNP core protein
Tai6.7161	1.02702	0.988607	0.860112	0.893276	0.79113	Molecular Function:acyl-CoA dehydrogenase activity (GO:0003995),Biological Process:metabolic process (GO:0008152),Molecular Function:flavin adenine dinucleotide binding (GO:0050660),Biological Process:oxidation-reduction process (GO:0055114)	acyl-CoA dehydrogenase	Acyl-CoA dehydrogenase related to the alkylation response protein AidB	182.365	114.389	110.343	136.319	137.137	PREDICTED: acyl-CoA dehydrogenase family member 10 [Nicotiana sylvestris]	PREDICTED: Solanum tuberosum acyl-CoA dehydrogenase family member 10-like (LOC102592751), mRNA	acyl-CoA dehydrogenase	Probable acyl-CoA dehydrogenase IBR3 OS=Arabidopsis thaliana GN=IBR3 PE=1 SV=1	Acyl-CoA dehydrogenase, N-terminal domain//Lipopolysaccharide kinase (Kdo/WaaP) family//Acyl-CoA dehydrogenase, C-terminal domain//Acyl-CoA dehydrogenase, middle domain	oxidation-reduction process//obsolete electron transport//metabolic process	oxidoreductase activity, acting on the CH-CH group of donors//phosphotransferase activity, alcohol group as acceptor//flavin adenine dinucleotide binding//acyl-CoA dehydrogenase activity//ATP binding	Medium-chain acyl-CoA dehydrogenase
Tai6.7140	1.3494	1.20803	1.04052	1.03271	1.36332	Molecular Function:polygalacturonase activity (GO:0004650),Biological Process:carbohydrate metabolic process (GO:0005975)	ribonuclease Z	Polygalacturonase	90.8038	476.343	42.3709	40.2308	69.5402	PREDICTED: probable polygalacturonase isoform X2 [Nicotiana sylvestris]	PREDICTED: Solanum tuberosum probable polygalacturonase-like (LOC102583279), transcript variant X3, mRNA	--	Probable polygalacturonase OS=Vitis vinifera GN=GSVIVT00026920001 PE=1 SV=1	Glycosyl hydrolases family 28	sucrose metabolic process//starch metabolic process//carbohydrate metabolic process	polygalacturonase activity	--
Tai6.7132	1.07315	1.25021	1.00208	0	0	--	small nuclear ribonucleoprotein B and B'	Uncharacterized surface anchored protein	104.66	104.521	149.23	167.484	166.002	PREDICTED: small nuclear ribonucleoprotein-associated proteins B and B'-like [Solanum lycopersicum]	Cucumis melo genomic chromosome, chr_8	small nuclear ribonucleoprotein B and B'	Small nuclear ribonucleoprotein-associated protein B OS=Drosophila melanogaster GN=SmB PE=1 SV=1	--	--	--	U1 snRNP component
Tai6.7130	0.988309	0.776162	0.516396	0	0	Molecular Function:protein binding (GO:0005515)	pleiotropic regulator 1	WD40 repeat	94.7263	100.026	117.133	119.521	108.265	PREDICTED: protein pleiotropic regulatory locus 1 [Vitis vinifera]>gi|296083362|emb|CBI22998.3| unnamed protein product [Vitis vinifera]	PREDICTED: Gossypium raimondii protein pleiotropic regulatory locus 1-like (LOC105800738), transcript variant X3, mRNA	pleiotropic regulator 1	Protein pleiotropic regulatory locus 1 OS=Arabidopsis thaliana GN=PRL1 PE=1 SV=1	WD domain, G-beta repeat	--	protein binding	Pleiotropic regulator 1
Tai6.7123	0.333333	0	0.339662	1.12834	1.0116	--	myosin heavy chain	--	3.76649	7.33795	10.3362	13.5179	14.5715	PREDICTED: filament-like plant protein 7 [Solanum lycopersicum]>gi|723669271|ref|XP_010315974.1| PREDICTED: filament-like plant protein 7 [Solanum lycopersicum]	PREDICTED: Nicotiana tomentosiformis filament-like plant protein 7 (LOC104106575), transcript variant X3, mRNA	--	Filament-like plant protein 7 OS=Arabidopsis thaliana GN=FPP7 PE=3 SV=2	Homeobox associated leucine zipper//Growth-arrest specific micro-tubule binding//Autophagy protein Apg6//TSC-22/dip/bun family//Centrosomin N-terminal motif 1//Myosin-like coiled-coil protein//Baculovirus polyhedron envelope protein, PEP, C terminus//Vacuolar sorting 38 and autophagy-related subunit 14	positive regulation of autophagy//autophagy//cell motility//regulation of transcription, DNA-templated	transcription factor activity, sequence-specific DNA binding//syntaxin binding//structural molecule activity//sequence-specific DNA binding	--
Tai6.7118	0.991574	0.655019	0.336059	0	0	Molecular Function:methyltransferase activity (GO:0008168)	DNA (cytosine-5)-methyltransferase 1	Site-specific DNA-cytosine methylase	11.5001	13.1495	9.05288	14.6359	19.2979	PREDICTED: DNA (cytosine-5)-methyltransferase CMT3 [Solanum lycopersicum]	PREDICTED: Nicotiana sylvestris DNA (cytosine-5)-methyltransferase CMT3-like (LOC104230223), transcript variant X4, mRNA	DNA (cytosine-5)-methyltransferase 1	DNA (cytosine-5)-methyltransferase CMT3 OS=Arabidopsis thaliana GN=CMT3 PE=1 SV=2	--	--	--	--
Tai6.7106	0.970154	0.989318	0.890911	1.00067	1.00401	Molecular Function:GTPase activity (GO:0003924),Molecular Function:GTP binding (GO:0005525)	dynamin GTPase	--	112.87	136.412	152.651	130.687	132.878	phragmoplastin [Camellia sinensis]	PREDICTED: Nicotiana sylvestris dynamin-related protein 5A (LOC104227269), mRNA	--	Dynamin-related protein 1A OS=Arabidopsis thaliana GN=DRP1A PE=1 SV=3	Dynamin central region//Non-histone chromosomal protein MC1//Dynamin GTPase effector domain	DNA protection	GTPase activity//GTP binding	Vacuolar sorting protein VPS1, dynamin, and related proteins
Tai6.7101	0.929315	0.587267	0.571635	0.451949	0.406754	Biological Process:biosynthetic process (GO:0009058),Molecular Function:pyridoxal phosphate binding (GO:0030170)	serine palmitoyltransferase	Acyl carrier protein	0.523452	1.40295	0.339371	0.350058	1.14527	PREDICTED: long chain base biosynthesis protein 2a-like [Solanum lycopersicum]	PREDICTED: Nicotiana sylvestris long chain base biosynthesis protein 2a (LOC104213613), mRNA	serine palmitoyltransferase	Long chain base biosynthesis protein 2b OS=Arabidopsis thaliana GN=LCB2b PE=1 SV=1	Cys/Met metabolism PLP-dependent enzyme//Aminotransferase class I and II//Delta lysin family//Beta-eliminating lyase//Orn/Lys/Arg decarboxylase, major domain	cellular amino acid metabolic process//hemolysis by symbiont of host erythrocytes//biosynthetic process	catalytic activity//pyridoxal phosphate binding//lyase activity	Serine palmitoyltransferase
Tai6.7100	1.25933	0.2	0.128175	0	0	--	--	--	3.70719	5.76544	6.55826	10.389	4.70094	PREDICTED: uncharacterized protein LOC104093515 isoform X1 [Nicotiana tomentosiformis]	PREDICTED: Nicotiana tomentosiformis uncharacterized LOC104093515 (LOC104093515), transcript variant X1, mRNA	--	--	--	--	--	--
Tai6.7093	0.851269	0.918635	0.767416	0.393544	0.519405	Molecular Function:structural constituent of ribosome (GO:0003735),Cellular Component:intracellular (GO:0005622),Cellular Component:ribosome (GO:0005840),Biological Process:translation (GO:0006412)	large subunit ribosomal protein L18e	--	186.704	242.496	338.847	246.33	201.001	PREDICTED: 60S ribosomal protein L18-2-like [Nicotiana tomentosiformis]	PREDICTED: Nicotiana tomentosiformis 60S ribosomal protein L18-2-like (LOC104116343), mRNA	large subunit ribosomal protein L18e	60S ribosomal protein L18-2 OS=Arabidopsis thaliana GN=RPL18B PE=1 SV=2	--	--	--	60s ribosomal protein L18
Tai6.7081	0.97451	1.0049	1.00401	1.17172	1.01227	Molecular Function:ATP binding (GO:0005524)	vesicle-fusing ATPase	ATP-dependent 26S proteasome regulatory subunit	55.9059	52.8033	47.3657	52.1727	50.8708	PREDICTED: vesicle-fusing ATPase [Nicotiana tomentosiformis]	PREDICTED: Nicotiana sylvestris vesicle-fusing ATPase (LOC104212421), transcript variant X2, mRNA	vesicle-fusing ATPase	Vesicle-fusing ATPase OS=Arabidopsis thaliana GN=NSF PE=2 SV=2	ATPase family associated with various cellular activities (AAA)//PhoH-like protein//Type III restriction enzyme, res subunit//AAA domain (Cdc48 subfamily)//NB-ARC domain//RNA helicase//AAA domain (dynein-related subfamily)//ATPase family associated with various cellular activities (AAA)//Holliday junction DNA helicase ruvB N-terminus//TIP49 C-terminus//ABC transporter//Sigma-54 interaction domain…	tRNA threonylcarbamoyladenosine modification//regulation of transcription, DNA-templated//DNA repair//DNA recombination	ATP binding//RNA helicase activity//ADP binding//DNA helicase activity//four-way junction helicase activity//RNA binding//hydrolase activity//transcription factor binding//ATPase activity//DNA binding	AAA+-type ATPase
Tai6.707	1.58038	0.628937	0.775285	0.775658	0.843886	Biological Process:metabolic process (GO:0008152)	hydroquinone glucosyltransferase	UDP:flavonoid glycosyltransferase YjiC, YdhE family	0.69399	0.570391	0.634824	0.59044	0.597345	unnamed protein product [Coffea canephora]	Arabidopsis lyrata subsp. lyrata UDP-glucoronosyl/UDP-glucosyl transferase family protein, mRNA	--	UDP-glucose flavonoid 3-O-glucosyltransferase 6 OS=Fragaria ananassa GN=GT6 PE=1 SV=1	Glycosyltransferase family 28 C-terminal domain//UDP-glucoronosyl and UDP-glucosyl transferase//Colicin E1 (microcin) immunity protein	metabolic process//bacteriocin immunity//immune response	toxic substance binding//transferase activity, transferring hexosyl groups	--
Tai6.7055	1.11604	1.03716	1.09344	0.528031	0.664276	--	--	Zn-dependent alcohol dehydrogenase	56.8707	13.6934	28.2044	15.9818	17.1261	PREDICTED: alcohol dehydrogenase-like 1-like isoform X1 [Solanum tuberosum]	--	S-(hydroxymethyl)glutathione dehydrogenase / alcohol dehydrogenase	Alcohol dehydrogenase-like 1 OS=Arabidopsis thaliana GN=At1g22430 PE=2 SV=1	--	--	--	Alcohol dehydrogenase, class III
Tai6.7038	1.08402	0.945473	1.12606	1.40545	0.792494	--	--	--	23.2481	28.9124	27.2188	27.3945	28.5111	PREDICTED: uncharacterized protein At2g24330-like [Nicotiana sylvestris]	Ricinus communis conserved hypothetical protein, mRNA	--	Uncharacterized protein At2g24330 OS=Arabidopsis thaliana GN=At2g24330 PE=2 SV=1	Periplasmic glucan biosynthesis protein, MdoG	carbohydrate biosynthetic process	--	Predicted membrane protein
Tai6.7023	0.794974	1.19478	1.06601	1.90152	2.01748	Molecular Function:nucleotide binding (GO:0000166),Molecular Function:aminoacyl-tRNA ligase activity (GO:0004812),Molecular Function:ATP binding (GO:0005524),Cellular Component:cytoplasm (GO:0005737),Biological Process:tRNA aminoacylation for protein translation (GO:0006418)	glutaminyl-tRNA synthetase	--	4.36197	4.2086	4.88378	5.00558	5.6079	PREDICTED: glutamine--tRNA ligase [Sesamum indicum]	PREDICTED: Nicotiana sylvestris glutamine--tRNA ligase (LOC104244261), mRNA	glutaminyl-tRNA synthetase	Glutamine--tRNA ligase, cytoplasmic OS=Arabidopsis thaliana GN=OVA9 PE=2 SV=1	Glutaminyl-tRNA synthetase, non-specific RNA binding region part 1	tRNA aminoacylation for protein translation	nucleotide binding//ATP binding//aminoacyl-tRNA ligase activity	Glutaminyl-tRNA synthetase
Tai6.7015	0.948085	0.852199	0.758552	0.855476	0.916218	Molecular Function:ADP binding (GO:0043531)	disease resistance protein RPM1	Vesicle coat complex, various subunits	8.32349	6.35204	6.1999	9.40416	6.10354	PREDICTED: putative late blight resistance protein homolog R1A-3 [Nicotiana sylvestris]	Ipomoea batata isolate S5_A02 resistance gene analog genomic sequence	--	Putative late blight resistance protein homolog R1B-16 OS=Solanum demissum GN=R1B-16 PE=3 SV=1	Leucine rich repeat//NB-ARC domain	--	ADP binding//protein binding	--
Tai6.7002	0.941132	1.33633	1.08142	1.32881	1.26634	--	glycerol-3-phosphate O-acyltransferase 3/4	--	0.177554	0.580353	0.329951	0.51781	0.49287	PREDICTED: uncharacterized protein At1g04910-like isoform X1 [Solanum tuberosum]	PREDICTED: Sesamum indicum uncharacterized protein At1g04910-like (LOC105157909), mRNA	--	Uncharacterized protein At1g04910 OS=Arabidopsis thaliana GN=At1g04910 PE=2 SV=1	Acrosome formation-associated factor	fusion of sperm to egg plasma membrane//acrosomal vesicle exocytosis//endocytosis	--	--
Tai6.6997	1.15576	1.11787	1.32854	1.90468	1.95856	Molecular Function:protein kinase activity (GO:0004672),Molecular Function:ATP binding (GO:0005524),Biological Process:protein phosphorylation (GO:0006468),Biological Process:signal transduction (GO:0007165)	carbon catabolite-derepressing protein kinase	Serine/threonine protein kinase	0	0.0485757	0	0	0	PREDICTED: CBL-interacting serine/threonine-protein kinase 7-like [Nicotiana tomentosiformis]	PREDICTED: Nicotiana tomentosiformis CBL-interacting serine/threonine-protein kinase 7-like (LOC104121103), mRNA	--	CBL-interacting serine/threonine-protein kinase 4 OS=Arabidopsis thaliana GN=CIPK4 PE=1 SV=1	Protein kinase domain//NAF domain//Lipopolysaccharide kinase (Kdo/WaaP) family//Protein tyrosine kinase	protein phosphorylation//signal transduction	protein kinase activity//ATP binding//phosphotransferase activity, alcohol group as acceptor	--
Tai6.6935	1.06096	0.668314	0.4676	0	0	Molecular Function:nucleic acid binding (GO:0003676),Biological Process:nucleobase-containing compound metabolic process (GO:0006139),Molecular Function:3'-5' exonuclease activity (GO:0008408)	cation-transporting P-type ATPase D	--	6.3711	14.5009	12.7593	13.9208	12.9299	PREDICTED: uncharacterized protein LOC104096654 isoform X3 [Nicotiana tomentosiformis]	--	cation-transporting P-type ATPase D	--	3'-5' exonuclease	nucleobase-containing compound metabolic process	nucleic acid binding//3'-5' exonuclease activity	Exosome 3'-5' exoribonuclease complex, subunit PM/SCL-100 (Rrp6)
Tai6.6932	1.0555	0.994651	0.898015	0.796788	0.810908	Biological Process:metabolic process (GO:0008152)	aconitate hydratase	Aconitase A	0.352606	0.127329	0.0733382	0.193362	0.208514	PREDICTED: aconitate hydratase, cytoplasmic-like [Nelumbo nucifera]	PREDICTED: Nicotiana sylvestris aconitate hydratase, cytoplasmic (LOC104221546), mRNA	aconitate hydratase	Aconitate hydratase, cytoplasmic OS=Cucurbita maxima PE=2 SV=1	Aconitase C-terminal domain//Hydrogenase formation hypA family//Aconitase family (aconitate hydratase)//Acyl transferase	fatty acid metabolic process//metabolic process	transferase activity, transferring acyl groups//metal ion binding	RNA-binding translational regulator IRP (aconitase superfamily)
Tai6.6928	0.972611	0.835956	0.70833	0.532733	0.448884	Biological Process:drug transmembrane transport (GO:0006855),Molecular Function:drug transmembrane transporter activity (GO:0015238),Molecular Function:antiporter activity (GO:0015297),Cellular Component:membrane (GO:0016020),Biological Process:transmembrane transport (GO:0055085)	multidrug resistance protein, MATE family	Na+-driven multidrug efflux pump	3.90271	0.988536	1.23693	1.10532	1.97434	unnamed protein product [Coffea canephora]	Theobroma cacao MATE efflux family protein isoform 1 (TCM_011340) mRNA, complete cds	multidrug resistance protein, MATE family	Protein TRANSPARENT TESTA 12 OS=Arabidopsis thaliana GN=TT12 PE=2 SV=1	MatE	transport//transmembrane transport//drug transport//drug transmembrane transport	drug transmembrane transporter activity//antiporter activity	--
Tai6.6914	1.07013	0.924214	0.70823	0.548272	0.521057	--	--	--	4.89071	5.3099	3.94798	2.83246	3.51729	PREDICTED: uncharacterized protein LOC104226081 isoform X2 [Nicotiana sylvestris]	--	--	Mitogen-activated protein kinase homolog MMK2 OS=Medicago sativa GN=MMK2 PE=2 SV=1	--	--	--	--
Tai6.6911	1.04568	0.951733	0.79371	0.393875	0.480817	Molecular Function:metalloendopeptidase activity (GO:0004222),Biological Process:proteolysis (GO:0006508),Molecular Function:peptidase activity (GO:0008233),Biological Process:CAAX-box protein processing (GO:0071586)	STE24 endopeptidase	Zn-dependent protease with chaperone function	1.22682	2.07652	2.35376	1.24636	2.42808	PREDICTED: CAAX prenyl protease 1 homolog [Solanum lycopersicum]	PREDICTED: Solanum tuberosum CAAX prenyl protease 1 homolog (LOC102579900), mRNA	STE24 endopeptidase	CAAX prenyl protease 1 homolog OS=Arabidopsis thaliana GN=FACE1 PE=1 SV=1	Peptidase family M48	proteolysis	metalloendopeptidase activity	Metalloprotease
Tai6.6899	0.944041	0.607316	0.386628	0	0	--	--	--	214.998	286.423	243.344	241.141	243.345	PREDICTED: reticulon-like protein B5 [Nicotiana sylvestris]	Solanum lycopersicum cDNA, clone: LEFL3082B11, HTC in root	--	Reticulon-like protein B1 OS=Arabidopsis thaliana GN=RTNLB1 PE=1 SV=1	Oligosaccharyl transferase STT3 subunit	protein glycosylation	oligosaccharyl transferase activity	--
Tai6.6897	0.919743	0.814038	0.503356	0	0	--	large subunit ribosomal protein L46	--	0.359551	0.520522	0.390095	0.382027	0.656553	PREDICTED: 39S ribosomal protein L46, mitochondrial-like [Solanum lycopersicum]	--	large subunit ribosomal protein L46	39S ribosomal protein L46, mitochondrial OS=Pongo abelii GN=MRPL46 PE=2 SV=1	--	--	--	Mitochondrial ribosomal protein L17
Tai6.6874	1.05833	0.826235	0.584877	0	0	--	probable phosphoglycerate mutase	Broad specificity phosphatase PhoE	22.7002	25.3152	31.6805	35.6501	34.6904	PREDICTED: uncharacterized protein LOC104246204 [Nicotiana sylvestris]	PREDICTED: Nicotiana sylvestris uncharacterized LOC104246204 (LOC104246204), mRNA	--	2,3-bisphosphoglycerate-dependent phosphoglycerate mutase OS=Bartonella tribocorum (strain CIP 105476 / IBS 506) GN=gpmA PE=3 SV=1	--	--	--	--
Tai6.6873	0.753507	1.09218	0.826319	0	0	--	--	--	11.8642	26.2531	19.1349	21.5747	23.0654	PREDICTED: zinc finger protein 511 [Solanum lycopersicum]	--	--	--	--	--	--	--
Tai6.6864	0.964618	1.20633	1.21163	1.10112	0.951883	--	U4/U6.U5 tri-snRNP-associated protein 1	--	95.1366	105.648	137.385	124.602	113.344	PREDICTED: phosducin-like protein 3 isoform X2 [Nicotiana tomentosiformis]	--	--	Phosducin-like protein 3 OS=Homo sapiens GN=PDCL3 PE=1 SV=1	--	--	--	Conserved phosducin-like protein
Tai6.6846	1.05131	0.953533	0.575992	0	0	Molecular Function:oxidoreductase activity (GO:0016491),Molecular Function:flavin adenine dinucleotide binding (GO:0050660),Biological Process:oxidation-reduction process (GO:0055114)	--	FAD/FMN-containing dehydrogenase	7.63809	2.4453	1.38558	0.606454	0.643015	PREDICTED: tetrahydrocannabinolic acid synthase-like [Nicotiana tomentosiformis]	PREDICTED: Solanum tuberosum tetrahydrocannabinolic acid synthase-like (LOC102578664), mRNA	--	Cannabidiolic acid synthase-like 1 OS=Cannabis sativa GN=CBDAS2 PE=2 SV=1	Berberine and berberine like//FAD binding domain	oxidation-reduction process	flavin adenine dinucleotide binding//oxidoreductase activity	--
Tai6.6843	0.333333	0	0.253507	0.628156	0.8253	--	charged multivesicular body protein 2A	--	26.1117	26.3934	27.2761	24.3625	24.4109	PREDICTED: protein LSD1-like isoform X1 [Solanum tuberosum]	PREDICTED: Nicotiana tomentosiformis protein LOL1-like (LOC104093136), mRNA	--	Protein LOL1 OS=Arabidopsis thaliana GN=LOL1 PE=2 SV=1	Sec23/Sec24 zinc finger//Ribosomal protein S27	translation//ER to Golgi vesicle-mediated transport//intracellular protein transport//ribosome biogenesis	structural constituent of ribosome//zinc ion binding	--
Tai6.6831	1.23248	0.919658	0.582906	0	0	Molecular Function:catalytic activity (GO:0003824),Molecular Function:coenzyme binding (GO:0050662)	farnesol dehydrogenase	Nucleoside-diphosphate-sugar epimerase	10.3595	10.361	8.50674	7.52041	7.75862	PREDICTED: dihydroflavonol-4-reductase-like isoform X1 [Nicotiana sylvestris]	PREDICTED: Solanum tuberosum dihydroflavonol-4-reductase-like (LOC102604685), mRNA	farnesol dehydrogenase	Putative dihydroflavonol-4-reductase OS=Synechocystis sp. (strain PCC 6803 / Kazusa) GN=dfrA PE=3 SV=1	3-beta hydroxysteroid dehydrogenase/isomerase family//short chain dehydrogenase//NAD dependent epimerase/dehydratase family	C21-steroid hormone metabolic process//estrogen metabolic process//oxidation-reduction process//androgen metabolic process//metabolic process//steroid biosynthetic process	oxidoreductase activity//coenzyme binding//catalytic activity//3-beta-hydroxy-delta5-steroid dehydrogenase activity//oxidoreductase activity, acting on the CH-OH group of donors, NAD or NADP as acceptor	--
Tai6.681	1.02033	0.945789	0.914475	0.856047	0.871091	--	--	--	48.9506	34.8941	38.4585	33.131	33.0682	unnamed protein product [Coffea canephora]	PREDICTED: Cicer arietinum outer envelope pore protein 24, chloroplastic (LOC101506636), mRNA	--	Outer envelope pore protein 24, chloroplastic OS=Pisum sativum GN=OEP24 PE=1 SV=1	--	--	--	--
Tai6.6805	0.95026	1.22012	1.0871	0.829011	1.11175	--	phenylpyruvate tautomerase	Phenylpyruvate tautomerase PptA, 4-oxalocrotonate tautomerase family	0.12222	0.183392	0.185682	0.142706	0.13494	Macrophage migration inhibitory factor like [Glycine soja]	Solanum lycopersicum chromosome ch10, complete genome	phenylpyruvate tautomerase	Macrophage migration inhibitory factor homolog OS=Brugia malayi GN=Bm1_28435 PE=3 SV=4	Tautomerase enzyme	cellular aromatic compound metabolic process	isomerase activity	Macrophage migration inhibitory factor
Tai6.6800	0.942257	1.28421	1.2198	1.20808	1.30861	Biological Process:iron ion transport (GO:0006826),Biological Process:cellular iron ion homeostasis (GO:0006879),Molecular Function:ferric iron binding (GO:0008199)	ferritin heavy chain	Ferritin	169.653	306.414	227.322	295.911	248.47	Ferretin 1 isoform 1 [Theobroma cacao]>gi|508715198|gb|EOY07095.1| Ferretin 1 isoform 1 [Theobroma cacao]	Theobroma cacao Ferretin 1 isoform 1 (TCM_021608) mRNA, complete cds	ferritin heavy chain	Ferritin, chloroplastic OS=Phaseolus vulgaris GN=PFE PE=2 SV=1	Ubiquinone biosynthesis protein COQ7//Mitochondrial small ribosomal subunit Rsm22//Ferritin-like domain//Rubrerythrin	oxidation-reduction process//translation//cellular iron ion homeostasis//ubiquinone biosynthetic process	methyltransferase activity//ferric iron binding//oxidoreductase activity//metal ion binding	Ferritin
Tai6.6797	0.913872	1.06509	0.933243	0.972594	0.961759	--	ubiquitin-activating enzyme E1	--	54.0207	43.3661	47.4101	42.3511	47.7026	ubiquitin activating enzyme E1 [Camellia sinensis]	Camellia sinensis ubiquitin activating enzyme E1 mRNA, complete cds	ubiquitin-activating enzyme E1	Ubiquitin-activating enzyme E1 1 OS=Arabidopsis thaliana GN=UBA1 PE=1 SV=1	--	--	--	Ubiquitin activating enzyme UBA1
Tai6.6791	0.850013	0.748384	0.470908	0	0	Molecular Function:protein binding (GO:0005515),Molecular Function:chaperone binding (GO:0051087)	BCL2-associated athanogene 1	--	37.6119	28.1051	32.0928	27.6294	28.2726	PREDICTED: BAG family molecular chaperone regulator 4-like isoform X1 [Nicotiana sylvestris]	--	--	BAG family molecular chaperone regulator 3 OS=Arabidopsis thaliana GN=BAG3 PE=1 SV=1	Ubiquitin-like domain//Ubiquitin family//Nucleopolyhedrovirus P10 protein//PB1 domain//BAG domain	--	protein binding//chaperone binding	--
Tai6.6785	0.825145	0.728899	0.711627	0.656046	0.691287	Molecular Function:electron carrier activity (GO:0009055),Molecular Function:protein disulfide oxidoreductase activity (GO:0015035),Biological Process:cell redox homeostasis (GO:0045454)	monothiol glutaredoxin	Glutaredoxin-related protein	22.4827	37.2578	48.2711	53.4037	53.204	PREDICTED: monothiol glutaredoxin-S16, chloroplastic-like [Solanum tuberosum]	Theobroma cacao CAX-interacting protein 2 (TCM_021671) mRNA, complete cds	--	Bifunctional monothiol glutaredoxin-S16, chloroplastic OS=Arabidopsis thaliana GN=GRXS16 PE=1 SV=2	Glutathione S-transferase, N-terminal domain//Glutaredoxin	cell redox homeostasis//obsolete electron transport	protein binding//protein disulfide oxidoreductase activity//electron carrier activity	Glutaredoxin-related protein
Tai6.6776	0.922222	1.00556	0.701665	0.391321	0.611485	Molecular Function:structural constituent of ribosome (GO:0003735),Cellular Component:ribosome (GO:0005840),Biological Process:translation (GO:0006412)	large subunit ribosomal protein L18Ae	--	220.54	209.865	272.369	186.191	174.891	PREDICTED: 60S ribosomal protein L18a [Solanum lycopersicum]	PREDICTED: Solanum lycopersicum 60S ribosomal protein L18a (LOC101245264), mRNA	large subunit ribosomal protein L18Ae	60S ribosomal protein L18a OS=Castanea sativa GN=RPL18A PE=2 SV=1	Ribosomal L18ae/LX protein domain	ribosome biogenesis//translation	structural constituent of ribosome	60S ribosomal protein L18A
Tai6.6765	0.826748	0.593097	0.396458	0	0	Molecular Function:aspartic-type endopeptidase activity (GO:0004190),Biological Process:proteolysis (GO:0006508)	--	--	0	0.0334708	0	0	0	PREDICTED: aspartic proteinase Asp1 [Nicotiana tomentosiformis]	PREDICTED: Nicotiana tomentosiformis aspartic proteinase Asp1 (LOC104121588), mRNA	--	Aspartic proteinase Asp1 OS=Oryza sativa subsp. japonica GN=ASP1 PE=2 SV=1	Fragile X-related 1 protein core C terminal//Eukaryotic aspartyl protease	proteolysis	RNA binding//aspartic-type endopeptidase activity	--
Tai6.6763	1.13839	1.02865	0.809152	0	0	Molecular Function:calcium ion binding (GO:0005509),Cellular Component:photosystem II (GO:0009523),Cellular Component:photosystem II oxygen evolving complex (GO:0009654),Biological Process:photosynthesis (GO:0015979),Cellular Component:extrinsic component of membrane (GO:0019898)	photosystem II oxygen-evolving enhancer protein 2	--	0.0371237	0	0.0370242	0	0	PREDICTED: psbP domain-containing protein 2, chloroplastic [Sesamum indicum]	PREDICTED: Nicotiana sylvestris psbP domain-containing protein 2, chloroplastic (LOC104220513), mRNA	--	PsbP domain-containing protein 2, chloroplastic OS=Arabidopsis thaliana GN=PPD2 PE=1 SV=1	PsbP	photosynthesis	calcium ion binding	--
Tai6.6756	1.02945	0.851548	0.95293	1.4627	1.57507	Molecular Function:nucleic acid binding (GO:0003676),Molecular Function:RNA binding (GO:0003723),Biological Process:RNA processing (GO:0006396)	U2-associated protein SR140	--	55.6171	67.4248	67.6616	73.3961	66.1394	PREDICTED: U2 snRNP-associated SURP motif-containing protein-like isoform X2 [Nicotiana sylvestris]	PREDICTED: Nicotiana tomentosiformis U2 snRNP-associated SURP motif-containing protein-like (LOC104097193), transcript variant X4, mRNA	U2-associated protein SR140	U2 snRNP-associated SURP motif-containing protein OS=Mus musculus GN=U2surp PE=2 SV=3	RNA recognition motif//Surp module//RNA recognition motif. (a.k.a. RRM, RBD, or RNP domain)	RNA processing	nucleic acid binding//RNA binding	Predicted splicing regulator, contains RRM, SWAP and RPR domains
Tai6.6750	1.0056	1.34652	1.29804	1.56936	1.49855	Molecular Function:ATP binding (GO:0005524),Biological Process:protein folding (GO:0006457),Biological Process:response to stress (GO:0006950),Molecular Function:unfolded protein binding (GO:0051082)	heat shock protein 90kDa beta	Molecular chaperone, HSP90 family	32.1937	93.1273	101.728	98.354	87.4968	heat shock protein 90 [Ipomoea nil]	Ipomoea nil heat shock protein 90 mRNA, complete cds; nuclear gene for chloroplast product	heat shock protein 90kDa beta	Endoplasmin homolog OS=Caenorhabditis elegans GN=enpl-1 PE=3 SV=1	Hsp90 protein	response to stress//protein folding	ATP binding//unfolded protein binding	Endoplasmic reticulum glucose-regulated protein (GRP94/endoplasmin), HSP90 family
Tai6.6741	1.00682	1.03855	0.684408	0	0	Biological Process:rRNA processing (GO:0006364),Cellular Component:small-subunit processome (GO:0032040)	U3 small nucleolar RNA-associated protein 14	--	17.1501	20.9445	23.25	20.6204	17.6097	PREDICTED: U3 small nucleolar RNA-associated protein 14 homolog A [Nicotiana tomentosiformis]	PREDICTED: Solanum lycopersicum U3 small nucleolar RNA-associated protein 14 homolog A (LOC101245392), mRNA	U3 small nucleolar RNA-associated protein 14	Uncharacterized protein C57A7.06 OS=Schizosaccharomyces pombe (strain 972 / ATCC 24843) GN=SPAC57A7.06 PE=1 SV=1	Utp14 protein	rRNA processing	--	Uncharacterized conserved protein
Tai6.669	0.822288	0.721519	0.743762	1.20937	1.17876	--	tRNA (guanine9-N1)-methyltransferase	--	26.6381	35.616	24.9184	24.6666	27.0674	PREDICTED: protein CYPRO4-like [Nicotiana tomentosiformis]	PREDICTED: Nicotiana tomentosiformis protein CYPRO4-like (LOC104106973), mRNA	--	Protein CYPRO4 OS=Cynara cardunculus GN=CYPRO4 PE=2 SV=1	--	--	--	Protein involved in vacuole import and degradation
Tai6.6671	1.03212	1.35102	1.59046	0.509375	0.575208	Molecular Function:protein binding (GO:0005515)	ribosomal RNA-processing protein 9	Predicted NTPase, NACHT family domain	12.0992	27.9966	24.8751	18.8987	17.7253	PREDICTED: U3 small nucleolar RNA-interacting protein 2-like [Solanum tuberosum]	--	ribosomal RNA-processing protein 9	U3 snoRNP-associated protein-like YAO OS=Arabidopsis thaliana GN=YAO PE=2 SV=1	WD domain, G-beta repeat	--	protein binding	U3 snoRNP-associated protein (contains WD40 repeats)
Tai6.665	0.939701	1.51134	1.86513	1.7541	1.4302	--	--	--	110.022	133.914	137.259	115.095	118.42	PREDICTED: uncharacterized protein At1g47420, mitochondrial [Solanum lycopersicum]	Solanum lycopersicum cDNA, clone: LEFL1002AH03, HTC in leaf	--	Succinate dehydrogenase subunit 5, mitochondrial OS=Arabidopsis thaliana GN=SDH5 PE=1 SV=1	--	--	--	--
Tai6.6649	1.05075	1.46244	1.0228	0.857228	0.895815	--	--	--	535.467	403.062	478.566	469.589	451.95	--	PREDICTED: Nicotiana sylvestris uncharacterized LOC104218066 (LOC104218066), ncRNA	--	--	--	--	--	--
Tai6.6643	0.82	1.1	0.962789	0.969728	1.04406	Molecular Function:structural molecule activity (GO:0005198),Molecular Function:protein binding (GO:0005515),Biological Process:intracellular protein transport (GO:0006886),Biological Process:vesicle-mediated transport (GO:0016192),Cellular Component:membrane coat (GO:0030117)	coatomer, subunit beta'	Predicted ATPase	26.2393	38.4314	41.0946	50.0099	49.9163	PREDICTED: coatomer subunit beta'-2-like [Nicotiana tomentosiformis]>gi|697109098|ref|XP_009608403.1| PREDICTED: coatomer subunit beta'-2-like [Nicotiana tomentosiformis]>gi|697109100|ref|XP_009608404.1| PREDICTED: coatomer subunit beta'-2-like [Nicotiana tomentosiformis]	PREDICTED: Nicotiana sylvestris coatomer subunit beta'-1 (LOC104240870), transcript variant X8, mRNA	coatomer, subunit beta'	Coatomer subunit beta'-1 OS=Arabidopsis thaliana GN=At1g79990 PE=2 SV=2	Coatomer WD associated region//Domain of unknown function (DUF1729)//WD domain, G-beta repeat//Region in Clathrin and VPS	acyl-carrier-protein biosynthetic process//vesicle-mediated transport//fatty acid biosynthetic process//oxidation-reduction process//intracellular protein transport	protein binding//enoyl-[acyl-carrier-protein] reductase (NADH) activity//structural molecule activity	Vesicle coat complex COPI, beta' subunit
Tai6.664	0.888186	0.754747	0.77836	0.813296	1.02703	--	--	--	0.042644	0	0.014263	0.0129261	0	PREDICTED: protein WEAK CHLOROPLAST MOVEMENT UNDER BLUE LIGHT 1-like isoform X2 [Nicotiana sylvestris]	PREDICTED: Nicotiana tomentosiformis protein WEAK CHLOROPLAST MOVEMENT UNDER BLUE LIGHT 1-like (LOC104120324), transcript variant X2, mRNA	--	Protein WEAK CHLOROPLAST MOVEMENT UNDER BLUE LIGHT 1 OS=Arabidopsis thaliana GN=WEB1 PE=1 SV=1	Tetrahydromethanopterin S-methyltransferase subunit B	methanogenesis//folic acid biosynthetic process	tetrahydromethanopterin S-methyltransferase activity	--
Tai6.6637	1.10389	1.36483	0.802863	0	0	Molecular Function:nucleotide binding (GO:0000166),Molecular Function:nucleic acid binding (GO:0003676),Molecular Function:alanine-tRNA ligase activity (GO:0004813),Molecular Function:ATP binding (GO:0005524),Cellular Component:cytoplasm (GO:0005737),Biological Process:alanyl-tRNA aminoacylation (GO:0006419)	alanyl-tRNA synthetase	Alanyl-tRNA synthetase	90.876	88.0644	108.416	102.306	97.2204	PREDICTED: alanine--tRNA ligase-like [Solanum tuberosum]	PREDICTED: Solanum tuberosum alanine--tRNA ligase-like (LOC102591893), mRNA	alanyl-tRNA synthetase	Alanine--tRNA ligase OS=Arabidopsis thaliana GN=ALATS PE=1 SV=3	tRNA synthetases class II (A)	alanyl-tRNA aminoacylation//alanine metabolic process//aspartate metabolic process	nucleotide binding//alanine-tRNA ligase activity//ATP binding	Alanyl-tRNA synthetase
Tai6.6634	0.647316	0.437658	0.261316	0	0	--	BolA protein	Stress-induced morphogen (activity unknown)	6.6554	6.68329	7.17373	5.26198	7.74593	PREDICTED: uncharacterized protein LOC104097018 [Nicotiana tomentosiformis]	--	--	Protein BOLA4, chloroplastic/mitochondrial OS=Arabidopsis thaliana GN=BOLA4 PE=1 SV=1	Heme exporter protein D (CcmD)	cytochrome complex assembly//heme transport	--	--
Tai6.6627	0.924905	0.706105	0.64703	0.363975	0.289855	Biological Process:metabolic process (GO:0008152),Molecular Function:hydrolase activity (GO:0016787)	gibberellin receptor GID1	Acetyl esterase/lipase	22.3391	7.41073	7.7882	9.34438	9.5308	PREDICTED: probable carboxylesterase 18 [Nicotiana sylvestris]	Nicotiana tabacum NtMET1 mRNA for DNA methyltransferase type 1, complete cds	--	Probable carboxylesterase 18 OS=Arabidopsis thaliana GN=CXE18 PE=1 SV=1	Chlorophyllase enzyme//tRNA synthetase B5 domain//alpha/beta hydrolase fold//Chlorophyllase	chlorophyll catabolic process//metabolic process//chlorophyll metabolic process//phenylalanyl-tRNA aminoacylation	chlorophyllase activity//hydrolase activity//RNA binding//ATP binding//magnesium ion binding	--
Tai6.6621	1.01852	1.35306	1.25341	1.16481	1.4019	Biological Process:ATP hydrolysis coupled proton transport (GO:0015991)	V-type H+-transporting ATPase subunit H	--	0.389963	0.85277	0.560919	0.759708	0.321431	PREDICTED: V-type proton ATPase subunit H [Nicotiana tomentosiformis]>gi|697109658|ref|XP_009608693.1| PREDICTED: V-type proton ATPase subunit H [Nicotiana tomentosiformis]	PREDICTED: Solanum lycopersicum V-type proton ATPase subunit H-like (LOC101264594), mRNA	V-type H+-transporting ATPase subunit H	Probable V-type proton ATPase subunit H OS=Oryza sativa subsp. japonica GN=Os07g0549700 PE=2 SV=1	--	--	--	Vacuolar H+-ATPase V1 sector, subunit H
Tai6.662	0.971149	1.57805	1.57342	0	0	--	DNA-directed RNA polymerase V subunit 1	--	24.3723	27.7133	45.6899	29.7375	38.4044	PREDICTED: protein DCL, chloroplastic [Cucumis melo]	--	--	Protein DCL, chloroplastic OS=Solanum lycopersicum GN=DCL PE=2 SV=1	--	--	--	--
Tai6.6604	0.755556	0.764539	0.563903	0.306306	0.432432	Cellular Component:lysosome (GO:0005764),Biological Process:lipid metabolic process (GO:0006629),Biological Process:sphingolipid metabolic process (GO:0006665)	saposin	--	531.923	189.73	213.579	208.747	206.284	PREDICTED: proactivator polypeptide-like isoform X1 [Solanum tuberosum]>gi|565365766|ref|XP_006349571.1| PREDICTED: proactivator polypeptide-like isoform X2 [Solanum tuberosum]	--	saposin	Prosaposin OS=Homo sapiens GN=PSAP PE=1 SV=2	Saposin-like type B, region 1//RING-H2 zinc finger	lipid metabolic process	zinc ion binding	Prosaposin
Tai6.6602	1.12678	0.745866	0.448216	0	0	Biological Process:cellular amino acid metabolic process (GO:0006520),Molecular Function:transaminase activity (GO:0008483),Biological Process:biosynthetic process (GO:0009058),Molecular Function:pyridoxal phosphate binding (GO:0030170)	aspartate aminotransferase, mitochondrial	Aspartate/tyrosine/aromatic aminotransferase	23.7837	51.3309	61.7955	61.8681	102.391	PREDICTED: aspartate aminotransferase, mitochondrial-like isoform X1 [Nicotiana tomentosiformis]	PREDICTED: Nicotiana sylvestris aspartate aminotransferase, mitochondrial-like (LOC104225333), mRNA	aspartate aminotransferase, mitochondrial	Aspartate aminotransferase, mitochondrial OS=Arabidopsis thaliana GN=ASP1 PE=1 SV=1	Aminotransferase class I and II	biosynthetic process	pyridoxal phosphate binding	Aspartate aminotransferase/Glutamic oxaloacetic transaminase AAT1/GOT2
Tai6.6599	0.950163	1.5674	0.75	0	0	Molecular Function:oxidoreductase activity (GO:0016491),Molecular Function:heme binding (GO:0020037),Molecular Function:iron-sulfur cluster binding (GO:0051536),Biological Process:oxidation-reduction process (GO:0055114)	sulfite reductase (ferredoxin)	Sulfite reductase, beta subunit (hemoprotein)	24.085	24.0696	23.3357	19.7214	21.3692	PREDICTED: sulfite reductase 1 [ferredoxin], chloroplastic [Nicotiana tomentosiformis]	PREDICTED: Nicotiana tomentosiformis sulfite reductase 1 [ferredoxin], chloroplastic (LOC104098131), mRNA	sulfite reductase (ferredoxin)	Sulfite reductase 1 [ferredoxin], chloroplastic OS=Nicotiana tabacum GN=SIR1 PE=1 SV=1	Ptu family//Nitrite and sulphite reductase 4Fe-4S domain//Nitrite/Sulfite reductase ferredoxin-like half domain	oxidation-reduction process//transport//pathogenesis	iron-sulfur cluster binding//heme binding//calcium channel inhibitor activity//oxidoreductase activity	Sulfite reductase (ferredoxin)
Tai6.6595	0.726056	0.467006	0.315422	0	0	Cellular Component:exosome (RNase complex) (GO:0000178),Biological Process:RNA processing (GO:0006396)	exosome complex component RRP45	Exosome complex RNA-binding protein Rrp42, RNase PH superfamily	16.4615	16.0373	23.2205	20.8563	18.5323	unnamed protein product [Coffea canephora]	PREDICTED: Nicotiana tomentosiformis protein RRP45A-like (LOC104104024), transcript variant X1, mRNA	exosome complex component RRP45	Protein ECERIFERUM 7 OS=Arabidopsis thaliana GN=CER7 PE=2 SV=1	TraM protein, DNA-binding	conjugation	DNA binding	Exosomal 3'-5' exoribonuclease complex, subunit Rrp45
Tai6.6588	0.841864	0.470037	0.352892	0	0	--	(+)-neomenthol dehydrogenase	NAD(P)-dependent dehydrogenase, short-chain alcohol dehydrogenase family	2.54191	0.113103	0.0360955	0	0	PREDICTED: uncharacterized protein LOC101261456 [Solanum lycopersicum]	--	(+)-neomenthol dehydrogenase	(+)-neomenthol dehydrogenase OS=Capsicum annuum GN=MNR1 PE=1 SV=1	3-beta hydroxysteroid dehydrogenase/isomerase family//Lipid-A-disaccharide synthetase//NAD dependent epimerase/dehydratase family//short chain dehydrogenase	estrogen metabolic process//C21-steroid hormone metabolic process//steroid biosynthetic process//metabolic process//androgen metabolic process//oxidation-reduction process//lipid A biosynthetic process	catalytic activity//coenzyme binding//oxidoreductase activity//lipid-A-disaccharide synthase activity//oxidoreductase activity, acting on the CH-OH group of donors, NAD or NADP as acceptor//3-beta-hydroxy-delta5-steroid dehydrogenase activity	--
Tai6.6582	0.55565	0.336024	0.49855	0.74852	0.720206	Molecular Function:oxidoreductase activity (GO:0016491),Biological Process:oxidation-reduction process (GO:0055114)	2,4-dihydroxy-1,4-benzoxazin-3-one-glucoside dioxygenase	Isopenicillin N synthase and related dioxygenases	194.063	42.0283	65.0103	34.2706	44.6221	PREDICTED: 1-aminocyclopropane-1-carboxylate oxidase homolog 1-like [Sesamum indicum]	--	--	1-aminocyclopropane-1-carboxylate oxidase homolog 3 OS=Arabidopsis thaliana GN=At1g06650 PE=2 SV=1	2OG-Fe(II) oxygenase superfamily//TIP49 C-terminus	oxidation-reduction process	ATP binding//oxidoreductase activity//DNA helicase activity	--
Tai6.6580	0.837702	0.886153	0.673713	0.915419	0.573155	--	(+)-neomenthol dehydrogenase	NAD(P)-dependent dehydrogenase, short-chain alcohol dehydrogenase family	0	0.0121216	0.034261	0.0105176	0	PREDICTED: (+)-neomenthol dehydrogenase-like [Solanum tuberosum]	--	(+)-neomenthol dehydrogenase	(+)-neomenthol dehydrogenase OS=Capsicum annuum GN=MNR1 PE=1 SV=1	NAD dependent epimerase/dehydratase family//short chain dehydrogenase//2OG-Fe(II) oxygenase superfamily	metabolic process//oxidation-reduction process	catalytic activity//coenzyme binding//oxidoreductase activity	--
Tai6.6574	0.925926	0.906642	0.616162	0	0	Molecular Function:polygalacturonate 4-alpha-galacturonosyltransferase activity (GO:0047262)	alpha-1,4-galacturonosyltransferase	Lipopolysaccharide biosynthesis protein, LPS:glycosyltransferase	101.541	206.408	146.217	150.724	168.191	PREDICTED: probable galacturonosyltransferase 4 [Sesamum indicum]>gi|747095937|ref|XP_011095866.1| PREDICTED: probable galacturonosyltransferase 4 [Sesamum indicum]>gi|747095939|ref|XP_011095867.1| PREDICTED: probable galacturonosyltransferase 4 [Sesamum indicum]>gi|747095941|ref|XP_011095868.1| PREDICTED: probable galacturonosyltransferase 4 [Sesamum indicum]	PREDICTED: Nicotiana tomentosiformis probable galacturonosyltransferase 4 (LOC104104331), transcript variant X3, mRNA	alpha-1,4-galacturonosyltransferase	Probable galacturonosyltransferase 4 OS=Arabidopsis thaliana GN=GAUT4 PE=2 SV=1	Glycosyl transferase family 8	--	transferase activity, transferring glycosyl groups	--
Tai6.6555	1.02206	0.423967	0.284231	0	0	--	--	--	5.24337	4.48994	4.41697	3.76599	5.06365	PREDICTED: 15 kDa selenoprotein [Nicotiana sylvestris]	PREDICTED: Nicotiana tomentosiformis 15 kDa selenoprotein (LOC104097565), mRNA	--	15 kDa selenoprotein OS=Homo sapiens GN=SEP15 PE=1 SV=3	--	--	--	Selenoprotein
Tai6.6547	0.333333	0	0.434679	1.22644	1.17221	Molecular Function:ADP binding (GO:0043531)	disease resistance protein RPM1	Predicted ATPase	15.5678	45.0247	48.8303	67.2542	53.5057	PREDICTED: putative late blight resistance protein homolog R1B-14 [Nicotiana tomentosiformis]>gi|697121958|ref|XP_009614966.1| PREDICTED: putative late blight resistance protein homolog R1B-14 [Nicotiana tomentosiformis]	Ipomoea batata isolate S4_G01 resistance gene analog genomic sequence	--	Disease resistance protein RPP13 OS=Arabidopsis thaliana GN=RPP13 PE=2 SV=2	Protein of unknown function, DUF258//CorA-like Mg2+ transporter protein//Vertebrate heat shock transcription factor//NB-ARC domain	transmembrane transport//regulation of transcription, DNA-templated//metal ion transport	ADP binding//GTP binding//DNA binding//transcription factor activity, sequence-specific DNA binding//GTPase activity//metal ion transmembrane transporter activity	--
Tai6.6544	0.333333	0	0.348433	1.16006	1.1778	Molecular Function:ADP binding (GO:0043531)	disease resistance protein RPM1	--	22.0395	29.2792	14.6651	22.8846	15.4663	NBS-LRR protein [Ipomoea batatas]	Ipomoea batatas cultivar Beauregard clone BAC117E14, complete sequence	--	Putative late blight resistance protein homolog R1B-8 OS=Solanum demissum GN=R1B-8 PE=5 SV=1	Cytochrome c oxidase subunit III//NB-ARC domain//ABC transporter	--	ADP binding//heme-copper terminal oxidase activity//ATPase activity//ATP binding	--
Tai6.6542	0.832689	0.53823	0.556772	0.518917	0.531462	Molecular Function:ADP binding (GO:0043531)	disease resistance protein RPM1	Vesicle coat complex, various subunits	2.58284	1.8309	0.859122	0.81225	0.659874	PREDICTED: putative late blight resistance protein homolog R1A-3 [Nicotiana tomentosiformis]	Ipomoea batata isolate S4_E12 resistance gene analog genomic sequence	--	Disease resistance protein RPP13 OS=Arabidopsis thaliana GN=RPP13 PE=2 SV=2	NB-ARC domain//Archaeal ATPase//Apolipophorin-III precursor (apoLp-III)	lipid transport	ATP binding//lipid binding//ADP binding	--
Tai6.6539	0.986167	0.993927	1.03617	1.14639	1.07356	Biological Process:metabolic process (GO:0008152)	pyruvate dehydrogenase E2 component (dihydrolipoamide acetyltransferase)	Pyruvate/2-oxoglutarate dehydrogenase complex, dihydrolipoamide acyltransferase (E2) component	12.5263	14.815	18.4871	14.0108	14.5911	PREDICTED: dihydrolipoyllysine-residue acetyltransferase component 4 of pyruvate dehydrogenase complex, chloroplastic-like [Nicotiana sylvestris]	PREDICTED: Vitis vinifera dihydrolipoyllysine-residue acetyltransferase component 4 of pyruvate dehydrogenase complex, chloroplastic (LOC100261197), mRNA	pyruvate dehydrogenase E2 component (dihydrolipoamide acetyltransferase)	Dihydrolipoyllysine-residue acetyltransferase component 4 of pyruvate dehydrogenase complex, chloroplastic OS=Arabidopsis thaliana GN=LTA2 PE=2 SV=1	2-oxoacid dehydrogenases acyltransferase (catalytic domain)//e3 binding domain	metabolic process	transferase activity, transferring acyl groups	Dihydrolipoamide acetyltransferase
Tai6.6502	0.333333	0	0.263566	0.883721	1	Cellular Component:membrane (GO:0016020),Molecular Function:cellulose synthase (UDP-forming) activity (GO:0016760),Biological Process:cellulose biosynthetic process (GO:0030244)	cellulose synthase A	Glycosyltransferase, catalytic subunit of cellulose synthase and poly-beta-1,6-N-acetylglucosamine synthase	29.6512	43.265	34.5796	23.8858	39.1979	PREDICTED: cellulose synthase A catalytic subunit 1 [UDP-forming] [Vitis vinifera]	PREDICTED: Nicotiana sylvestris cellulose synthase A catalytic subunit 1 [UDP-forming]-like (LOC104219343), mRNA	cellulose synthase A	Cellulose synthase A catalytic subunit 1 [UDP-forming] OS=Arabidopsis thaliana GN=CESA1 PE=1 SV=1	Pectinesterase//Orn/Lys/Arg decarboxylase, N-terminal domain//Cellulose synthase	UDP-glucose metabolic process//sucrose metabolic process//starch metabolic process//cellulose biosynthetic process//cell wall modification	cellulose synthase (UDP-forming) activity//pectinesterase activity//carboxy-lyase activity	--
Tai6.6500	1.05849	2.02743	1.47742	1.31313	1.29798	--	nucleolar protein 4	--	0.134094	0.253648	0.344423	0.161128	0.141687	PREDICTED: single-stranded DNA-binding protein WHY1, chloroplastic-like [Nicotiana sylvestris]	PREDICTED: Brassica rapa single-stranded DNA-binding protein WHY3, chloroplastic (LOC103827509), transcript variant X2, mRNA	--	Single-stranded DNA-binding protein WHY1, chloroplastic OS=Solanum tuberosum GN=WHY1 PE=1 SV=1	--	--	--	--
Tai6.650	0.933033	0.343275	0.310183	0.29994	0.245329	--	--	--	0.214308	0.368985	0.421768	0.299953	0.156933	PREDICTED: elongation factor Tu, mitochondrial [Tarenaya hassleriana]	PREDICTED: Solanum tuberosum elongation factor Tu, mitochondrial-like (LOC102602312), mRNA	elongation factor Tu	Elongation factor Tu, mitochondrial OS=Arabidopsis thaliana GN=TUFA PE=1 SV=1	--	--	--	Mitochondrial translation elongation factor Tu
Tai6.6493	1.01628	1.41746	1.80769	2.06359	2.334	--	hydroxyacylglutathione hydrolase	Glyoxylase or a related metal-dependent hydrolase, beta-lactamase superfamily II	46.638	47.5776	47.0126	38.3127	41.8257	PREDICTED: probable hydroxyacylglutathione hydrolase 2, chloroplast [Nicotiana tomentosiformis]	--	hydroxyacylglutathione hydrolase	Probable hydroxyacylglutathione hydrolase 2, chloroplast OS=Arabidopsis thaliana GN=GLX2-4 PE=2 SV=1	--	--	--	--
Tai6.6491	0.958457	0.613007	0.407023	0	0	Molecular Function:sequence-specific DNA binding (GO:0043565)	cyclic AMP-dependent transcription factor ATF-4	--	19.9486	21.2174	25.3988	31.4261	30.9628	bZIP transcription factor family protein 11 [Camellia sinensis]	Camellia sinensis bZIP transcription factor family protein 11 mRNA, complete cds	--	Transcription factor RF2a OS=Oryza sativa subsp. japonica GN=RF2a PE=1 SV=1	Protein of unknown function (DUF904)//Protein of unknown function (DUF972)//Centromere protein H (CENP-H)//Centrosomin N-terminal motif 1//bZIP transcription factor//Uso1 / p115 like vesicle tethering protein, C terminal region//Leucine-rich repeats of kinetochore protein Cenp-F/LEK1//Septum formation initiator	kinetochore assembly//barrier septum assembly//cell cycle//protein transport//regulation of transcription, DNA-templated//DNA replication//FtsZ-dependent cytokinesis//intracellular protein transport	sequence-specific DNA binding//protein homodimerization activity//dynein binding//transcription factor binding//protein transporter activity//transcription factor activity, sequence-specific DNA binding	--
Tai6.649	0.961481	0.88237	0.747719	0.627502	0.558529	Molecular Function:GTPase activity (GO:0003924),Molecular Function:GTP binding (GO:0005525)	elongation factor Tu	Translation elongation factor EF-Tu, a GTPase	0.368057	0.282637	0.46482	0.162749	1.41362	PREDICTED: elongation factor Tu, mitochondrial [Nicotiana sylvestris]	PREDICTED: Nicotiana sylvestris elongation factor Tu, mitochondrial-like (LOC104235238), mRNA	elongation factor Tu	Elongation factor Tu, mitochondrial OS=Arabidopsis thaliana GN=TUFA PE=1 SV=1	Cytochrome c552//50S ribosome-binding GTPase//Elongation factor Tu domain 2	nitrogen compound metabolic process//oxidation-reduction process	GTP binding//nitrite reductase (cytochrome, ammonia-forming) activity	Mitochondrial translation elongation factor Tu
Tai6.6489	1.02503	0.974308	0.635705	0	0	--	dynein heavy chain, axonemal	Predicted O-linked N-acetylglucosamine transferase, SPINDLY family	26.6743	22.1039	23.4378	23.2887	18.6148	PREDICTED: probable UDP-N-acetylglucosamine--peptide N-acetylglucosaminyltransferase SPINDLY-like isoform X1 [Solanum tuberosum]>gi|565348149|ref|XP_006341080.1| PREDICTED: probable UDP-N-acetylglucosamine--peptide N-acetylglucosaminyltransferase SPINDLY-like isoform X2 [Solanum tuberosum]	PREDICTED: Nicotiana tomentosiformis probable UDP-N-acetylglucosamine--peptide N-acetylglucosaminyltransferase SPINDLY (LOC104112430), transcript variant X2, mRNA	--	Probable UDP-N-acetylglucosamine--peptide N-acetylglucosaminyltransferase SPINDLY OS=Solanum lycopersicum GN=SPY PE=2 SV=1	--	--	--	O-linked N-acetylglucosamine transferase OGT
Tai6.6488	1.00446	1.11694	0.850684	0.714663	0.642909	Biological Process:protein peptidyl-prolyl isomerization (GO:0000413),Molecular Function:peptidyl-prolyl cis-trans isomerase activity (GO:0003755),Biological Process:protein folding (GO:0006457)	peptidyl-prolyl cis-trans isomerase-like 1	Peptidyl-prolyl cis-trans isomerase (rotamase) - cyclophilin family	135.747	109.344	142.737	148.754	147.364	PREDICTED: peptidyl-prolyl cis-trans isomerase CYP18-2 [Nelumbo nucifera]	PREDICTED: Nicotiana sylvestris peptidyl-prolyl cis-trans isomerase CYP18-2 (LOC104247371), mRNA	peptidyl-prolyl cis-trans isomerase-like 1	Peptidyl-prolyl cis-trans isomerase CYP18-2 OS=Arabidopsis thaliana GN=CYP18-2 PE=2 SV=1	Cyclophilin type peptidyl-prolyl cis-trans isomerase/CLD	protein peptidyl-prolyl isomerization//protein folding	peptidyl-prolyl cis-trans isomerase activity	Cyclophilin type peptidyl-prolyl cis-trans isomerase
Tai6.6475	0.913343	0.581434	0.640232	0.545435	0.633028	--	pyridoxine 4-dehydrogenase	Predicted oxidoreductase (related to aryl-alcohol dehydrogenase)	179.933	17.9615	64.2206	23.7307	72.5021	unnamed protein product [Coffea canephora]	PREDICTED: Solanum lycopersicum auxin-induced protein PCNT115-like (LOC101250055), transcript variant X1, mRNA	--	Probable aldo-keto reductase 2 OS=Oryza sativa subsp. japonica GN=Os04g0338000 PE=2 SV=2	--	--	--	Voltage-gated shaker-like K+ channel, subunit beta/KCNAB
Tai6.6464	0.976272	0.800457	0.510577	0	0	--	phenylalanine ammonia-lyase	Histidine ammonia-lyase	172.495	34.2742	50.3466	10.635	13.2181	phenylalanine ammonia-lyase [Ipomoea nil]	Salvia miltiorrhiza phenylalanine ammonia-lyase 3 (PAL3) mRNA, complete cds	phenylalanine ammonia-lyase	Phenylalanine ammonia-lyase OS=Nicotiana tabacum GN=PALA PE=2 SV=2	--	--	--	Phenylalanine and histidine ammonia-lyase
Tai6.6462	0.885205	1.25775	1.08864	1.43218	1.27813	Molecular Function:adenosine kinase activity (GO:0004001),Biological Process:purine ribonucleoside salvage (GO:0006166)	adenosine kinase	Sugar or nucleoside kinase, ribokinase family	145.748	145.074	166.956	78.9391	90.8824	Adenosine kinase 2 [Theobroma cacao]>gi|508726787|gb|EOY18684.1| Adenosine kinase 2 [Theobroma cacao]	Solanum tuberosum adenosine kinase isoform 1T-like protein (LOC102577684), mRNA >gnl|BL_ORD_ID|776345 Solanum tuberosum clone 186A01 adenosine kinase isoform 1T-like protein mRNA, complete cds	adenosine kinase	Adenosine kinase 1 OS=Arabidopsis thaliana GN=ADK1 PE=1 SV=1	--	--	--	Possible pfkB family carbohydrate kinase
Tai6.6460	1.13733	0.9549	0.904354	1.35299	1.17453	Molecular Function:nucleic acid binding (GO:0003676)	nucleolin	RNA recognition motif (RRM) domain	282.811	295.153	724.575	655.122	496.544	PREDICTED: 29 kDa ribonucleoprotein A, chloroplastic [Jatropha curcas]>gi|643717678|gb|KDP29121.1| hypothetical protein JCGZ_16510 [Jatropha curcas]	Theobroma cacao RNA-binding family protein isoform 2 (TCM_022172) mRNA, complete cds	nucleolin	RNA-binding protein CP29B, chloroplastic OS=Arabidopsis thaliana GN=CP29B PE=1 SV=1	RNA recognition motif//RNA recognition motif. (a.k.a. RRM, RBD, or RNP domain)//Domain of unknown function (DUF3403)	phosphorylation//serine family amino acid metabolic process	nucleic acid binding//protein serine/threonine kinase activity	--
Tai6.6456	1.10781	0.488795	0.382519	0.261709	0.266476	Molecular Function:transporter activity (GO:0005215),Biological Process:transport (GO:0006810),Cellular Component:membrane (GO:0016020)	aquaporin PIP	Glycerol uptake facilitator and related aquaporins (Major Intrinsic Protein Family)	1078.62	46.7954	13.0599	0.303333	2.08368	TPA_exp: aquaporin PIP2 2 [Nicotiana tabacum]	PREDICTED: Nicotiana tomentosiformis aquaporin PIP2-1-like (LOC104107754), mRNA	aquaporin PIP	Aquaporin PIP2-1 OS=Zea mays GN=PIP2-1 PE=1 SV=2	Major intrinsic protein	transport	transporter activity	--
Tai6.6405	0.951103	0.971876	0.633749	0	0	Molecular Function:protein binding (GO:0005515),Molecular Function:zinc ion binding (GO:0008270)	next to BRCA1 gene 1 protein	--	112.517	58.9142	61.4964	51.022	54.6759	PREDICTED: uncharacterized protein LOC102582603 [Solanum tuberosum]	Citrus clementina hypothetical protein (CICLE_v10024152mg) mRNA, complete cds	next to BRCA1 gene 1 protein	Next to BRCA1 gene 1 protein OS=Pongo abelii GN=NBR1 PE=2 SV=1	Zinc finger, ZZ type//PB1 domain	--	protein binding//zinc ion binding	Uncharacterized conserved protein
Tai6.6403	0.962585	1.27173	1.12589	1.00034	1.0538	Molecular Function:protein binding (GO:0005515)	leucine-rich repeat protein SHOC2	Leucine-rich repeat (LRR) protein	13.4057	19.9732	17.4873	16.3205	15.3415	PREDICTED: plant intracellular Ras-group-related LRR protein 9-like [Nicotiana sylvestris]	PREDICTED: Nicotiana tomentosiformis plant intracellular Ras-group-related LRR protein 9-like (LOC104104244), mRNA	--	Plant intracellular Ras-group-related LRR protein 3 OS=Oryza sativa subsp. japonica GN=IRL3 PE=2 SV=3	Hs1pro-1 N-terminus//Leucine rich repeat//Leucine Rich Repeat	defense response	protein binding	--
Tai6.6398	1.02854	0.919442	1.02464	1.06394	0.962614	Biological Process:protein folding (GO:0006457),Cellular Component:prefoldin complex (GO:0016272),Molecular Function:unfolded protein binding (GO:0051082)	prefoldin subunit 2	--	49.2439	46.8057	51.8829	42.7798	37.0752	hypothetical protein PHAVU_008G161600g [Phaseolus vulgaris]>gi|593488331|ref|XP_007141033.1| hypothetical protein PHAVU_008G161600g [Phaseolus vulgaris]>gi|561014165|gb|ESW13026.1| hypothetical protein PHAVU_008G161600g [Phaseolus vulgaris]>gi|561014166|gb|ESW13027.1| hypothetical protein PHAVU_008G161600g [Phaseolus vulgaris]	--	prefoldin subunit 2	Probable prefoldin subunit 2 OS=Arabidopsis thaliana GN=At3g22480 PE=2 SV=1	Vacuolar sorting 38 and autophagy-related subunit 14//Prefoldin subunit//GatB domain	positive regulation of autophagy//protein folding	carbon-nitrogen ligase activity, with glutamine as amido-N-donor//unfolded protein binding	Molecular chaperone Prefoldin, subunit 2
Tai6.6396	0.961447	0.851423	1.0028	1.51114	1.42665	Molecular Function:single-stranded DNA binding (GO:0003697)	single-strand DNA-binding protein	Single-stranded DNA-binding protein	2.76944	2.93195	3.0397	3.09395	2.0862	PREDICTED: single-stranded DNA-binding protein, mitochondrial [Nicotiana sylvestris]	PREDICTED: Citrus sinensis single-stranded DNA-binding protein, mitochondrial-like (LOC102620340), mRNA	single-strand DNA-binding protein	Single-stranded DNA-binding protein, mitochondrial OS=Arabidopsis thaliana GN=At4g11060 PE=2 SV=1	Single-strand binding protein family	--	single-stranded DNA binding	--
Tai6.6371	1.10044	0.620088	0.480341	0.298564	0.760393	Molecular Function:catalytic activity (GO:0003824),Biological Process:metabolic process (GO:0008152)	4-coumarate--CoA ligase	Acyl-CoA synthetase (AMP-forming)/AMP-acid ligase II	44.0597	7.70238	19.3855	13.8329	11.4293	4-coumarate:CoA ligase [Petunia x hybrida]	Ipomoea purpurea genotype GZKLP1b 4-coumarate-CoA ligase (4CL) mRNA, 4CL-fl2 allele, complete cds	4-coumarate--CoA ligase	4-coumarate--CoA ligase 2 OS=Nicotiana tabacum GN=4CL2 PE=2 SV=1	Uncharacterised protein family (UPF0121)//AMP-binding enzyme	metabolic process	catalytic activity	--
Tai6.6354	0.333333	0	0.398656	1.15939	1.09518	--	polycystin 1L3	--	18.181	19.3902	18.2044	13.2456	13.908	PREDICTED: coiled-coil domain-containing protein 25-like [Solanum tuberosum]	PREDICTED: Nelumbo nucifera coiled-coil domain-containing protein 25-like (LOC104595180), mRNA	--	Coiled-coil domain-containing protein 25 OS=Danio rerio GN=ccdc25 PE=1 SV=1	--	--	--	Predicted coiled-coil protein
Tai6.6293	1.12029	1.02345	0.870913	0.639605	0.754679	Cellular Component:nucleosome (GO:0000786),Molecular Function:DNA binding (GO:0003677)	histone H3	--	0.187094	0.235714	0.181961	0.453112	0.0664316	hypothetical protein B456_010G171000 [Gossypium raimondii]	PREDICTED: Pyrus x bretschneideri histone H3.2 (LOC103954627), mRNA	histone H3	Histone H3.2 OS=Pisum sativum PE=1 SV=2	Core histone H2A/H2B/H3/H4	--	DNA binding	Histones H3 and H4
Tai6.6280	1.27751	0.807316	0.438032	0	0	--	proteasome inhibitor subunit 1 (PI31)	--	0	0.0582385	0.1071	0.0979821	0	PREDICTED: probable proteasome inhibitor [Nicotiana sylvestris]	PREDICTED: Nicotiana tomentosiformis probable proteasome inhibitor (LOC104085431), partial mRNA	proteasome inhibitor subunit 1 (PI31)	Probable proteasome inhibitor OS=Arabidopsis thaliana GN=At3g53970 PE=1 SV=1	--	--	--	--
Tai6.6278	0.93814	1.33964	0.87431	0	0	--	serine/threonine-protein kinase ULK/ATG1	--	34.7469	25.8143	25.971	25.9568	26.4943	PREDICTED: serine/threonine-protein kinase ATG1 [Nicotiana tomentosiformis]	PREDICTED: Nicotiana tomentosiformis serine/threonine-protein kinase ATG1 (LOC104112308), mRNA	serine/threonine-protein kinase ULK/ATG1	--	Domain of unknown function (DUF3543)	phosphorylation//serine family amino acid metabolic process	protein serine/threonine kinase activity	--
Tai6.6277	0.333333	0	0.306284	0.730328	0.81612	Molecular Function:protein kinase activity (GO:0004672),Molecular Function:ATP binding (GO:0005524),Biological Process:protein phosphorylation (GO:0006468)	serine/threonine-protein kinase ULK/ATG1	Serine/threonine protein kinase	21.1682	13.8489	16.5823	15.5868	19.9273	PREDICTED: serine/threonine-protein kinase ATG1 [Nicotiana tomentosiformis]	PREDICTED: Solanum tuberosum serine/threonine-protein kinase ATG1-like (LOC102588179), mRNA	serine/threonine-protein kinase ULK/ATG1	Serine/threonine-protein kinase apg-1 OS=Neurospora crassa (strain ATCC 24698 / 74-OR23-1A / CBS 708.71 / DSM 1257 / FGSC 987) GN=apg-1 PE=3 SV=2	Poxvirus serine/threonine protein kinase//Protein kinase domain//Lipopolysaccharide kinase (Kdo/WaaP) family//Protein tyrosine kinase	protein phosphorylation	phosphotransferase activity, alcohol group as acceptor//protein kinase activity//ATP binding	Serine/threonine-protein kinase involved in autophagy
Tai6.6274	1.07381	1.02764	0.879245	0.945116	0.91845	Molecular Function:DNA binding (GO:0003677),Molecular Function:DNA-directed 5'-3' RNA polymerase activity (GO:0003899),Molecular Function:ribonucleoside binding (GO:0032549)	DNA-directed RNA polymerase IV and V subunit 2	DNA-directed RNA polymerase, beta subunit/140 kD subunit	31.0465	37.526	36.4683	44.23	44.3243	hypothetical protein M569_01229, partial [Genlisea aurea]	PREDICTED: Jatropha curcas DNA-directed RNA polymerases IV and V subunit 2-like (LOC105637554), transcript variant X2, mRNA	DNA-directed RNA polymerase IV and V subunit 2	DNA-directed RNA polymerases IV and V subunit 2 OS=Arabidopsis thaliana GN=NRPD2 PE=1 SV=1	RNA polymerase Rpb2, domain 6//ClpX C4-type zinc finger//RNA polymerase Rpb2, domain 7	transcription, DNA-templated//purine nucleobase metabolic process//pyrimidine nucleobase metabolic process	DNA binding//DNA-directed RNA polymerase activity//protein dimerization activity//zinc ion binding	RNA polymerase II, second largest subunit
Tai6.627	1.02913	1.05115	0.854165	0.461464	0.534071	Molecular Function:magnesium ion binding (GO:0000287),Molecular Function:pyruvate kinase activity (GO:0004743),Biological Process:glycolytic process (GO:0006096),Molecular Function:potassium ion binding (GO:0030955)	pyruvate kinase	Pyruvate kinase	24.7054	54.8664	80.5301	43.8141	47.2505	PREDICTED: pyruvate kinase isozyme A, chloroplastic isoform X1 [Nelumbo nucifera]>gi|720075425|ref|XP_010279308.1| PREDICTED: pyruvate kinase isozyme A, chloroplastic isoform X2 [Nelumbo nucifera]	PREDICTED: Citrus sinensis pyruvate kinase isozyme A, chloroplastic-like (LOC102612172), mRNA	pyruvate kinase	Pyruvate kinase isozyme A, chloroplastic OS=Ricinus communis PE=1 SV=1	Pyruvate kinase, barrel domain//DnaB-like helicase C terminal domain//HpcH/HpaI aldolase/citrate lyase family	glycolytic process//DNA replication//purine nucleobase metabolic process//carbon utilization//gluconeogenesis	pyruvate kinase activity//DNA helicase activity//potassium ion binding//catalytic activity//ATP binding//magnesium ion binding	Pyruvate kinase
Tai6.6263	0.917882	1.93787	1.80505	0.969337	0.997033	--	receptor expression-enhancing protein 5/6	--	16.3776	16.3985	16.991	14.0718	15.9728	PREDICTED: HVA22-like protein a [Nicotiana tomentosiformis]>gi|698555647|ref|XP_009770547.1| PREDICTED: HVA22-like protein a [Nicotiana sylvestris]	--	receptor expression-enhancing protein 5/6	HVA22-like protein a OS=Arabidopsis thaliana GN=HVA22A PE=2 SV=1	Surp module	RNA processing	RNA binding	Protein involved in membrane traffic (YOP1/TB2/DP1/HVA22 family)
Tai6.6259	1.04893	1.47234	1.5407	1.16216	1.10435	Molecular Function:oxidoreductase activity (GO:0016491),Biological Process:oxidation-reduction process (GO:0055114)	malate dehydrogenase	Malate/lactate dehydrogenase	98.7267	130.787	123.098	78.2451	106.486	PREDICTED: malate dehydrogenase, chloroplastic isoform X1 [Nicotiana sylvestris]	PREDICTED: Solanum tuberosum malate dehydrogenase, chloroplastic-like (LOC102598930), mRNA	malate dehydrogenase	Malate dehydrogenase, chloroplastic OS=Arabidopsis thaliana GN=At3g47520 PE=1 SV=1	lactate/malate dehydrogenase, alpha/beta C-terminal domain//Glu/Leu/Phe/Val dehydrogenase, dimerisation domain//lactate/malate dehydrogenase, NAD binding domain	cellular amino acid metabolic process//oxidation-reduction process	oxidoreductase activity, acting on the CH-OH group of donors, NAD or NADP as acceptor//oxidoreductase activity	NAD-dependent malate dehydrogenase
Tai6.6255	0.333333	0	0.277196	0.882199	0.834206	Molecular Function:nucleic acid binding (GO:0003676),Molecular Function:endonuclease activity (GO:0004519)	--	--	24.9426	18.6122	17.4383	13.1442	14.5906	unnamed protein product [Coffea canephora]	PREDICTED: Erythranthe guttatus uncharacterized LOC105972621 (LOC105972621), mRNA	--	--	HNH endonuclease	--	endonuclease activity//nucleic acid binding	--
Tai6.6238	1.1519	0.897436	0.83541	0.586029	0.589623	Cellular Component:spliceosomal complex (GO:0005681)	intron-binding protein aquarius	--	2.23261	3.64313	3.23912	3.94195	4.51657	PREDICTED: intron-binding protein aquarius [Sesamum indicum]	--	intron-binding protein aquarius	Intron-binding protein aquarius OS=Mus musculus GN=Aqr PE=2 SV=2	--	--	--	DEAD box containing helicases
Tai6.6235	1.00912	0.968394	0.955331	0.973176	0.984625	Biological Process:intracellular protein transport (GO:0006886),Biological Process:vesicle-mediated transport (GO:0016192),Cellular Component:membrane coat (GO:0030117),Cellular Component:clathrin adaptor complex (GO:0030131)	AP-2 complex subunit alpha	--	0.240335	0.322198	0.289516	0.243823	0.285785	PREDICTED: AP-2 complex subunit alpha-1-like isoform X1 [Nicotiana sylvestris]	PREDICTED: Nicotiana sylvestris AP-2 complex subunit alpha-1-like (LOC104245312), transcript variant X1, mRNA	AP-2 complex subunit alpha	AP-2 complex subunit alpha-1 OS=Arabidopsis thaliana GN=ALPHA-ADR PE=1 SV=1	Adaptin N terminal region//Adaptin C-terminal domain//Alpha adaptin AP2, C-terminal domain//HEAT repeat	intracellular protein transport//vesicle-mediated transport	protein binding	Vesicle coat complex AP-2, alpha subunit
Tai6.623	0.987018	1.34087	1.46345	1.41514	1.29156	Molecular Function:oxidoreductase activity (GO:0016491),Biological Process:cell redox homeostasis (GO:0045454),Biological Process:oxidation-reduction process (GO:0055114)	glutathione reductase (NADPH)	Pyruvate/2-oxoglutarate dehydrogenase complex, dihydrolipoamide dehydrogenase (E3) component or related enzyme	0.438978	0.363174	0.399514	0.631064	0.382144	RecName: Full=Glutathione reductase, chloroplastic; Short=GR; Short=GRase; Flags: Precursor, partial [Nicotiana tabacum]>gi|431955|emb|CAA53925.1| glutathione reductase (NADPH) [Nicotiana tabacum]	PREDICTED: Nicotiana tomentosiformis glutathione reductase, chloroplastic (LOC104098100), transcript variant X2, mRNA	glutathione reductase (NADPH)	Glutathione reductase, chloroplastic (Fragment) OS=Nicotiana tabacum GN=GOR PE=1 SV=1	D-isomer specific 2-hydroxyacid dehydrogenase, NAD binding domain//Pyridine nucleotide-disulphide oxidoreductase, dimerisation domain//Pyridine nucleotide-disulphide oxidoreductase//Pyridine nucleotide-disulphide oxidoreductase	oxidation-reduction process//cell redox homeostasis	oxidoreductase activity//NAD binding	Pyridine nucleotide-disulphide oxidoreductase
Tai6.6220	0.333333	0	0.418712	1.59714	1.7408	Molecular Function:electron carrier activity (GO:0009055)	electron transfer flavoprotein beta subunit	Electron transfer flavoprotein, alpha and beta subunits	16.0046	9.60445	11.7051	9.72471	10.6917	unknown [Lotus japonicus]	PREDICTED: Nicotiana tomentosiformis electron transfer flavoprotein subunit beta, mitochondrial (LOC104093497), mRNA	electron transfer flavoprotein beta subunit	Electron transfer flavoprotein subunit beta, mitochondrial OS=Arabidopsis thaliana GN=ETFB PE=1 SV=1	--	--	--	Electron transfer flavoprotein, beta subunit
Tai6.6209	1.06044	1.64063	1.82158	2.15073	2.02457	--	--	--	15.7194	31.5384	30.9115	43.5112	39.0533	PREDICTED: outer envelope pore protein 21, chloroplastic [Vitis vinifera]>gi|297745586|emb|CBI40751.3| unnamed protein product [Vitis vinifera]	--	--	Outer envelope pore protein 21B, chloroplastic OS=Arabidopsis thaliana GN=OEP21B PE=2 SV=1	--	--	--	--
Tai6.6201	1.10431	0.458735	0.270747	0	0	Molecular Function:protein binding (GO:0005515)	LRR receptor-like serine/threonine-protein kinase FLS2	Leucine-rich repeat (LRR) protein	13.9964	24.1143	20.3702	32.4942	20.8934	PREDICTED: LRR receptor-like serine/threonine-protein kinase FLS2 [Nicotiana tomentosiformis]	PREDICTED: Sesamum indicum probable LRR receptor-like serine/threonine-protein kinase At4g36180 (LOC105169511), mRNA	--	LRR receptor-like serine/threonine-protein kinase GSO1 OS=Arabidopsis thaliana GN=GSO1 PE=2 SV=1	Leucine Rich Repeat//Leucine rich repeat	--	protein binding	--
Tai6.620	0.885116	1.37691	2.26542	0	0	--	MFS transporter, PHS family, inorganic phosphate transporter	--	0.0470963	0.0501364	0	0.043502	0.0475957	PREDICTED: uncharacterized protein LOC104211437 [Nicotiana sylvestris]	Solanum lycopersicum cDNA, clone: LEFL1029DA04, HTC in leaf	--	--	Prominin//CorA-like Mg2+ transporter protein//Baculovirus polyhedron envelope protein, PEP, C terminus//Aphid transmission protein//Apolipoprotein A1/A4/E domain//Fibrinogen alpha/beta chain family//Intermediate filament protein	signal transduction//lipid transport//lipoprotein metabolic process//transmission of virus//protein polymerization//transmembrane transport//platelet activation//metal ion transport	lipid binding//protein binding, bridging//metal ion transmembrane transporter activity//structural molecule activity//receptor binding	--
Tai6.6169	1.12641	0.624531	0.557287	0	0	Molecular Function:chitinase activity (GO:0004568),Biological Process:chitin catabolic process (GO:0006032),Molecular Function:chitin binding (GO:0008061),Biological Process:cell wall macromolecule catabolic process (GO:0016998)	chitinase	Chitodextrinase	14.8329	2.2976	0.700917	0.362188	1.84592	PREDICTED: endochitinase PR4-like [Nicotiana sylvestris]	Theobroma cacao Carrot EP3-3 chitinase (TCM_019913) mRNA, complete cds	chitinase	Chitinase 6 OS=Oryza sativa subsp. japonica GN=Cht6 PE=2 SV=1	Pyrimidine nucleoside phosphorylase C-terminal domain//Chitin recognition protein//Chitinase class I	cell wall macromolecule catabolic process//pyrimidine nucleoside metabolic process//chitin catabolic process	chitinase activity//chitin binding//transferase activity, transferring pentosyl groups	--
Tai6.6165	0.574428	0.230007	0.425372	0.915339	1.12085	--	--	Outer membrane protein assembly factor BamB, contains PQQ-like beta-propeller repeat	43.0597	44.6053	43.0782	48.0684	45.4015	PREDICTED: LOW QUALITY PROTEIN: uncharacterized protein LOC105174535 [Sesamum indicum]	PREDICTED: Nicotiana sylvestris uncharacterized LOC104235475 (LOC104235475), transcript variant X2, mRNA	--	Protein DEFECTIVE IN EXINE FORMATION 1 OS=Arabidopsis thaliana GN=DEX1 PE=2 SV=1	IucA / IucC family//Ubiquinol-cytochrome C reductase complex, 6.4kD protein	iron ion transport//oxidative phosphorylation//obsolete electron transport//proton transport//siderophore biosynthetic process	electron carrier activity//ubiquinol-cytochrome-c reductase activity//siderophore transmembrane transporter activity	--
Tai6.6163	0.333333	0	0.36118	1.40067	1.22984	Molecular Function:oxidoreductase activity (GO:0016491),Biological Process:oxidation-reduction process (GO:0055114)	--	Glycine/D-amino acid oxidase (deaminating)	10.541	1.38134	1.62321	3.06447	1.97589	PREDICTED: probable sarcosine oxidase-like [Solanum tuberosum]	PREDICTED: Prunus mume probable sarcosine oxidase (LOC103320108), mRNA	sarcosine oxidase / L-pipecolate oxidase	Probable sarcosine oxidase OS=Arabidopsis thaliana GN=At2g24580 PE=2 SV=1	Flavin containing amine oxidoreductase//FAD dependent oxidoreductase//Glucose inhibited division protein A//Pyridine nucleotide-disulphide oxidoreductase//FAD dependent oxidoreductase//FAD binding domain//3-hydroxyacyl-CoA dehydrogenase, NAD binding domain	tryptophan metabolic process//fatty acid biosynthetic process//fatty acid metabolic process//lysine catabolic process//oxidation-reduction process//leucine catabolic process//tRNA processing//valine catabolic process//isoleucine catabolic process//benzoate metabolic process	oxidoreductase activity//flavin adenine dinucleotide binding//FAD binding//3-hydroxyacyl-CoA dehydrogenase activity	FAD-dependent oxidoreductase
Tai6.6159	0.333333	0	0.422303	1.06844	1.39614	Biological Process:tail-anchored membrane protein insertion into ER membrane (GO:0071816)	--	--	25.8168	20.7701	20.8196	20.5177	20.4094	PREDICTED: uncharacterized protein LOC104093253 [Nicotiana tomentosiformis]	Theobroma cacao Uncharacterized protein isoform 1 (TCM_000069) mRNA, complete cds	--	--	Adenoviral protein L1 52/55-kDa//Anti-repressor SinI//Microtubule-associated protein 70//CHD5-like protein//Septum formation initiator	tail-anchored membrane protein insertion into ER membrane//cell cycle//cytoskeleton organization//regulation of transcription, DNA-templated//virion assembly	microtubule binding//protein dimerization activity	--
Tai6.6155	1.10406	1.06521	0.94386	1.21971	1.12873	Molecular Function:phosphoric ester hydrolase activity (GO:0042578),Molecular Function:phosphatidylinositol phosphate phosphatase activity (GO:0052866)	phosphatidylinositol-bisphosphatase	--	0	0	0	0	0.148451	PREDICTED: phosphoinositide phosphatase SAC6-like [Solanum tuberosum]	PREDICTED: Erythranthe guttatus phosphoinositide phosphatase SAC7-like (LOC105965788), mRNA	--	Phosphoinositide phosphatase SAC6 OS=Arabidopsis thaliana GN=SAC6 PE=2 SV=1	--	--	--	Putative phosphoinositide phosphatase
Tai6.6144	0.932882	0.861816	0.789622	0.752679	0.841512	Molecular Function:ADP binding (GO:0043531)	disease resistance protein RPM1	Predicted ATPase	2.82243	7.02015	3.68115	6.57485	3.10082	PREDICTED: putative late blight resistance protein homolog R1B-16 isoform X1 [Nicotiana sylvestris]>gi|698531740|ref|XP_009762698.1| PREDICTED: putative late blight resistance protein homolog R1B-16 isoform X1 [Nicotiana sylvestris]>gi|698531742|ref|XP_009762699.1| PREDICTED: putative late blight resistance protein homolog R1B-16 isoform X2 [Nicotiana sylvestris]	--	--	Putative late blight resistance protein homolog R1B-17 OS=Solanum demissum GN=R1B-17 PE=3 SV=1	ABC transporter//TIP49 C-terminus//Pumilio-family RNA binding repeat//Primase C terminal 2 (PriCT-2)//Threonylcarbamoyl adenosine biosynthesis protein TsaE//ATPase family associated with various cellular activities (AAA)//Protein of unknown function, DUF258//NB-ARC domain	tRNA threonylcarbamoyladenosine modification	RNA binding//GTPase activity//hydrolase activity, acting on acid anhydrides//ATPase activity//DNA helicase activity//ADP binding//ATP binding//GTP binding	--
Tai6.6142	1.09198	1.01037	1.02821	1.17505	1.04522	--	transforming growth factor-beta-induced protein	Uncaracterized surface protein containing fasciclin (FAS1) repeats	19.1627	67.9118	41.4841	22.8674	27.0319	PREDICTED: fasciclin-like arabinogalactan protein 7 [Nicotiana sylvestris]>gi|698515721|ref|XP_009802738.1| PREDICTED: fasciclin-like arabinogalactan protein 7 [Nicotiana sylvestris]	Lotus japonicus clone JCVI-FLLj-2M18 unknown mRNA	--	Fasciclin-like arabinogalactan protein 7 OS=Arabidopsis thaliana GN=FLA7 PE=1 SV=1	DEC-1 protein, N-terminal region	chorion-containing eggshell formation	structural constituent of chorion	--
Tai6.614	0.894587	1.05097	0.924795	1.26333	1.32153	--	ESCRT-II complex subunit VPS25	--	11.0714	13.5077	13.8096	11.1976	9.3898	PREDICTED: vacuolar protein sorting-associated protein 25 [Nicotiana tomentosiformis]>gi|697173762|ref|XP_009595809.1| PREDICTED: vacuolar protein sorting-associated protein 25 [Nicotiana tomentosiformis]>gi|697173764|ref|XP_009595810.1| PREDICTED: vacuolar protein sorting-associated protein 25 [Nicotiana tomentosiformis]>gi|697173766|ref|XP_009595811.1| PREDICTED: vacuolar protein sorting-associ…	PREDICTED: Nicotiana tomentosiformis vacuolar protein sorting-associated protein 25 (LOC104092033), transcript variant X6, mRNA	ESCRT-II complex subunit VPS25	Vacuolar protein sorting-associated protein 25 OS=Arabidopsis thaliana GN=VPS25 PE=1 SV=1	--	--	--	Uncharacterized conserved protein
Tai6.6139	1.0106	0.935453	0.9994	1.29802	1.35435	Molecular Function:nucleic acid binding (GO:0003676)	RNA-binding protein Musashi	RNA recognition motif (RRM) domain	0	0	0	0.0419006	0	PREDICTED: heterogeneous nuclear ribonucleoprotein 1-like isoform X1 [Solanum tuberosum]>gi|565394770|ref|XP_006363029.1| PREDICTED: heterogeneous nuclear ribonucleoprotein 1-like isoform X2 [Solanum tuberosum]>gi|565394772|ref|XP_006363030.1| PREDICTED: heterogeneous nuclear ribonucleoprotein 1-like isoform X3 [Solanum tuberosum]	Phaseolus vulgaris hypothetical protein (PHAVU_008G286500g) mRNA, complete cds	RNA-binding protein Musashi	Heterogeneous nuclear ribonucleoprotein 1 OS=Arabidopsis thaliana GN=RNP1 PE=1 SV=1	RNA recognition motif//Spc97 / Spc98 family//RNA recognition motif. (a.k.a. RRM, RBD, or RNP domain)	positive regulation of microtubule nucleation//microtubule cytoskeleton organization	nucleic acid binding	--
Tai6.6134	0.912991	0.27279	0.310747	0.246066	0.276325	Cellular Component:membrane (GO:0016020)	light-harvesting complex II chlorophyll a/b binding protein 2	--	33.9077	16.8378	24.8494	0.524704	0.847322	PREDICTED: chlorophyll a-b binding protein 5, chloroplastic [Sesamum indicum]	PREDICTED: Oryza brachyantha chlorophyll a-b binding protein, chloroplastic-like (LOC102722455), mRNA	light-harvesting complex II chlorophyll a/b binding protein 2	Chlorophyll a-b binding protein, chloroplastic OS=Oryza sativa subsp. japonica GN=RCABP89 PE=2 SV=1	--	--	--	--
Tai6.6132	1.00867	0.522784	0.44948	0	0	--	mitochondrial import inner membrane translocase subunit TIM44	Predicted lipid-binding transport protein, Tim44 family	9.70073	9.01149	7.56739	5.86694	6.55869	PREDICTED: mitochondrial import inner membrane translocase subunit TIM44-2-like [Solanum tuberosum]	PREDICTED: Sesamum indicum mitochondrial import inner membrane translocase subunit TIM44-2-like (LOC105169842), transcript variant X1, mRNA	mitochondrial import inner membrane translocase subunit TIM44	Mitochondrial import inner membrane translocase subunit TIM44-2 OS=Arabidopsis thaliana GN=TIM44-2 PE=1 SV=1	Apolipoprotein A1/A4/E domain//Protein of unknown function (DUF904)//V-type ATPase 116kDa subunit family//Exonuclease VII, large subunit	ATP hydrolysis coupled proton transport//barrier septum assembly//lipid transport//DNA catabolic process//proton transport//FtsZ-dependent cytokinesis//lipoprotein metabolic process	exodeoxyribonuclease VII activity//lipid binding//hydrogen ion transmembrane transporter activity	Mitochondrial import inner membrane translocase, subunit TIM44
Tai6.6126	1.07883	0.769494	0.683837	0.56207	0.634022	Molecular Function:DNA binding (GO:0003677)	SWI/SNF chromatin-remodeling complex subunit SWI1	--	18.3367	21.3639	15.2168	12.9161	13.3584	PREDICTED: peroxisomal 2,4-dienoyl-CoA reductase [Nicotiana sylvestris]	PREDICTED: Solanum lycopersicum short-chain dehydrogenase reductase 3a (LOC101255117), transcript variant X3, mRNA	--	3-oxoacyl-[acyl-carrier-protein] reductase FabG OS=Bacillus subtilis (strain 168) GN=fabG PE=3 SV=3	short chain dehydrogenase	metabolic process	oxidoreductase activity	--
Tai6.6116	1.12794	1.58486	1.08419	0.839652	0.617694	Molecular Function:protein binding (GO:0005515),Molecular Function:zinc ion binding (GO:0008270),Molecular Function:histone binding (GO:0042393)	nucleosome-remodeling factor subunit BPTF	--	76.547	60.4475	52.1506	58.5899	49.5447	PREDICTED: PHD finger protein Alfin1-like [Nicotiana tomentosiformis]	PREDICTED: Nicotiana tomentosiformis PHD finger protein Alfin1-like (LOC104116865), mRNA	--	PHD finger protein ALFIN-LIKE 7 OS=Arabidopsis thaliana GN=AL7 PE=1 SV=1	RNA polymerase III RPC4//Presenilin//Phorbol esters/diacylglycerol binding domain (C1 domain)//Domain of unknown function (DUF3594)//PHD-finger	intracellular signal transduction//purine nucleobase metabolic process//transcription from RNA polymerase III promoter//transcription, DNA-templated//regulation of transcription, DNA-templated//pyrimidine nucleobase metabolic process	DNA-directed RNA polymerase activity//DNA binding//histone binding//protein binding//aspartic-type endopeptidase activity	--
Tai6.611	1.1418	1.3512	0.614996	0	0	Molecular Function:protein binding (GO:0005515)	26S proteasome regulatory subunit N9	--	58.9801	56.517	68.6602	45.3084	44.8785	PREDICTED: 26S proteasome non-ATPase regulatory subunit 13 homolog B-like [Solanum tuberosum]	PREDICTED: Solanum lycopersicum 26S proteasome non-ATPase regulatory subunit 13 homolog B (LOC101245654), mRNA	26S proteasome regulatory subunit N9	26S proteasome non-ATPase regulatory subunit 13 OS=Dictyostelium discoideum GN=psmD13 PE=2 SV=1	PCI domain	--	protein binding	26S proteasome regulatory complex, subunit RPN9/PSMD13
Tai6.6080	1.0625	1.14853	1.20589	1.10096	1.06908	Molecular Function:protein binding (GO:0005515)	chloride intracellular channel protein 1	Glutathione S-transferase	97.7316	121.748	138.806	142.497	142.606	glutathione S-transferase DHAR2-like [Sesamum indicum]>gi|82698815|gb|ABB89210.1| dehydroascorbate reductase [Sesamum indicum]	Ipomoea batatas dehydroascorbate reductase mRNA, complete cds	--	Glutathione S-transferase DHAR2 OS=Arabidopsis thaliana GN=DHAR2 PE=1 SV=1	Glutathione S-transferase, N-terminal domain//Glutathione S-transferase, N-terminal domain//Glutathione S-transferase, N-terminal domain//Glutaredoxin	obsolete electron transport//cell redox homeostasis	electron carrier activity//protein disulfide oxidoreductase activity//protein binding	--
Tai6.6059	0.818766	0.60647	0.288346	0	0	--	--	--	26.4899	26.4819	27.6714	26.8665	27.2526	PREDICTED: uncharacterized protein LOC104212898 isoform X2 [Nicotiana sylvestris]	PREDICTED: Solanum lycopersicum uncharacterized LOC101265479 (LOC101265479), transcript variant X2, mRNA	--	--	--	--	--	--
Tai6.6045	0.890574	0.904252	0.584002	0	0	--	putative hydrolases of HD superfamily	5'-deoxynucleotidase YfbR and related HD superfamily hydrolases	13.7882	20.5665	24.1534	23.0007	20.4481	PREDICTED: HD domain-containing protein 2 [Nicotiana tomentosiformis]	PREDICTED: Nicotiana tomentosiformis HD domain-containing protein 2 (LOC104103450), mRNA	putative hydrolases of HD superfamily	HD domain-containing protein 2 OS=Mus musculus GN=Hddc2 PE=2 SV=1	--	--	--	Predicted hydrolases of HD superfamily
Tai6.6038	1.01546	1.24495	1.24752	1.1979	1.12458	--	NADH dehydrogenase (ubiquinone) 1 alpha subcomplex subunit 9	Uncharacterized conserved protein YbjT, contains NAD(P)-binding and DUF2867 domains	97.802	90.6475	99.0622	100.61	103.165	PREDICTED: NADH dehydrogenase [ubiquinone] 1 alpha subcomplex subunit 9, mitochondrial [Gossypium raimondii]>gi|763775212|gb|KJB42335.1| hypothetical protein B456_007G150200 [Gossypium raimondii]	PREDICTED: Nicotiana tomentosiformis NADH dehydrogenase [ubiquinone] 1 alpha subcomplex subunit 9, mitochondrial (LOC104084473), transcript variant X5, mRNA	NADH dehydrogenase (ubiquinone) 1 alpha subcomplex subunit 9	NADH dehydrogenase [ubiquinone] 1 alpha subcomplex subunit 9, mitochondrial OS=Arabidopsis thaliana GN=At2g20360 PE=1 SV=2	3-beta hydroxysteroid dehydrogenase/isomerase family//Saccharopine dehydrogenase NADP binding domain//short chain dehydrogenase//NAD dependent epimerase/dehydratase family	steroid biosynthetic process//metabolic process//androgen metabolic process//oxidation-reduction process//estrogen metabolic process//C21-steroid hormone metabolic process	oxidoreductase activity, acting on the CH-OH group of donors, NAD or NADP as acceptor//3-beta-hydroxy-delta5-steroid dehydrogenase activity//catalytic activity//oxidoreductase activity//coenzyme binding	NADH:ubiquinone oxidoreductase, NDUFA9/39kDa subunit
Tai6.6033	0.920271	0.917623	0.515446	0	0	Molecular Function:motor activity (GO:0003774),Molecular Function:ATP binding (GO:0005524),Cellular Component:myosin complex (GO:0016459)	myosin V	--	15.1797	25.2906	17.652	24.5817	23.1263	PREDICTED: myosin-6-like isoform X4 [Solanum lycopersicum]	PREDICTED: Solanum tuberosum myosin-6-like (LOC102581429), mRNA	myosin V	Myosin-6 OS=Arabidopsis thaliana GN=XI-2 PE=1 SV=1	Myosin N-terminal SH3-like domain//Type II/IV secretion system protein//Adenylylsulphate kinase//Threonylcarbamoyl adenosine biosynthesis protein TsaE//Myosin head (motor domain)	sulfate assimilation//transport//purine nucleobase metabolic process//tRNA threonylcarbamoyladenosine modification	ATP binding//motor activity//adenylylsulfate kinase activity	--
Tai6.6029	0.92381	1.5	1.49452	1.75606	1.49545	Biological Process:biosynthetic process (GO:0009058)	anthranilate synthase component I	Anthranilate/para-aminobenzoate synthases component I	22.0953	38.5473	58.2123	66.6699	63.4577	unnamed protein product [Coffea canephora]	PREDICTED: Solanum tuberosum anthranilate synthase component I-2, chloroplastic-like (LOC102595737), mRNA	anthranilate synthase component I	Anthranilate synthase alpha subunit 2, chloroplastic OS=Oryza sativa subsp. japonica GN=OsASA2 PE=1 SV=1	--	--	--	Isochorismate synthase
Tai6.6020	1.09747	0.686036	1.02055	1.39078	1.20793	Molecular Function:glutathione peroxidase activity (GO:0004602),Biological Process:response to oxidative stress (GO:0006979),Biological Process:oxidation-reduction process (GO:0055114)	glutathione peroxidase	Glutathione peroxidase, house-cleaning role in reducing lipid peroxides	14.1165	8.79702	6.64203	6.92754	9.26363	PREDICTED: probable glutathione peroxidase 2 [Nicotiana tomentosiformis]	PREDICTED: Gossypium raimondii probable glutathione peroxidase 2 (LOC105799994), mRNA	glutathione peroxidase	Probable glutathione peroxidase 2 OS=Arabidopsis thaliana GN=GPX2 PE=1 SV=1	AhpC/TSA family//Redoxin//Glutathione peroxidase	oxidation-reduction process//obsolete peroxidase reaction//glutathione metabolic process//response to oxidative stress	glutathione peroxidase activity//oxidoreductase activity//antioxidant activity	--
Tai6.6014	1.04881	0.901092	1.06141	1.13399	0.995643	Molecular Function:oxoglutarate dehydrogenase (succinyl-transferring) activity (GO:0004591),Biological Process:tricarboxylic acid cycle (GO:0006099),Molecular Function:thiamine pyrophosphate binding (GO:0030976),Biological Process:oxidation-reduction process (GO:0055114)	2-oxoglutarate dehydrogenase E1 component	2-oxoglutarate dehydrogenase complex, dehydrogenase (E1) component, and related enzymes	22.9553	23.4182	27.4096	18.6623	18.4672	PREDICTED: 2-oxoglutarate dehydrogenase, mitochondrial-like isoform X1 [Nelumbo nucifera]	--	2-oxoglutarate dehydrogenase E1 component	2-oxoglutarate dehydrogenase, mitochondrial OS=Schizosaccharomyces pombe (strain 972 / ATCC 24843) GN=kgd1 PE=3 SV=1	--	--	--	2-oxoglutarate dehydrogenase, E1 subunit
Tai6.6002	1.14205	0.952428	0.566866	0	0	Biological Process:metabolic process (GO:0008152)	cyanohydrin beta-glucosyltransferase	UDP:flavonoid glycosyltransferase YjiC, YdhE family	0.0235674	0.10889	0.0237273	0	0	PREDICTED: 7-deoxyloganetin glucosyltransferase-like [Nicotiana tomentosiformis]>gi|62241065|dbj|BAD93689.1| glycosyltransferase [Nicotiana tabacum]	Ipomoea batatas IbUGT42 mRNA for UDP-glycosyltransferase 85A32, complete cds	--	7-deoxyloganetin glucosyltransferase OS=Gardenia jasminoides GN=UGT85A24 PE=1 SV=1	UDP-glucoronosyl and UDP-glucosyl transferase	metabolic process	transferase activity, transferring hexosyl groups	--
Tai6.5980	1.15008	0.723223	0.98724	1.36964	1.46325	--	--	--	5.66926	9.09106	6.49212	8.20795	13.7619	uncharacterized protein LOC101250067 isoform 2 [Solanum lycopersicum]	--	--	--	--	--	--	--
Tai6.5973	1.00505	0.767677	0.471942	0	0	Molecular Function:iron ion binding (GO:0005506),Molecular Function:oxidoreductase activity (GO:0016491),Molecular Function:L-ascorbic acid binding (GO:0031418),Biological Process:oxidation-reduction process (GO:0055114)	prolyl 4-hydroxylase	Proline 4-hydroxylase (includes Rps23 Pro-64 3,4-dihydroxylase Tpa1), contains SM-20 domain	0.224413	0.658268	0.479374	0.326152	0.664197	PREDICTED: probable prolyl 4-hydroxylase 9 [Eucalyptus grandis]>gi|702461072|ref|XP_010028120.1| PREDICTED: probable prolyl 4-hydroxylase 9 [Eucalyptus grandis]>gi|629088524|gb|KCW54777.1| hypothetical protein EUGRSUZ_I00722 [Eucalyptus grandis]	PREDICTED: Vitis vinifera probable prolyl 4-hydroxylase 9 (LOC100256084), transcript variant X1, mRNA	prolyl 4-hydroxylase	Probable prolyl 4-hydroxylase 9 OS=Arabidopsis thaliana GN=P4H9 PE=2 SV=1	2OG-Fe(II) oxygenase superfamily//2OG-Fe(II) oxygenase superfamily	oxidation-reduction process	oxidoreductase activity	--
Tai6.5956	0.842763	0.53274	0.540458	0.537931	0.579728	Molecular Function:protein kinase activity (GO:0004672),Molecular Function:calcium ion binding (GO:0005509),Molecular Function:ATP binding (GO:0005524),Biological Process:protein phosphorylation (GO:0006468)	calcium-dependent protein kinase	Serine/threonine protein kinase	0.0159267	0.0169548	0.0321602	0	0.0160956	PREDICTED: calcium-dependent protein kinase 32-like [Nicotiana tomentosiformis]	PREDICTED: Nicotiana tomentosiformis calcium-dependent protein kinase 32-like (LOC104108350), mRNA	calcium-dependent protein kinase	Calcium-dependent protein kinase 32 OS=Arabidopsis thaliana GN=CPK32 PE=1 SV=1	EF hand//EF-hand domain pair//EF hand//Secreted protein acidic and rich in cysteine Ca binding region//Protein tyrosine kinase//EF-hand domain pair//Cytoskeletal-regulatory complex EF hand//EF-hand domain//Lipopolysaccharide kinase (Kdo/WaaP) family//Protein kinase domain	protein phosphorylation//signal transduction	calcium ion binding//phosphotransferase activity, alcohol group as acceptor//protein binding//protein kinase activity//ATP binding	--
Tai6.5953	0.92389	1.06977	1.11574	1.18828	1.19429	--	insulysin	Secreted/periplasmic Zn-dependent peptidases, insulinase-like	6.72501	6.09548	5.86727	6.54224	8.16202	PREDICTED: zinc-metallopeptidase, peroxisomal-like isoform X1 [Nicotiana sylvestris]	PREDICTED: Nicotiana sylvestris zinc-metallopeptidase, peroxisomal-like (LOC104231856), transcript variant X1, mRNA	insulysin	Zinc-metallopeptidase, peroxisomal OS=Arabidopsis thaliana GN=PXM16 PE=2 SV=1	--	--	--	N-arginine dibasic convertase NRD1 and related Zn2+-dependent endopeptidases, insulinase superfamily
Tai6.595	1.02303	1.08679	0.724052	0	0	Biological Process:amino acid transmembrane transport (GO:0003333),Molecular Function:amino acid transmembrane transporter activity (GO:0015171),Cellular Component:membrane (GO:0016020)	serine/threonine-protein phosphatase 2A regulatory subunit B'	Amino acid transporter	32.2447	30.3553	22.6227	41.0262	25.4113	PREDICTED: probable polyamine transporter At1g31830 [Nicotiana sylvestris]	PREDICTED: Nicotiana sylvestris probable polyamine transporter At1g31830 (LOC104213133), mRNA	--	Probable polyamine transporter At1g31830 OS=Arabidopsis thaliana GN=At1g31830 PE=2 SV=1	Amino acid permease//Amino acid permease//Viral methyltransferase	transmembrane transport//transport//amino acid transmembrane transport//mRNA methylation//amino acid transport//RNA processing//RNA modification	mRNA methyltransferase activity//RNA binding//amino acid transmembrane transporter activity	--
Tai6.5932	0.333333	0	0.313941	1.22905	1.05123	--	interleukin-1 receptor-associated kinase 1	--	10.1379	20.4945	10.7317	32.7296	12.7411	PREDICTED: receptor-like protein kinase FERONIA-like [Solanum tuberosum]	Ipomoea batatas DNA, microsatellite IBSSR02	--	Receptor-like protein kinase FERONIA OS=Arabidopsis thaliana GN=FER PE=1 SV=1	--	--	--	--
Tai6.5930	1.57762	0.442035	0.293148	0	0	Biological Process:carbohydrate metabolic process (GO:0005975)	mannan endo-1,4-beta-mannosidase	Endo-1,4-beta-mannosidase	0.283347	0.633634	0.127976	0.385856	0.129868	PREDICTED: mannan endo-1,4-beta-mannosidase 6 isoform X2 [Nicotiana sylvestris]	PREDICTED: Solanum tuberosum mannan endo-1,4-beta-mannosidase 6-like (LOC102591414), mRNA	mannan endo-1,4-beta-mannosidase	Mannan endo-1,4-beta-mannosidase 6 OS=Arabidopsis thaliana GN=MAN6 PE=2 SV=1	Protein kinase C terminal domain//Cellulase (glycosyl hydrolase family 5)//Succinylarginine dihydrolase	protein phosphorylation//carbohydrate metabolic process//arginine metabolic process//serine family amino acid metabolic process//phosphorylation	N-succinylarginine dihydrolase activity//hydrolase activity, hydrolyzing O-glycosyl compounds//protein serine/threonine kinase activity//ATP binding	--
Tai6.5919	1.07972	1.34986	1.19102	0.974879	0.951369	Molecular Function:structural constituent of ribosome (GO:0003735),Cellular Component:ribosome (GO:0005840),Biological Process:translation (GO:0006412)	small subunit ribosomal protein S19e	Ribosomal protein S19E (S16A)	3.12304	5.6628	9.51631	6.12074	5.4958	40S ribosomal protein S19-1 [Glycine soja]	PREDICTED: Sesamum indicum 40S ribosomal protein S19-3 (LOC105167640), mRNA	small subunit ribosomal protein S19e	40S ribosomal protein S19-3 OS=Arabidopsis thaliana GN=RPS19C PE=2 SV=1	Ribosomal protein S19e	translation//ribosome biogenesis	structural constituent of ribosome	40S ribosomal protein S19
Tai6.5918	1.06043	0.712336	0.45447	0	0	Molecular Function:NAD binding (GO:0051287),Biological Process:oxidation-reduction process (GO:0055114)	UDPglucose 6-dehydrogenase	UDP-glucose 6-dehydrogenase	0.163934	1.41721	0.625413	0.551907	0.782776	UDP-D-glucose dehydrogenase [Gossypium hirsutum]	Ipomoea batatas uridine diphosphate glucose dehydrogenase (UDPGH10) mRNA, complete cds	UDPglucose 6-dehydrogenase	UDP-glucose 6-dehydrogenase 5 OS=Oryza sativa subsp. japonica GN=UGD5 PE=2 SV=1	UDP-glucose/GDP-mannose dehydrogenase family, UDP binding domain//UDP-glucose/GDP-mannose dehydrogenase family, NAD binding domain//Saccharopine dehydrogenase NADP binding domain//NAD binding domain of 6-phosphogluconate dehydrogenase//UDP-glucose/GDP-mannose dehydrogenase family, central domain	pentose-phosphate shunt//D-gluconate metabolic process//oxidation-reduction process	NAD binding//phosphogluconate dehydrogenase (decarboxylating) activity//oxidoreductase activity, acting on the CH-OH group of donors, NAD or NADP as acceptor//oxidoreductase activity	UDP-glucose/GDP-mannose dehydrogenase
Tai6.5906	0.778566	0.695292	0.834488	1.45879	1.45467	Molecular Function:pyridoxal phosphate binding (GO:0030170)	cystathionine gamma-synthase	Cystathionine beta-lyase/cystathionine gamma-synthase	370.591	448.139	298.617	251.885	249.818	cystathionine gamma synthase 1 [Nicotiana tabacum]	PREDICTED: Nicotiana tomentosiformis cystathionine gamma-synthase, chloroplastic-like (LOC104089663), mRNA	cystathionine gamma-synthase	Cystathionine gamma-synthase 1, chloroplastic OS=Arabidopsis thaliana GN=CGS1 PE=1 SV=3	Mitochondrial 28S ribosomal protein S30 (PDCD9)//Cys/Met metabolism PLP-dependent enzyme//Beta-eliminating lyase	translation//cellular amino acid metabolic process//ribosome biogenesis	lyase activity//pyridoxal phosphate binding//structural constituent of ribosome	Cystathionine beta-lyases/cystathionine gamma-synthases
Tai6.5895	0.998509	0.597067	0.701583	0.948925	0.798686	Molecular Function:protein binding (GO:0005515)	ATP-dependent RNA helicase DOB1	WD40 repeat	0.688467	1.43465	1.47245	1.54377	0.756741	PREDICTED: WD repeat-containing protein 55 homolog isoform X1 [Sesamum indicum]	PREDICTED: Sesamum indicum WD repeat-containing protein 55 homolog (LOC105169485), mRNA	--	WD repeat-containing protein 55 homolog OS=Dictyostelium discoideum GN=wdr55 PE=3 SV=1	WD domain, G-beta repeat	--	protein binding	WD40 repeat protein
Tai6.589	0.820711	0.823867	0.650316	0	0	--	--	--	18.4817	26.4888	24.3164	21.4132	22.2319	PREDICTED: protein ENHANCED DISEASE RESISTANCE 2-like [Jatropha curcas]>gi|643718326|gb|KDP29586.1| hypothetical protein JCGZ_19352 [Jatropha curcas]	PREDICTED: Solanum tuberosum uncharacterized LOC102592298 (LOC102592298), mRNA	--	Protein ENHANCED DISEASE RESISTANCE 2-like OS=Arabidopsis thaliana GN=EDR2L PE=2 SV=1	--	--	--	--
Tai6.5889	0.908869	0.423242	0.510373	0.675632	0.618851	Molecular Function:nucleic acid binding (GO:0003676),Molecular Function:zinc ion binding (GO:0008270),Molecular Function:metal ion binding (GO:0046872)	pre-60S factor REI1	--	107.781	184.464	111.568	76.7156	73.554	PREDICTED: zinc finger protein 622-like [Nicotiana sylvestris]	PREDICTED: Nicotiana sylvestris cytoplasmic 60S subunit biogenesis factor SPCC550.15c (LOC104220126), mRNA	pre-60S factor REI1	Cytoplasmic 60S subunit biogenesis factor REI1 OS=Saccharomyces cerevisiae (strain ATCC 204508 / S288c) GN=REI1 PE=1 SV=3	Triple QxxK/R motif-containing protein family//Zinc finger, C2H2 type	--	metal ion binding	C2H2-type Zn-finger protein
Tai6.5865	0.983866	0.926636	0.52481	0	0	--	microsomal prostaglandin-E synthase 2	Glutathione S-transferase	0.933209	3.41392	3.27023	1.99639	3.78655	PREDICTED: prostaglandin E synthase 2 [Tarenaya hassleriana]	Glycine max cDNA, clone: GMFL01-05-C08	microsomal prostaglandin-E synthase 2	Prostaglandin E synthase 2 OS=Mus musculus GN=Ptges2 PE=1 SV=3	--	--	--	Glutathione S-transferase-related protein
Tai6.5858	1.15136	0.745698	0.742128	0.584211	2.28553	Biological Process:carbohydrate metabolic process (GO:0005975)	endoglucanase	Cellulase/cellobiase CelA1	21.923	46.0576	31.1829	32.183	41.6446	PREDICTED: endoglucanase 2-like [Nicotiana tomentosiformis]	PREDICTED: Solanum tuberosum endoglucanase 10-like (LOC102592746), mRNA	--	Endoglucanase 10 OS=Arabidopsis thaliana GN=At1g75680 PE=2 SV=2	Glycosyl hydrolase family 9	carbohydrate metabolic process	hydrolase activity, hydrolyzing O-glycosyl compounds	--
Tai6.5849	1.00957	1.31419	1.32175	1.05081	1.23865	Molecular Function:inorganic diphosphatase activity (GO:0004427),Molecular Function:hydrogen-translocating pyrophosphatase activity (GO:0009678),Biological Process:proton transport (GO:0015992),Cellular Component:membrane (GO:0016020)	inorganic pyrophosphatase	Na+ or H+-translocating membrane pyrophosphatase	11.2092	66.5627	75.0643	73.9054	163.319	pyrophosphate-energized vacuolar membrane proteon pump 1 [Ipomoea batatas]	Ipomoea batatas pyrophosphate-energized vacuolar membrane proteon pump 1 mRNA, complete cds	inorganic pyrophosphatase	Pyrophosphate-energized vacuolar membrane proton pump OS=Vigna radiata var. radiata PE=1 SV=4	Inorganic H+ pyrophosphatase//Gammaherpesvirus latent membrane protein (LMP2) protein	oxidative phosphorylation//proton transport//viral latency	hydrogen-translocating pyrophosphatase activity//inorganic diphosphatase activity	--
Tai6.5839	0.988793	0.899456	1.05202	1.12382	1.18384	--	--	--	23.5882	31.9935	29.2292	28.3374	26.2832	PREDICTED: LOW QUALITY PROTEIN: spindle pole body component 110 [Nicotiana sylvestris]	PREDICTED: Solanum tuberosum myosin-6-like (LOC102593542), mRNA	--	--	DIRP//UvrB/uvrC motif	transcription, DNA-templated//cell cycle	protein binding	--
Tai6.5822	1.1231	0.973927	0.719525	0.470588	0.458895	Molecular Function:DNA binding (GO:0003677),Molecular Function:DNA helicase activity (GO:0003678),Molecular Function:chromatin binding (GO:0003682),Molecular Function:DNA replication origin binding (GO:0003688),Molecular Function:ATP binding (GO:0005524),Cellular Component:nucleus (GO:0005634),Biological Process:DNA replication (GO:0006260),Biological Process:DNA replication initiation (GO:000627…	DNA replication licensing factor MCM5	DNA replicative helicase MCM subunit Mcm2, Cdc46/Mcm family	27.7262	19.4144	40.0929	34.8193	60.3802	PREDICTED: DNA replication licensing factor mcm5-A-like [Solanum tuberosum]	PREDICTED: Nicotiana tomentosiformis DNA replication licensing factor MCM5 (LOC104084991), mRNA	DNA replication licensing factor MCM5	DNA replication licensing factor MCM5 OS=Arabidopsis thaliana GN=MCM5 PE=1 SV=1	ATPase family associated with various cellular activities (AAA)//AAA domain (dynein-related subfamily)//Sigma-54 interaction domain//MCM2/3/5 family	DNA replication//regulation of transcription, DNA-templated	transcription factor binding//ATP binding//ATPase activity//DNA binding	DNA replication licensing factor, MCM5 component
Tai6.5815	1.05822	1.01526	0.766418	0	0	Cellular Component:integral component of membrane (GO:0016021)	tetraspanin-5	--	2.89403	16.4732	5.25583	9.45014	20.2941	unnamed protein product [Coffea canephora]	PREDICTED: Nicotiana tomentosiformis protein TORNADO 2-like (LOC104120178), mRNA	--	Protein TORNADO 2 OS=Arabidopsis thaliana GN=TRN2 PE=1 SV=1	Tetraspanin family	--	--	--
Tai6.5814	1.02218	0.879496	0.496103	0	0	Molecular Function:protein dimerization activity (GO:0046983)	DNA-directed RNA polymerases I and III subunit RPAC2	--	0	0.224737	0	0.0622426	0.0492379	unnamed protein product [Coffea canephora]	PREDICTED: Nicotiana tomentosiformis DNA-directed RNA polymerases I and III subunit RPAC2 (LOC104098040), transcript variant X2, mRNA	DNA-directed RNA polymerases I and III subunit RPAC2	DNA-directed RNA polymerases I and III subunit RPAC2 OS=Bos taurus GN=POLR1D PE=2 SV=1	RNA polymerase Rpb3/Rpb11 dimerisation domain	transcription, DNA-templated	protein dimerization activity	DNA-directed RNA polymerase, subunit L
Tai6.5813	1.02222	1.02997	0.846535	0.489513	0.600489	Molecular Function:nucleic acid binding (GO:0003676)	polyadenylate-binding protein	RNA recognition motif (RRM) domain	10.1203	20.2949	27.0098	20.0427	23.8849	PREDICTED: 29 kDa ribonucleoprotein, chloroplastic [Sesamum indicum]	Sorghum bicolor hypothetical protein, mRNA	polyadenylate-binding protein	29 kDa ribonucleoprotein A, chloroplastic OS=Nicotiana sylvestris PE=2 SV=1	Transactivating regulatory protein (Tat)//RNA recognition motif. (a.k.a. RRM, RBD, or RNP domain)	regulation of transcription, DNA-templated	nucleic acid binding//transcription factor activity, sequence-specific DNA binding	--
Tai6.5791	0.830885	1.15932	1.39458	1.574	1.40894	Molecular Function:protein binding (GO:0005515)	protein phosphatase 1 regulatory subunit 12C	Ankyrin repeat	47.0828	64.1196	61.5812	64.1097	62.3488	PREDICTED: calmodulin-binding transcription activator 2-like isoform X2 [Nicotiana tomentosiformis]	PREDICTED: Nicotiana sylvestris calmodulin-binding transcription activator 2-like (LOC104245085), transcript variant X2, mRNA	--	Calmodulin-binding transcription activator 2 OS=Arabidopsis thaliana GN=CMTA2 PE=1 SV=1	Ankyrin repeat//Ankyrin repeat//IQ calmodulin-binding motif//IPT/TIG domain	--	protein binding	--
Tai6.5785	0.996893	0.897173	1.01596	1.24471	1.13373	--	--	--	0.0238858	0	0	0.0288223	0	PREDICTED: uncharacterized protein LOC101245808 [Solanum lycopersicum]	Solanum pennellii chromosome ch10, complete genome	--	Hyccin OS=Homo sapiens GN=FAM126A PE=1 SV=2	Linker for activation of T-cells	signal transduction	--	--
Tai6.5751	1.04906	0.956653	1.01037	1.2621	1.17344	--	citrate synthase	Citrate synthase	174.582	126.981	140.946	106.257	122.285	unnamed protein product [Coffea canephora]	PREDICTED: Nicotiana sylvestris citrate synthase, glyoxysomal-like (LOC104228294), mRNA	citrate synthase	Citrate synthase 2, peroxisomal OS=Arabidopsis thaliana GN=CSY2 PE=2 SV=1	Citrate synthase	--	transferase activity, transferring acyl groups, acyl groups converted into alkyl on transfer	Citrate synthase
Tai6.5748	0.333333	0	0.290792	0.62224	0.907647	Molecular Function:GPI-anchor transamidase activity (GO:0003923),Biological Process:proteolysis (GO:0006508),Molecular Function:peptidase activity (GO:0008233),Biological Process:attachment of GPI anchor to protein (GO:0016255),Cellular Component:GPI-anchor transamidase complex (GO:0042765)	phosphatidylinositol glycan, class K	Glycosylphosphatidylinositol transamidase (GPIT), subunit GPI8	13.0619	14.776	14.4556	12.7578	12.2792	PREDICTED: putative GPI-anchor transamidase [Sesamum indicum]>gi|747099985|ref|XP_011098062.1| PREDICTED: putative GPI-anchor transamidase [Sesamum indicum]	PREDICTED: Nicotiana sylvestris putative GPI-anchor transamidase (LOC104246808), transcript variant X2, mRNA	phosphatidylinositol glycan, class K	GPI-anchor transamidase OS=Saccharomyces cerevisiae (strain ATCC 204508 / S288c) GN=GPI8 PE=1 SV=1	Peptidase C13 family	proteolysis	peptidase activity	Gpi-anchor transamidase
Tai6.5727	0.333333	0	0.362119	1.24322	1.39883	--	E3 ubiquitin-protein ligase BRE1	--	27.7782	25.6368	25.2269	32.1308	35.7124	PREDICTED: E3 ubiquitin-protein ligase BRE1-like 2-like isoform X2 [Solanum tuberosum]	--	E3 ubiquitin-protein ligase BRE1	E3 ubiquitin-protein ligase BRE1-like 2 OS=Arabidopsis thaliana GN=HUB2 PE=2 SV=2	Hr1 repeat//TMPIT-like protein//Cell division protein FtsL	cell cycle//signal transduction//cell division	--	--
Tai6.5717	1.10655	1.38279	1.06721	1.05744	1.00444	Molecular Function:translation initiation factor activity (GO:0003743),Molecular Function:protein binding (GO:0005515),Cellular Component:eukaryotic translation initiation factor 3 complex (GO:0005852),Biological Process:translational initiation (GO:0006413),Molecular Function:translation initiation factor binding (GO:0031369)	translation initiation factor 3 subunit C	--	0	0.119785	0.0139097	0.0264783	0.0160047	PREDICTED: eukaryotic translation initiation factor 3 subunit C [Nicotiana sylvestris]	PREDICTED: Solanum tuberosum eukaryotic translation initiation factor 3 subunit C-like (LOC102595553), mRNA	translation initiation factor 3 subunit C	Eukaryotic translation initiation factor 3 subunit C OS=Arabidopsis thaliana GN=TIF3C1 PE=1 SV=2	Protein of unknown function, DUF479//V-type ATPase 116kDa subunit family//Eukaryotic translation initiation factor 3 subunit 8 N-terminus//PCI domain	proton transport//pantothenate biosynthetic process//regulation of translational initiation//ATP hydrolysis coupled proton transport//fatty acid biosynthetic process//translational initiation	hydrogen ion transmembrane transporter activity//[acyl-carrier-protein] phosphodiesterase activity//translation initiation factor activity//translation initiation factor binding//protein binding	Translation initiation factor 3, subunit c (eIF-3c)
Tai6.5709	0.333333	0	0.306517	0.80767	0.859285	--	--	--	0	0.186598	0	0.172999	0	PREDICTED: uncharacterized protein YMR315W-like [Solanum tuberosum]	PREDICTED: Gossypium raimondii uncharacterized LOC105773531 (LOC105773531), transcript variant X3, mRNA	--	--	Oxidoreductase family, C-terminal alpha/beta domain//Initiation factor 2 subunit family	oxidation-reduction process//cellular metabolic process//metabolic process	oxidoreductase activity	--
Tai6.569	0.969504	1.46972	1.41011	1.68563	1.31342	Molecular Function:structural constituent of ribosome (GO:0003735),Cellular Component:ribosome (GO:0005840),Biological Process:translation (GO:0006412)	large subunit ribosomal protein L4	Ribosomal protein L4	0.0429106	0.022585	0.0650908	0.0299469	0.0214405	PREDICTED: 50S ribosomal protein L4, chloroplastic [Nicotiana sylvestris]>gi|6919958|sp|O80361.1|RK4_TOBAC RecName: Full=50S ribosomal protein L4, chloroplastic; AltName: Full=CL4; AltName: Full=R-protein L4; Flags: Precursor [Nicotiana tabacum]>gi|3298439|dbj|BAA31510.1| chloroplast ribosomal protein L4 [Nicotiana tabacum]	PREDICTED: Sesamum indicum 50S ribosomal protein L4, chloroplastic (LOC105164012), mRNA	large subunit ribosomal protein L4	50S ribosomal protein L4, chloroplastic OS=Nicotiana tabacum GN=RPL4 PE=2 SV=1	Ribosomal protein L4/L1 family	ribosome biogenesis//translation	rRNA binding//structural constituent of ribosome	Mitochondrial/chloroplast ribosomal protein L4
Tai6.5680	0.333333	0	0.266207	0.492263	0.580719	Molecular Function:nucleic acid binding (GO:0003676)	nucleolysin TIA-1/TIAR	RNA recognition motif (RRM) domain	169.214	87.0837	125.8	103.379	112.277	unnamed protein product [Coffea canephora]	Nicotiana plumbaginifolia mRNA for oligouridylate binding protein (ubp1 gene)	nucleolysin TIA-1/TIAR	Oligouridylate-binding protein 1 OS=Nicotiana plumbaginifolia GN=UBP1 PE=2 SV=1	RNA recognition motif. (a.k.a. RRM, RBD, or RNP domain)	--	nucleic acid binding	Apoptosis-promoting RNA-binding protein TIA-1/TIAR (RRM superfamily)
Tai6.5656	1.03947	0.535819	0.518159	0.453445	0.559032	Molecular Function:oxygen binding (GO:0019825),Molecular Function:heme binding (GO:0020037)	--	Hemoglobin-like flavoprotein	48.481	7.56271	15.8295	22.87	82.9468	PREDICTED: non-symbiotic hemoglobin 1 [Nicotiana sylvestris]	--	--	Non-symbiotic hemoglobin 1 OS=Gossypium hirsutum GN=HB1 PE=2 SV=1	Globin	--	heme binding//oxygen binding	--
Tai6.5655	1.1319	0.842532	0.742165	0.531766	0.563325	--	aminopeptidase N	Uncharacterized conserved protein YbjT, contains NAD(P)-binding and DUF2867 domains	0.720791	7.41638	9.26244	9.08334	11.0477	PREDICTED: protein TIC 62, chloroplastic isoform X4 [Nicotiana sylvestris]	PREDICTED: Vitis vinifera protein TIC 62, chloroplastic (LOC100262319), mRNA	--	Protein TIC 62, chloroplastic OS=Arabidopsis thaliana GN=TIC62 PE=1 SV=1	3-beta hydroxysteroid dehydrogenase/isomerase family//NAD dependent epimerase/dehydratase family//short chain dehydrogenase	metabolic process//steroid biosynthetic process//oxidation-reduction process//androgen metabolic process//estrogen metabolic process//C21-steroid hormone metabolic process	3-beta-hydroxy-delta5-steroid dehydrogenase activity//oxidoreductase activity, acting on the CH-OH group of donors, NAD or NADP as acceptor//catalytic activity//coenzyme binding//oxidoreductase activity	--
Tai6.5631	1.08639	1.27495	1.22203	1.1992	1.23393	Molecular Function:hydrogen ion transmembrane transporter activity (GO:0015078),Biological Process:ATP hydrolysis coupled proton transport (GO:0015991)	V-type H+-transporting ATPase subunit a	Archaeal/vacuolar-type H+-ATPase subunit I/STV1	134.551	231.926	183.369	193.695	216.926	PREDICTED: V-type proton ATPase subunit a2-like [Nicotiana tomentosiformis]	PREDICTED: Nicotiana tomentosiformis V-type proton ATPase subunit a2-like (LOC104097383), mRNA	V-type H+-transporting ATPase subunit a	V-type proton ATPase subunit a3 OS=Arabidopsis thaliana GN=VHA-a3 PE=1 SV=1	V-type ATPase 116kDa subunit family//Protein incorporated later into Tight Junctions	ATP hydrolysis coupled proton transport//proton transport	hydrogen ion transmembrane transporter activity	Vacuolar H+-ATPase V0 sector, subunit a
Tai6.5624	1.00178	0.812907	0.798885	1.0569	0.511272	--	3-epi-6-deoxocathasterone 23-monooxygenase	--	9.80481	17.2243	13.1412	13.8341	13.4336	PREDICTED: PRA1 family protein B3 [Sesamum indicum]	PREDICTED: Nicotiana tomentosiformis PRA1 family protein B1-like (LOC104110915), mRNA	--	PRA1 family protein B3 OS=Arabidopsis thaliana GN=PRA1B3 PE=1 SV=1	--	--	--	--
Tai6.5615	0.952449	0.586941	0.352969	0	0	Cellular Component:mitochondrial outer membrane (GO:0005741),Biological Process:transmembrane transport (GO:0055085)	voltage-dependent anion channel protein 2	--	0.304955	0.349733	0.263664	0.336457	0.224455	PREDICTED: mitochondrial outer membrane protein porin of 34 kDa [Nicotiana sylvestris]	Solanum tuberosum clone 154C04 34 kDa outer mitochondrial membrane protein porin-like protein mRNA, complete cds; nuclear gene for mitochondrial product	voltage-dependent anion channel protein 2	Mitochondrial outer membrane protein porin of 34 kDa OS=Solanum tuberosum PE=1 SV=2	Eukaryotic porin	transmembrane transport	--	Porin/voltage-dependent anion-selective channel protein
Tai6.5602	0.998483	0.864422	0.82095	1.08364	0.794753	--	--	--	0.270611	0.344123	0.147148	0.301125	0.254005	PREDICTED: uncharacterized protein LOC101261386 [Solanum lycopersicum]	PREDICTED: Nicotiana sylvestris uncharacterized LOC104212451 (LOC104212451), mRNA	--	--	--	--	--	--
Tai6.560	0.94186	0.989018	0.653101	0	0	--	peptidyl-prolyl cis-trans isomerase B (cyclophilin B)	Lipopolysaccharide biosynthesis protein, LPS:glycosyltransferase	1.2073	12.0482	11.2612	4.70482	2.75437	PREDICTED: uncharacterized protein LOC104244070 [Nicotiana sylvestris]	--	--	Protein CDI OS=Arabidopsis thaliana GN=CDI PE=2 SV=1	--	--	--	--
Tai6.5574	0.786603	0.51887	0.27544	0	0	--	RNA-binding protein Musashi	--	11.6789	18.7307	4.6073	7.55678	14.8314	PREDICTED: protein IQ-DOMAIN 1-like [Nicotiana tomentosiformis]	PREDICTED: Gossypium raimondii protein IQ-DOMAIN 1-like (LOC105771111), mRNA	--	Protein IQ-DOMAIN 1 OS=Arabidopsis thaliana GN=IQD1 PE=1 SV=1	IQ calmodulin-binding motif	--	protein binding	--
Tai6.5569	0.921369	1.20805	1.46891	1.27414	1.6851	Molecular Function:glycylpeptide N-tetradecanoyltransferase activity (GO:0004379),Biological Process:N-terminal protein myristoylation (GO:0006499)	glycylpeptide N-tetradecanoyltransferase	--	174.639	235.615	194.337	189.21	168.375	PREDICTED: glycylpeptide N-tetradecanoyltransferase 1-like [Sesamum indicum]	PREDICTED: Nicotiana sylvestris glycylpeptide N-tetradecanoyltransferase 1-like (LOC104241911), mRNA	glycylpeptide N-tetradecanoyltransferase	Glycylpeptide N-tetradecanoyltransferase 1 OS=Arabidopsis thaliana GN=NMT1 PE=1 SV=2	Myristoyl-CoA:protein N-myristoyltransferase, N-terminal domain//Acetyltransferase (GNAT) domain//Myristoyl-CoA:protein N-myristoyltransferase, C-terminal domain	acyl-carrier-protein biosynthetic process	N-acetyltransferase activity//glycylpeptide N-tetradecanoyltransferase activity	N-myristoyl transferase
Tai6.5568	0.981668	0.859151	0.802781	0.57094	0.605769	Biological Process:metabolic process (GO:0008152)	pyruvate dehydrogenase E2 component (dihydrolipoamide acetyltransferase)	Pyruvate/2-oxoglutarate dehydrogenase complex, dihydrolipoamide acyltransferase (E2) component	133.597	93.315	100.327	94.2359	95.9701	PREDICTED: dihydrolipoyllysine-residue acetyltransferase component 2 of pyruvate dehydrogenase complex, mitochondrial-like isoform X1 [Nicotiana sylvestris]	PREDICTED: Nicotiana sylvestris dihydrolipoyllysine-residue acetyltransferase component 2 of pyruvate dehydrogenase complex, mitochondrial-like (LOC104224582), mRNA	pyruvate dehydrogenase E2 component (dihydrolipoamide acetyltransferase)	Dihydrolipoyllysine-residue acetyltransferase component 2 of pyruvate dehydrogenase complex, mitochondrial OS=Arabidopsis thaliana GN=At3g13930 PE=2 SV=2	e3 binding domain//Adenylate cyclase associated (CAP) N terminal//2-oxoacid dehydrogenases acyltransferase (catalytic domain)	metabolic process//cytoskeleton organization	transferase activity, transferring acyl groups//actin binding	Dihydrolipoamide acetyltransferase
Tai6.5564	0.333333	0	0.297715	0.781586	1.27554	--	--	--	0.342464	0.655473	0.173429	0.0527213	0.126035	ataxin-2 related protein [Ipomoea nil]	Ipomoea nil In25 mRNA for ataxin-2 related protein, complete cds	--	Polyadenylate-binding protein-interacting protein 3 OS=Arabidopsis thaliana GN=CID3 PE=2 SV=1	--	--	--	--
Tai6.5556	1.34814	0.65337	0.698481	0.60391	0.711079	--	--	Phage-related protein, tail component	75.8413	94.7483	81.3725	89.514	90.7006	PREDICTED: uncharacterized protein LOC101243915 [Solanum lycopersicum]	PREDICTED: Nicotiana tomentosiformis uncharacterized LOC104097881 (LOC104097881), transcript variant X2, mRNA	--	--	Herpesvirus latent membrane protein 1 (LMP1)//Nine Cysteines Domain of family 3 GPCR	transformation of host cell by virus//G-protein coupled receptor signaling pathway	G-protein coupled receptor activity	--
Tai6.5548	1.06715	1.03201	0.68476	0	0	Molecular Function:protein kinase activity (GO:0004672),Molecular Function:protein binding (GO:0005515),Molecular Function:ATP binding (GO:0005524),Biological Process:protein phosphorylation (GO:0006468)	--	Leucine-rich repeat (LRR) protein	27.1233	22.2465	22.1781	25.6793	29.2857	PREDICTED: receptor-like protein kinase HSL1 [Nicotiana sylvestris]	PREDICTED: Solanum tuberosum receptor-like protein kinase HSL1-like (LOC102601029), mRNA	--	Receptor-like protein kinase 5 OS=Arabidopsis thaliana GN=RLK5 PE=1 SV=1	Leucine rich repeat//Protein kinase domain//Leucine Rich Repeat//Protein tyrosine kinase	protein phosphorylation	ATP binding//protein binding//protein kinase activity	--
Tai6.55447	1.01815	0.953795	0.92815	0.673795	0.699361	Molecular Function:copper ion binding (GO:0005507)	iron transport multicopper oxidase	Multicopper oxidase with three cupredoxin domains (includes cell division protein FtsP and spore coat protein CotA)	32.9104	49.0769	56.5668	95.0102	51.0395	hypothetical protein CICLE_v10019410mg [Citrus clementina]>gi|568846833|ref|XP_006477247.1| PREDICTED: monocopper oxidase-like protein SKU5-like [Citrus sinensis]>gi|557542635|gb|ESR53613.1| hypothetical protein CICLE_v10019410mg [Citrus clementina]>gi|641829250|gb|KDO48373.1| hypothetical protein CISIN_1g007735mg [Citrus sinensis]	PREDICTED: Nicotiana tomentosiformis monocopper oxidase-like protein SKU5 (LOC104120468), mRNA	--	Monocopper oxidase-like protein SKU5 OS=Arabidopsis thaliana GN=SKU5 PE=1 SV=1	Multicopper oxidase	--	copper ion binding	--
Tai6.5542	0.995684	0.989708	1.30146	1.40905	1.43619	Molecular Function:nucleic acid binding (GO:0003676),Molecular Function:ATP binding (GO:0005524)	antiviral helicase SKI2	Superfamily II RNA helicase	12.0388	12.5631	11.906	15.6136	17.9527	PREDICTED: antiviral helicase SKI2-like [Solanum tuberosum]	PREDICTED: Nicotiana tomentosiformis putative ATP-dependent RNA helicase C550.03c (LOC104115109), mRNA	antiviral helicase SKI2	ATP-dependent RNA helicase SKI2 OS=Arabidopsis thaliana GN=SKI2 PE=1 SV=1	Type III restriction enzyme, res subunit//DEAD/DEAH box helicase	--	hydrolase activity//DNA binding//nucleic acid binding//ATP binding	Cytoplasmic exosomal RNA helicase SKI2, DEAD-box superfamily
Tai6.5540	0.902458	0.692524	0.740736	0.672552	0.846977	--	antiviral helicase SKI2	Superfamily II RNA helicase	36.789	32.0335	32.9261	39.6639	42.4186	PREDICTED: helicase SKI2W [Nicotiana sylvestris]	PREDICTED: Nicotiana tomentosiformis putative ATP-dependent RNA helicase C550.03c (LOC104115109), mRNA	antiviral helicase SKI2	ATP-dependent RNA helicase SKI2 OS=Arabidopsis thaliana GN=SKI2 PE=1 SV=1	--	--	--	Cytoplasmic exosomal RNA helicase SKI2, DEAD-box superfamily
Tai6.5528	1.10823	1.30782	1.15285	0.801377	2.52163	--	nucleolar protein 4	--	10.6574	12.4513	16.236	16.8174	14.2229	PREDICTED: single-stranded DNA-bindig protein WHY2, mitochondrial isoform X2 [Nicotiana sylvestris]	PREDICTED: Nicotiana tomentosiformis single-stranded DNA-bindig protein WHY2, mitochondrial (LOC104094184), transcript variant X3, mRNA	--	Single-stranded DNA-bindig protein WHY2, mitochondrial OS=Solanum tuberosum GN=WHY2 PE=1 SV=1	--	--	--	--
Tai6.55236	0.995134	1.05144	1.04605	0.727019	0.863649	--	peroxisomal 2,4-dienoyl-CoA reductase	NAD(P)-dependent dehydrogenase, short-chain alcohol dehydrogenase family	131.408	79.7488	95.7777	85.8704	94.4487	hypothetical protein CICLE_v10005524mg [Citrus clementina]>gi|568881831|ref|XP_006493753.1| PREDICTED: peroxisomal 2,4-dienoyl-CoA reductase-like [Citrus sinensis]>gi|557524159|gb|ESR35526.1| hypothetical protein CICLE_v10005524mg [Citrus clementina]>gi|641842649|gb|KDO61553.1| hypothetical protein CISIN_1g022335mg [Citrus sinensis]	Arabidopsis lyrata subsp. lyrata short-chain dehydrogenase/reductase family protein, mRNA	peroxisomal 2,4-dienoyl-CoA reductase	Peroxisomal 2,4-dienoyl-CoA reductase OS=Arabidopsis thaliana GN=At3g12800 PE=2 SV=1	short chain dehydrogenase	metabolic process	oxidoreductase activity	Reductases with broad range of substrate specificities
Tai6.55186	0.991132	0.64554	0.77473	1.30224	1.18733	--	dihydrolipoamide dehydrogenase	Pyruvate/2-oxoglutarate dehydrogenase complex, dihydrolipoamide dehydrogenase (E3) component or related enzyme	0.794074	1.5393	1.16351	1.06916	0.84288	hypothetical protein CISIN_1g0087141mg, partial [Citrus sinensis]	PREDICTED: Nicotiana tomentosiformis dihydrolipoyl dehydrogenase 2, chloroplastic-like (LOC104098841), mRNA	dihydrolipoamide dehydrogenase	Dihydrolipoyl dehydrogenase 1, chloroplastic OS=Arabidopsis thaliana GN=LPD1 PE=2 SV=1	--	--	--	Dihydrolipoamide dehydrogenase
Tai6.55102	1.01026	0.932525	0.960456	1.11457	0.90585	Molecular Function:phosphomevalonate kinase activity (GO:0004631),Molecular Function:ATP binding (GO:0005524)	phosphomevalonate kinase	Phosphomevalonate kinase	20.1934	15.4024	15.999	23.3121	24.8283	PREDICTED: phosphomevalonate kinase-like [Solanum tuberosum]	PREDICTED: Sesamum indicum phosphomevalonate kinase (LOC105159321), transcript variant X2, mRNA	phosphomevalonate kinase	Phosphomevalonate kinase OS=Saccharomyces cerevisiae (strain ATCC 204508 / S288c) GN=ERG8 PE=1 SV=2	GHMP kinases N terminal domain	--	ATP binding	Phosphomevalonate kinase
Tai6.5509	1.04201	1.26838	0.801634	0	0	Molecular Function:protein domain specific binding (GO:0019904)	14-3-3 protein epsilon	--	848.865	467.568	661.134	878	806.888	RecName: Full=14-3-3 protein 1>gi|22095150|emb|CAA65145.2| 14-3-3 protein [Solanum lycopersicum]	PREDICTED: Erythranthe guttatus 14-3-3 protein 1-like (LOC105965149), mRNA	14-3-3 protein epsilon	14-3-3 protein 1 OS=Solanum lycopersicum GN=TFT1 PE=3 SV=2	--	--	--	Multifunctional chaperone (14-3-3 family)
Tai6.55052	0.761168	0.462963	0.303169	0	0	Molecular Function:protein kinase activity (GO:0004672),Molecular Function:ATP binding (GO:0005524),Biological Process:protein phosphorylation (GO:0006468)	5'-AMP-activated protein kinase, catalytic alpha subunit	--	29.4961	34.4628	29.0027	32.0683	27.4977	PREDICTED: CBL-interacting serine/threonine-protein kinase 8 isoform X1 [Nicotiana tomentosiformis]	PREDICTED: Nicotiana sylvestris CBL-interacting serine/threonine-protein kinase 8 (LOC104237642), transcript variant X6, misc_RNA	--	CBL-interacting protein kinase 8 OS=Oryza sativa subsp. japonica GN=CIPK8 PE=2 SV=1	Protein kinase domain	protein phosphorylation	ATP binding//protein kinase activity	--
Tai6.5505	0.936927	1.19949	0.79758	0	0	--	calmodulin	--	0.0813256	0.0438599	0	0	0	PREDICTED: UPF0483 protein CG5412-like [Nicotiana sylvestris]	PREDICTED: Nicotiana sylvestris UPF0483 protein AGAP003155-like (LOC104238665), mRNA	--	Dihydrofolate reductase OS=Schizosaccharomyces pombe (strain 972 / ATCC 24843) GN=dfr1 PE=2 SV=2	--	--	--	Phospholipase/carboxyhydrolase
Tai6.55031	1.08149	0.641509	0.684113	0.584565	0.738916	Biological Process:transport (GO:0006810),Cellular Component:integral component of membrane (GO:0016021)	phosphatidylinositol transfer protein SFH5	--	343.257	172.839	107.58	222.517	216.985	PREDICTED: patellin-3-like [Nicotiana tomentosiformis]	PREDICTED: Nicotiana tomentosiformis patellin-3-like (LOC104109702), mRNA	--	Patellin-5 OS=Arabidopsis thaliana GN=PATL5 PE=1 SV=2	--	--	--	--
Tai6.54971	1.05105	1.12801	1.13017	0.637974	0.67515	Biological Process:oxidation-reduction process (GO:0055114)	--	Zn-dependent alcohol dehydrogenase	82.2336	64.3011	72.3085	51.027	50.8751	PREDICTED: alcohol dehydrogenase 1B [Sesamum indicum]	PREDICTED: Vitis vinifera alcohol dehydrogenase 1 (LOC100260980), mRNA	--	Succinate-semialdehyde dehydrogenase (acetylating) OS=Metallosphaera sedula (strain ATCC 51363 / DSM 5348) GN=Msed_1424 PE=1 SV=1	Zinc-binding dehydrogenase	oxidation-reduction process	--	--
Tai6.54926	0.960871	0.841718	0.848237	0.785607	0.993074	--	callose synthase	--	19.1019	26.3815	24.3875	28.7783	22.0229	PREDICTED: callose synthase 10 isoform X1 [Tarenaya hassleriana]	PREDICTED: Nicotiana tomentosiformis callose synthase 10 (LOC104106350), mRNA	callose synthase	Callose synthase 10 OS=Arabidopsis thaliana GN=CALS10 PE=2 SV=5	--	--	--	--
Tai6.54894	0.785414	2.1856	0.996916	0.603516	0.571398	Biological Process:metabolic process (GO:0008152),Molecular Function:uridylyltransferase activity (GO:0070569)	--	UDP-N-acetylglucosamine pyrophosphorylase	4.81131	3.89847	1.80033	0.766656	1.76424	unnamed protein product [Coffea canephora]	PREDICTED: Nicotiana sylvestris UDP-N-acetylglucosamine diphosphorylase 1 (LOC104222819), mRNA	UDP-N-acetylglucosamine/UDP-N-acetylgalactosamine diphosphorylase	UDP-N-acetylglucosamine diphosphorylase 1 OS=Arabidopsis thaliana GN=GLCNAC1PUT1 PE=1 SV=1	UTP--glucose-1-phosphate uridylyltransferase	metabolic process	uridylyltransferase activity	UDP-N-acetylglucosamine pyrophosphorylase
Tai6.54892	0.928968	1.17055	0.860155	0	0	--	AFG3 family protein	Uncharacterized conserved protein YbjT, contains NAD(P)-binding and DUF2867 domains	0.158428	0	0	0	0	PREDICTED: uncharacterized protein At5g02240-like [Malus domestica]	Phaseolus vulgaris hypothetical protein (PHAVU_010G011300g) mRNA, complete cds	--	Uncharacterized protein At2g37660, chloroplastic OS=Arabidopsis thaliana GN=At2g37660 PE=2 SV=2	3-beta hydroxysteroid dehydrogenase/isomerase family	steroid biosynthetic process//estrogen metabolic process//C21-steroid hormone metabolic process//oxidation-reduction process//androgen metabolic process	oxidoreductase activity, acting on the CH-OH group of donors, NAD or NADP as acceptor//3-beta-hydroxy-delta5-steroid dehydrogenase activity	--
Tai6.5489	1.04637	1.4077	1.04549	0	0	--	5'-AMP-activated protein kinase, regulatory beta subunit	--	0.35716	0.22812	0.0605564	0.286776	0.189749	SNF1 kinase complex anchoring protein [Solanum lycopersicum]>gi|348167270|gb|AEP68531.1| Gal83 [Solanum lycopersicum]	--	5'-AMP-activated protein kinase, regulatory beta subunit	SNF1-related protein kinase regulatory subunit beta-1 OS=Arabidopsis thaliana GN=KINB1 PE=1 SV=1	--	--	--	Protein involved in Snf1 protein kinase complex assembly
Tai6.54876	0.785882	0.55257	0.367456	0	0	--	serine racemase	Threonine dehydratase	8.72255	8.9053	8.39372	9.47724	11.2697	PREDICTED: serine racemase isoform X1 [Sesamum indicum]	PREDICTED: Solanum tuberosum serine racemase-like (LOC102594901), mRNA	serine racemase	Serine racemase OS=Arabidopsis thaliana GN=SR PE=1 SV=1	--	--	--	Serine racemase
Tai6.5486	0.919414	1.22637	1.16153	2.30561	2.39283	Molecular Function:structural constituent of ribosome (GO:0003735),Cellular Component:intracellular (GO:0005622),Cellular Component:ribosome (GO:0005840),Biological Process:translation (GO:0006412)	large subunit ribosomal protein L35	Ribosomal protein L35	1.94497	3.84795	4.46868	2.97899	3.33037	PREDICTED: 50S ribosomal protein L35, chloroplastic-like [Erythranthe guttatus]>gi|604328841|gb|EYU34323.1| hypothetical protein MIMGU_mgv1a015658mg [Erythranthe guttata]	Solanum lycopersicum cDNA, clone: LEFL1004AF11, HTC in leaf	large subunit ribosomal protein L35	50S ribosomal protein L35, chloroplastic OS=Spinacia oleracea GN=RPL35 PE=1 SV=1	Ribosomal protein L35	translation//ribosome biogenesis	structural constituent of ribosome	--
Tai6.54828	0.898265	1.7473	1.60451	2.41748	1.96869	Molecular Function:protein binding (GO:0005515)	small ubiquitin-related modifier	--	175.631	160.737	188.234	183.99	157.659	unknown [Picea sitchensis]>gi|116793657|gb|ABK26830.1| unknown [Picea sitchensis]>gi|148907354|gb|ABR16812.1| unknown [Picea sitchensis]>gi|224284472|gb|ACN39970.1| unknown [Picea sitchensis]>gi|224286696|gb|ACN41051.1| unknown [Picea sitchensis]	PREDICTED: Pyrus x bretschneideri small ubiquitin-related modifier 1 (LOC103951409), mRNA	small ubiquitin-related modifier	Small ubiquitin-related modifier 1 OS=Oryza sativa subsp. japonica GN=SUMO1 PE=1 SV=1	Ubiquitin family	--	protein binding	Ubiquitin-like proteins
Tai6.54817	0.333333	0	0.271682	0.781348	0.703501	--	--	--	16.0008	13.7557	13.0919	10.1721	9.46289	PREDICTED: cytochrome b5-like [Gossypium raimondii]>gi|763752486|gb|KJB19874.1| hypothetical protein B456_003G122800 [Gossypium raimondii]>gi|763752487|gb|KJB19875.1| hypothetical protein B456_003G122800 [Gossypium raimondii]	--	--	Cytochrome b5 isoform E OS=Arabidopsis thaliana GN=CYTB5-E PE=1 SV=2	--	--	--	--
Tai6.54812	0.864583	1.33125	1.6257	1.63689	2.21133	Molecular Function:serine-type carboxypeptidase activity (GO:0004185),Biological Process:proteolysis (GO:0006508)	serine carboxypeptidase-like clade I	--	35.4274	39.7787	24.1262	27.9728	34.0036	hypothetical protein CISIN_1g012205mg [Citrus sinensis]	Populus trichocarpa serine carboxypeptidase S10 family protein (POPTR_0013s12840g) mRNA, complete cds	serine carboxypeptidase-like clade I	Serine carboxypeptidase-like 12 OS=Arabidopsis thaliana GN=SCPL12 PE=2 SV=1	Serine carboxypeptidase	proteolysis	serine-type carboxypeptidase activity	--
Tai6.54806	0.904676	0.822242	1.19497	2.54579	2.45788	--	--	--	6.61659	6.8888	5.65169	4.78087	6.57856	unnamed protein product [Vitis vinifera]	--	--	--	--	--	--	--
Tai6.54768	1.08454	0.801444	0.837361	0.749556	0.62839	Molecular Function:protein binding (GO:0005515)	pleiotropic regulator 1	--	52.7738	53.953	68.024	63.2658	61.4153	unnamed protein product [Coffea canephora]	PREDICTED: Sesamum indicum protein pleiotropic regulatory locus 1 (LOC105172376), mRNA	pleiotropic regulator 1	Protein pleiotropic regulator PRL2 OS=Arabidopsis thaliana GN=PRL2 PE=2 SV=2	WD domain, G-beta repeat	--	protein binding	Pleiotropic regulator 1
Tai6.54764	0.895721	0.640533	0.513195	0	0	--	COMPASS component SWD3	--	27.6326	26.4923	26.0107	29.0566	29.1382	PREDICTED: protein TOPLESS [Sesamum indicum]	Theobroma cacao TOPLESS-related 1 isoform 2 (TCM_027304) mRNA, complete cds	--	Protein TOPLESS OS=Arabidopsis thaliana GN=TPL PE=1 SV=1	ATPase proteolipid family	regulation of catalytic activity	enzyme regulator activity	--
Tai6.54757	1.00837	0.644706	0.438431	0	0	Molecular Function:methyltransferase activity (GO:0008168)	metal transporter CNNM	SAM-dependent methyltransferase	47.3887	57.7024	105.003	76.0109	77.8691	PREDICTED: probable pectin methyltransferase QUA2 [Nicotiana sylvestris]	--	--	Probable pectin methyltransferase QUA2 OS=Arabidopsis thaliana GN=QUA2 PE=1 SV=2	Methyltransferase domain//Methyltransferase small domain//Putative S-adenosyl-L-methionine-dependent methyltransferase	metabolic process	methyltransferase activity	--
Tai6.54753	0.333333	0	0.775	3.235	2.32417	--	--	--	38.8511	74.4025	73.2588	68.8431	68.7784	PREDICTED: clp protease-related protein At4g12060, chloroplastic isoform X1 [Sesamum indicum]	--	--	Clp protease-related protein At4g12060, chloroplastic OS=Arabidopsis thaliana GN=At4g12060 PE=1 SV=1	ATP dependent DNA ligase C terminal region//Clp amino terminal domain, pathogenicity island component//BED zinc finger	DNA replication//DNA recombination//protein metabolic process//DNA repair	DNA binding//DNA ligase (ATP) activity	--
Tai6.54734	1.12038	0.927772	0.930455	0.782399	1.02954	Cellular Component:membrane (GO:0016020)	ATP-binding cassette, subfamily G (WHITE), member 2, SNQ2	Uncharacterized conserved protein, tellurite resistance protein B (TerB) family	735.138	213.131	394.572	543.441	539.234	ATP-binding cassette transporter, putative [Ricinus communis]>gi|223533330|gb|EEF35082.1| ATP-binding cassette transporter, putative [Ricinus communis]	PREDICTED: Gossypium raimondii pleiotropic drug resistance protein 1-like (LOC105778108), mRNA	--	Pleiotropic drug resistance protein 1 OS=Nicotiana plumbaginifolia GN=PDR1 PE=1 SV=1	AAA domain, putative AbiEii toxin, Type IV TA system//ABC-2 type transporter	heme transport//obsolete ATP catabolic process	heme-transporting ATPase activity//ATP binding	--
Tai6.5473	1.03319	1.11864	0.949747	0.776988	0.719326	Molecular Function:GTPase activity (GO:0003924),Molecular Function:GTP binding (GO:0005525)	translation initiation factor 2 subunit 3	Translation initiation factor 2, gamma subunit (eIF-2gamma; GTPase)	44.2799	52.5224	61.1919	50.0381	48.2687	PREDICTED: eukaryotic translation initiation factor 2 subunit gamma-like isoform X3 [Musa acuminata subsp. malaccensis]>gi|695076206|ref|XP_009385380.1| PREDICTED: eukaryotic translation initiation factor 2 subunit gamma-like isoform X3 [Musa acuminata subsp. malaccensis]	PREDICTED: Nicotiana sylvestris eukaryotic translation initiation factor 2 subunit gamma-like (LOC104231338), transcript variant X2, mRNA	translation initiation factor 2 subunit 3	Eukaryotic translation initiation factor 2 subunit 3 OS=Rattus norvegicus GN=Eif2s3 PE=1 SV=2	50S ribosome-binding GTPase//Protein of unknown function, DUF258//Elongation factor Tu domain 2	--	GTP binding//GTPase activity	Translation initiation factor 2, gamma subunit (eIF-2gamma; GTPase)
Tai6.54725	0.966865	0.746531	0.552535	0	0	Molecular Function:nucleic acid binding (GO:0003676)	polyadenylate-binding protein	RNA recognition motif (RRM) domain	25.395	32.1099	22.2822	32.4771	27.4317	PREDICTED: polyadenylate-binding protein 8-like [Solanum tuberosum]	PREDICTED: Nicotiana tomentosiformis polyadenylate-binding protein 2-like (LOC104100936), transcript variant X2, mRNA	polyadenylate-binding protein	Polyadenylate-binding protein 2 OS=Arabidopsis thaliana GN=PAB2 PE=1 SV=1	RNA recognition motif. (a.k.a. RRM, RBD, or RNP domain)//RNA recognition motif	--	nucleic acid binding	Polyadenylate-binding protein (RRM superfamily)
Tai6.54702	0.968941	1.57174	1.43377	1.85362	1.72423	Biological Process:sucrose metabolic process (GO:0005985),Molecular Function:sucrose synthase activity (GO:0016157)	sucrose synthase	Glycosyltransferase involved in cell wall bisynthesis	4.39485	8.50222	1.82402	3.12813	3.65376	PREDICTED: sucrose synthase 6-like [Solanum tuberosum]	PREDICTED: Glycine max sucrose synthase 6-like (LOC100805344), mRNA	sucrose synthase	Sucrose synthase 6 OS=Arabidopsis thaliana GN=SUS6 PE=1 SV=1	Sucrose synthase	sucrose metabolic process//starch metabolic process	sucrose synthase activity	--
Tai6.54698	0.851883	0.753513	0.954865	0.963596	0.923393	--	glycyl-tRNA synthetase	Glycyl-tRNA synthetase (class II)	74.219	32.3387	64.3887	64.952	63.0772	unnamed protein product [Coffea canephora]	PREDICTED: Nicotiana tomentosiformis glycine--tRNA ligase 1, mitochondrial-like (LOC104107029), mRNA	glycyl-tRNA synthetase	Glycine--tRNA ligase, mitochondrial 1 OS=Arabidopsis thaliana GN=At1g29880 PE=1 SV=1	tRNA synthetase class II core domain (G, H, P, S and T)//TRAF-type zinc finger	tRNA aminoacylation for protein translation	nucleotide binding//zinc ion binding//ATP binding//aminoacyl-tRNA ligase activity	Glycyl-tRNA synthetase and related class II tRNA synthetase
Tai6.54666	0.333333	0	0.374309	1.55387	1.42127	Biological Process:carbohydrate metabolic process (GO:0005975)	beta-galactosidase	Beta-galactosidase GanA	55.5115	95.07	93.4573	100.255	90.2886	PREDICTED: beta-galactosidase 8 [Nicotiana tomentosiformis]>gi|697172698|ref|XP_009595285.1| PREDICTED: beta-galactosidase 8 [Nicotiana tomentosiformis]	PREDICTED: Solanum tuberosum beta-galactosidase 8-like (LOC102604796), mRNA	--	Beta-galactosidase 8 OS=Arabidopsis thaliana GN=BGAL8 PE=2 SV=2	--	--	--	--
Tai6.54651	1.33054	1.38135	1.01772	0	0	--	annexin A13	--	1.58533	1.77285	1.37337	1.00872	0.423896	PREDICTED: annexin D4 [Erythranthe guttatus]>gi|604334077|gb|EYU38266.1| hypothetical protein MIMGU_mgv1a010378mg [Erythranthe guttata]	--	annexin A13	Annexin D4 OS=Arabidopsis thaliana GN=ANN4 PE=2 SV=1	Annexin	--	calcium ion binding//calcium-dependent phospholipid binding	--
Tai6.54573	1.00893	1.15608	0.755852	0.66421	0.692213	--	transcription elongation factor SPT5	--	29.7311	39.1279	28.9824	51.7857	51.1298	PREDICTED: hornerin-like isoform X1 [Nicotiana sylvestris]>gi|698529066|ref|XP_009761361.1| PREDICTED: hornerin-like isoform X1 [Nicotiana sylvestris]	--	--	Protein RNA-directed DNA methylation 3 OS=Arabidopsis thaliana GN=RDM3 PE=1 SV=1	--	--	--	--
Tai6.54569	0.765953	0.624971	0.45197	0	0	Biological Process:metabolic process (GO:0008152),Molecular Function:hydrolase activity (GO:0016787)	gibberellin receptor GID1	Acetyl esterase/lipase	43.2666	4.38727	3.58394	7.82278	6.96293	PREDICTED: probable carboxylesterase 15 [Erythranthe guttatus]>gi|604331151|gb|EYU36009.1| hypothetical protein MIMGU_mgv1a018241mg [Erythranthe guttata]	PREDICTED: Solanum tuberosum probable carboxylesterase 15-like (LOC102593531), mRNA	--	Probable carboxylesterase 15 OS=Arabidopsis thaliana GN=CXE15 PE=2 SV=1	alpha/beta hydrolase fold//Prolyl oligopeptidase family//Chlorophyllase enzyme	proteolysis//chlorophyll metabolic process//metabolic process//chlorophyll catabolic process	hydrolase activity//chlorophyllase activity//serine-type peptidase activity	--
Tai6.54557	1.0768	1.41677	1.23152	1.22493	1.13473	Molecular Function:phosphoenolpyruvate carboxykinase (ATP) activity (GO:0004612),Molecular Function:ATP binding (GO:0005524),Biological Process:gluconeogenesis (GO:0006094)	phosphoenolpyruvate carboxykinase (ATP)	Phosphoenolpyruvate carboxykinase, ATP-dependent	238.701	195.229	340.481	262.527	626.652	PREDICTED: phosphoenolpyruvate carboxykinase [ATP]-like isoform X1 [Nicotiana tomentosiformis]	PREDICTED: Gossypium raimondii phosphoenolpyruvate carboxykinase [ATP] (LOC105787729), mRNA	phosphoenolpyruvate carboxykinase (ATP)	Phosphoenolpyruvate carboxykinase [ATP] 1 OS=Urochloa panicoides GN=PCK1 PE=1 SV=1	Phosphoenolpyruvate carboxykinase	tricarboxylic acid cycle//carbon utilization//gluconeogenesis	phosphoenolpyruvate carboxykinase (ATP) activity//ATP binding	--
Tai6.54517	1.03312	0.862491	0.983801	0	0	Molecular Function:aspartic-type endopeptidase activity (GO:0004190),Biological Process:proteolysis (GO:0006508)	phytepsin	--	31.5925	50.5789	14.0773	12.0408	11.2066	PREDICTED: aspartic proteinase [Nicotiana sylvestris]>gi|698433666|ref|XP_009797831.1| PREDICTED: aspartic proteinase [Nicotiana sylvestris]	PREDICTED: Nicotiana tomentosiformis aspartic proteinase-like (LOC104084805), mRNA	phytepsin	Aspartic proteinase OS=Cucurbita pepo PE=2 SV=1	Eukaryotic aspartyl protease	proteolysis	aspartic-type endopeptidase activity	Aspartyl protease
Tai6.54501	0.991964	1.11251	0.963526	0.766466	0.639015	--	unconventional prefoldin RPB5 interactor 1	--	8.01058	7.18024	6.70995	7.56591	11.9161	PREDICTED: RNA polymerase II subunit 5-mediating protein homolog [Solanum tuberosum]	PREDICTED: Jatropha curcas RNA polymerase II subunit 5-mediating protein homolog (LOC105646918), transcript variant X2, mRNA	unconventional prefoldin RPB5 interactor 1	RNA polymerase II subunit 5-mediating protein homolog OS=Dictyostelium discoideum GN=rmp PE=3 SV=2	Prefoldin subunit//Nucleopolyhedrovirus P10 protein//Spectrin repeat//Phage minor structural protein GP20	protein folding	unfolded protein binding//protein binding//structural molecule activity	Uncharacterized conserved protein
Tai6.545	0.927636	1.2613	0.722263	0.907903	0.84284	Biological Process:RNA methylation (GO:0001510),Biological Process:metabolic process (GO:0008152),Molecular Function:methyltransferase activity (GO:0008168),Molecular Function:O-methyltransferase activity (GO:0008171),Molecular Function:RNA methyltransferase activity (GO:0008173)	collagen, type I, alpha	2-polyprenyl-3-methyl-5-hydroxy-6-metoxy-1,4-benzoquinol methylase	2.65939	2.32157	3.28677	2.98004	3.86381	PREDICTED: small RNA 2'-O-methyltransferase-like [Nicotiana tomentosiformis]>gi|697138114|ref|XP_009623133.1| PREDICTED: small RNA 2'-O-methyltransferase-like [Nicotiana tomentosiformis]>gi|697138116|ref|XP_009623134.1| PREDICTED: small RNA 2'-O-methyltransferase-like [Nicotiana tomentosiformis]>gi|697138118|ref|XP_009623135.1| PREDICTED: small RNA 2'-O-methyltransferase-like [Nicotiana tomentosi…	PREDICTED: Nicotiana tomentosiformis small RNA 2'-O-methyltransferase-like (LOC104114395), transcript variant X4, mRNA	--	Small RNA 2'-O-methyltransferase OS=Arabidopsis thaliana GN=HEN1 PE=1 SV=1	Methyltransferase small domain//Dicer dimerisation domain//FKBP-type peptidyl-prolyl cis-trans isomerase//Methyltransferase domain	regulation of RNA metabolic process//metabolic process//protein folding	methyltransferase activity//endoribonuclease activity, producing 5'-phosphomonoesters	Uncharacterized conserved protein HEN1/CORYMBOSA2
Tai6.54493	0.773619	0.364171	0.288414	0	0	--	cycloartenol synthase	--	41.6779	48.7467	44.3506	56.5236	51.5797	PREDICTED: armadillo repeat-containing protein 8 [Solanum lycopersicum]	--	--	Armadillo repeat-containing protein 8 OS=Xenopus laevis GN=armc8 PE=2 SV=1	Armadillo/beta-catenin-like repeat//HEAT repeat	--	protein binding	--
Tai6.54486	1.1126	0.791778	0.478403	0	0	Biological Process:pseudouridine synthesis (GO:0001522),Molecular Function:RNA binding (GO:0003723),Biological Process:RNA modification (GO:0009451),Molecular Function:pseudouridine synthase activity (GO:0009982)	tRNA pseudouridine38-40 synthase	tRNA U38,U39,U40 pseudouridine synthase TruA	12.846	26.0523	20.1635	22.6175	17.8805	PREDICTED: tRNA pseudouridine synthase A, mitochondrial-like [Nicotiana tomentosiformis]	PREDICTED: Camelina sativa tRNA pseudouridine synthase A, mitochondrial-like (LOC104751505), mRNA	tRNA pseudouridine38-40 synthase	tRNA pseudouridine synthase A, mitochondrial OS=Mus musculus GN=Pus1 PE=1 SV=2	Region in Clathrin and VPS//tRNA pseudouridine synthase//BTB/POZ domain	vesicle-mediated transport//RNA modification//pseudouridine synthesis//intracellular protein transport	protein binding//RNA binding//pseudouridine synthase activity	Pseudouridylate synthase
Tai6.54420	0.921649	1.32745	1.71819	1.04343	1.17409	Molecular Function:glutathione peroxidase activity (GO:0004602),Biological Process:response to oxidative stress (GO:0006979),Biological Process:oxidation-reduction process (GO:0055114)	glutathione peroxidase	Glutathione peroxidase, house-cleaning role in reducing lipid peroxides	281.374	242.192	268.958	165.743	182.942	glutathione peroxidase [Ipomoea batatas]	Ipomoea batatas glutathione peroxidase (GPX) mRNA, complete cds	glutathione peroxidase	Probable phospholipid hydroperoxide glutathione peroxidase OS=Mesembryanthemum crystallinum GN=GPXMC1 PE=2 SV=1	Glutathione peroxidase	response to oxidative stress//glutathione metabolic process//oxidation-reduction process//obsolete peroxidase reaction	glutathione peroxidase activity	--
Tai6.54413	1.05034	1.32858	1.21076	1.29602	1.3065	Molecular Function:3-dehydroquinate dehydratase activity (GO:0003855),Molecular Function:shikimate 3-dehydrogenase (NADP+) activity (GO:0004764),Biological Process:oxidation-reduction process (GO:0055114)	--	3-dehydroquinate dehydratase	57.0255	32.5446	46.2606	46.4653	39.6327	PREDICTED: bifunctional 3-dehydroquinate dehydratase/shikimate dehydrogenase, chloroplastic-like isoform X2 [Nicotiana tomentosiformis]	PREDICTED: Gossypium raimondii bifunctional 3-dehydroquinate dehydratase/shikimate dehydrogenase, chloroplastic (LOC105798841), mRNA	3-dehydroquinate dehydratase / shikimate dehydrogenase	Bifunctional 3-dehydroquinate dehydratase/shikimate dehydrogenase, chloroplastic OS=Arabidopsis thaliana GN=EMB3004 PE=1 SV=1	Type I 3-dehydroquinase//Shikimate dehydrogenase substrate binding domain	tryptophan biosynthetic process//oxidation-reduction process//L-phenylalanine biosynthetic process//tyrosine biosynthetic process	3-dehydroquinate dehydratase activity//shikimate 3-dehydrogenase (NADP+) activity	Pentafunctional AROM protein
Tai6.54353	1.24779	0.816288	0.461174	0	0	Biological Process:nitrogen compound metabolic process (GO:0006807)	--	Predicted amidohydrolase	54.8568	63.5614	61.2387	71.9062	71.9415	PREDICTED: bifunctional nitrilase/nitrile hydratase NIT4A-like [Glycine max]	--	beta-cyano-L-alanine hydratase/nitrilase	Bifunctional nitrilase/nitrile hydratase NIT4A OS=Lupinus angustifolius GN=NIT4A PE=1 SV=1	Carbon-nitrogen hydrolase	nitrogen compound metabolic process	hydrolase activity, acting on carbon-nitrogen (but not peptide) bonds	Carbon-nitrogen hydrolase
Tai6.54307	0.787554	0.728422	0.760468	1.11778	1.08797	Molecular Function:small protein activating enzyme activity (GO:0008641)	ubiquitin-activating enzyme E1	Molybdopterin or thiamine biosynthesis adenylyltransferase	42.8271	48.787	46.6667	47.7326	45.249	PREDICTED: ubiquitin-activating enzyme E1 1-like [Nicotiana tomentosiformis]	PREDICTED: Nicotiana tomentosiformis ubiquitin-activating enzyme E1 1-like (LOC104113235), mRNA	ubiquitin-activating enzyme E1	Ubiquitin-activating enzyme E1 2 OS=Triticum aestivum GN=UBA2 PE=2 SV=1	ThiF family	--	small protein activating enzyme activity	Ubiquitin activating enzyme UBA1
Tai6.54292	1.01469	1.139	0.905363	0.838556	0.889287	Molecular Function:GMP synthase (glutamine-hydrolyzing) activity (GO:0003922),Molecular Function:ATP binding (GO:0005524),Biological Process:purine nucleotide biosynthetic process (GO:0006164),Biological Process:GMP biosynthetic process (GO:0006177)	GMP synthase (glutamine-hydrolysing)	GMP synthase, PP-ATPase domain/subunit	95.372	89.1731	107.283	113.555	82.6703	PREDICTED: GMP synthase [glutamine-hydrolyzing] [Solanum lycopersicum]	PREDICTED: Nicotiana sylvestris GMP synthase [glutamine-hydrolyzing] (LOC104216278), mRNA	GMP synthase (glutamine-hydrolysing)	GMP synthase [glutamine-hydrolyzing] OS=Bradyrhizobium diazoefficiens (strain JCM 10833 / IAM 13628 / NBRC 14792 / USDA 110) GN=guaA PE=3 SV=1	GMP synthase C terminal domain	glutamate metabolic process//purine nucleobase metabolic process//purine nucleotide biosynthetic process//GMP biosynthetic process	GMP synthase (glutamine-hydrolyzing) activity//ATP binding	GMP synthase
Tai6.54266	1.12082	0.631382	0.385993	0	0	Molecular Function:microtubule motor activity (GO:0003777),Molecular Function:ATP binding (GO:0005524),Biological Process:microtubule-based movement (GO:0007018),Molecular Function:microtubule binding (GO:0008017)	kinesin family member C2/C3	--	19.5365	31.6334	35.5343	37.4861	46.5448	PREDICTED: kinesin-like calmodulin-binding protein [Nicotiana sylvestris]>gi|698570035|ref|XP_009774494.1| PREDICTED: kinesin-like calmodulin-binding protein [Nicotiana sylvestris]>gi|698570040|ref|XP_009774495.1| PREDICTED: kinesin-like calmodulin-binding protein [Nicotiana sylvestris]>gi|698570043|ref|XP_009774496.1| PREDICTED: kinesin-like calmodulin-binding protein [Nicotiana sylvestris]	PREDICTED: Nicotiana sylvestris kinesin-like calmodulin-binding protein (LOC104224515), transcript variant X4, mRNA	--	Kinesin-like calmodulin-binding protein OS=Arabidopsis thaliana GN=KCBP PE=1 SV=1	Vacuolar sorting 38 and autophagy-related subunit 14//Autophagy protein Apg6//FemAB family//Nucleopolyhedrovirus P10 protein//Type II/IV secretion system protein//Fusaric acid resistance protein family//Kinesin motor domain	peptidoglycan biosynthetic process//positive regulation of autophagy//autophagy//transport//microtubule-based process//microtubule-based movement	transferase activity, transferring amino-acyl groups//microtubule binding//microtubule motor activity//ATP binding	Kinesin (KAR3 subfamily)
Tai6.54220	0.95902	1.41741	1.4743	1.04506	1.34091	--	transketolase	Transketolase	173.544	141.225	128.252	112.996	110.206	PREDICTED: transketolase, chloroplastic [Solanum lycopersicum]	PREDICTED: Nicotiana sylvestris transketolase, chloroplastic (LOC104230044), mRNA	transketolase	Transketolase, chloroplastic OS=Solanum tuberosum PE=2 SV=1	--	--	--	Transketolase
Tai6.5422	1.06705	1.15265	1.07164	0.606582	0.793568	Molecular Function:protein binding (GO:0005515)	large subunit ribosomal protein L35e	--	4.49273	7.40544	10.1028	16.5835	14.2382	PREDICTED: uncharacterized protein LOC102593671 isoform X1 [Solanum tuberosum]>gi|565403894|ref|XP_006367387.1| PREDICTED: uncharacterized protein LOC102593671 isoform X2 [Solanum tuberosum]	--	--	protein SLOW GREEN 1, chloroplastic OS=Arabidopsis thaliana GN=SG1 PE=1 SV=1	Ephrin receptor ligand binding domain	ephrin receptor signaling pathway	--	--
Tai6.54217	0.801023	0.81664	0.910576	0.980412	1.06117	Molecular Function:protein kinase activity (GO:0004672),Molecular Function:ATP binding (GO:0005524),Biological Process:protein phosphorylation (GO:0006468)	interleukin-1 receptor-associated kinase 1	Serine/threonine protein kinase	4.60631	13.4679	10.8241	12.1459	19.3335	PREDICTED: probable inactive receptor kinase At1g48480 [Sesamum indicum]	PREDICTED: Nicotiana tomentosiformis probable inactive receptor kinase RLK902 (LOC104089371), mRNA	--	Probable inactive receptor kinase At1g48480 OS=Arabidopsis thaliana GN=RKL1 PE=2 SV=1	Protein kinase domain//Protein tyrosine kinase	protein phosphorylation	ATP binding//protein kinase activity	--
Tai6.54199	1.04356	1.19078	0.851392	0.850095	0.790406	--	--	--	18.9083	15.9965	16.4559	14.3757	16.6403	PREDICTED: uncharacterized protein LOC104244654 [Nicotiana sylvestris]	--	--	--	--	--	--	--
Tai6.54198	0.825774	0.615071	0.700793	0.75	0.765269	Biological Process:lipid metabolic process (GO:0006629),Molecular Function:O-acyltransferase activity (GO:0008374)	phospholipid:diacylglycerol acyltransferase	--	46.2963	59.8038	42.8721	67.2936	53.9864	PREDICTED: phospholipid:diacylglycerol acyltransferase 1-like [Sesamum indicum]>gi|747052869|ref|XP_011072567.1| PREDICTED: phospholipid:diacylglycerol acyltransferase 1-like [Sesamum indicum]>gi|747052871|ref|XP_011072568.1| PREDICTED: phospholipid:diacylglycerol acyltransferase 1-like [Sesamum indicum]	PREDICTED: Nicotiana tomentosiformis phospholipid:diacylglycerol acyltransferase 1-like (LOC104097532), mRNA	phospholipid:diacylglycerol acyltransferase	Phospholipid:diacylglycerol acyltransferase 1 OS=Arabidopsis thaliana GN=PDAT1 PE=2 SV=1	Lecithin:cholesterol acyltransferase	lipid metabolic process//acyl-carrier-protein biosynthetic process	O-acyltransferase activity	Lecithin:cholesterol acyltransferase (LCAT)/Acyl-ceramide synthase
Tai6.54188	1.26186	0.753954	0.327768	0	0	Cellular Component:1,3-beta-D-glucan synthase complex (GO:0000148),Molecular Function:1,3-beta-D-glucan synthase activity (GO:0003843),Biological Process:(1->3)-beta-D-glucan biosynthetic process (GO:0006075),Cellular Component:membrane (GO:0016020)	callose synthase	--	9.24952	15.104	12.2757	11.5785	10.2906	PREDICTED: callose synthase 7-like [Nicotiana sylvestris]	Eutrema salsugineum hypothetical protein (EUTSA_v10005734mg) mRNA, complete cds	callose synthase	Putative callose synthase 6 OS=Arabidopsis thaliana GN=CALS6 PE=3 SV=2	1,3-beta-glucan synthase component	(1->3)-beta-D-glucan biosynthetic process//starch metabolic process//sucrose metabolic process	1,3-beta-D-glucan synthase activity	--
Tai6.54173	1.11033	1.31135	0.71967	0	0	--	multisite-specific tRNA:(cytosine-C5)-methyltransferase	--	15.0224	14.4157	19.9679	12.3786	11.3854	PREDICTED: tRNA (cytosine(34)-C(5))-methyltransferase [Solanum lycopersicum]	--	multisite-specific tRNA:(cytosine-C5)-methyltransferase	--	--	--	--	--
Tai6.5416	1.0869	1.08655	0.929541	1.01221	0.714924	Molecular Function:nucleic acid binding (GO:0003676)	heterogeneous nuclear ribonucleoprotein F/H	--	1.75311	2.14815	1.88634	0.635364	1.37796	PREDICTED: heterogeneous nuclear ribonucleoprotein H2 isoform X1 [Nicotiana sylvestris]	PREDICTED: Nicotiana sylvestris heterogeneous nuclear ribonucleoprotein H2 (LOC104223479), transcript variant X1, mRNA	heterogeneous nuclear ribonucleoprotein F/H	Heterogeneous nuclear ribonucleoprotein F OS=Homo sapiens GN=HNRNPF PE=1 SV=3	RNA recognition motif. (a.k.a. RRM, RBD, or RNP domain)	--	nucleic acid binding	Splicing factor hnRNP-F and related RNA-binding proteins
Tai6.54158	0.863081	0.692388	0.522993	0	0	Biological Process:metabolic process (GO:0008152)	acetyl-CoA C-acetyltransferase	Acetyl-CoA acetyltransferase	28.8697	18.4761	19.5591	21.7549	20.8535	PREDICTED: probable acetyl-CoA acetyltransferase, cytosolic 2 [Solanum lycopersicum]	PREDICTED: Solanum lycopersicum probable acetyl-CoA acetyltransferase, cytosolic 2 (LOC101256172), mRNA	acetyl-CoA C-acetyltransferase	Acetyl-CoA acetyltransferase, cytosolic 1 OS=Arabidopsis thaliana GN=AAT1 PE=2 SV=1	Thiolase, N-terminal domain	metabolic process	transferase activity, transferring acyl groups other than amino-acyl groups	Acetyl-CoA acetyltransferase
Tai6.54145	1.09413	1.29666	1.35147	1.46109	1.32164	--	--	--	22.6095	32.0408	26.9347	41.6669	35.9317	PREDICTED: myosin-9 [Nicotiana tomentosiformis]	--	--	--	GTPase-activator protein for Ras-like GTPase//TPR/MLP1/MLP2-like protein//DMPK coiled coil domain like	serine family amino acid metabolic process//protein import into nucleus//protein phosphorylation//regulation of GTPase activity//phosphorylation	protein serine/threonine kinase activity//ATP binding	--
Tai6.54143	1.16618	1.00064	0.404372	0	0	--	uncharacterized protein	Predicted N-acyltransferase	2.06629	1.4368	2.35886	0.503198	0.94182	PREDICTED: uncharacterized protein LOC100808838 [Glycine max]	Arabidopsis lyrata subsp. lyrata hypothetical protein, mRNA	uncharacterized protein	--	--	--	--	--
Tai6.54142	1.0043	1.26173	0.86278	0.777595	0.821252	--	methylenetetrahydrofolate reductase (NADPH)	--	105.468	54.0511	49.4863	29.3431	25.9312	PREDICTED: methylenetetrahydrofolate reductase 2-like [Solanum lycopersicum]	PREDICTED: Glycine max probable methylenetetrahydrofolate reductase-like (LOC100782073), mRNA	methylenetetrahydrofolate reductase (NADPH)	Probable methylenetetrahydrofolate reductase OS=Oryza sativa subsp. japonica GN=Os03g0815200 PE=2 SV=1	--	--	--	5,10-methylenetetrahydrofolate reductase
Tai6.54129	0.768762	1.59429	0.684571	0	0	Biological Process:metabolic process (GO:0008152),Molecular Function:oxidoreductase activity (GO:0016491),Biological Process:oxidation-reduction process (GO:0055114)	betaine-aldehyde dehydrogenase	Acyl-CoA reductase or other NAD-dependent aldehyde dehydrogenase	32.818	47.9712	33.7174	53.3112	37.9224	aminoaldehyde dehydrogenase 2 [Nicotiana tabacum]	Ipomoea batatas glycine betaine aldehyde dehydrogenase mRNA, partial cds	betaine-aldehyde dehydrogenase	Betaine aldehyde dehydrogenase, chloroplastic OS=Spinacia oleracea PE=1 SV=1	Aldehyde dehydrogenase family	oxidation-reduction process//metabolic process	oxidoreductase activity	Aldehyde dehydrogenase
Tai6.54115	0.737072	0.69055	0.233645	0	0	Biological Process:ATP metabolic process (GO:0046034)	V-type H+-transporting ATPase subunit A	Archaeal/vacuolar-type H+-ATPase catalytic subunit A/Vma1	14.8711	24.0074	23.4956	26.5422	29.9144	vacuolar H+-ATPase A1 subunit isoform [Solanum lycopersicum]>gi|27883932|gb|AAO23980.1| vacuolar H+-ATPase A1 subunit isoform [Solanum lycopersicum]	PREDICTED: Solanum tuberosum V-type proton ATPase catalytic subunit A-like (LOC102582778), mRNA	V-type H+-transporting ATPase subunit A	V-type proton ATPase catalytic subunit A OS=Arabidopsis thaliana GN=VHA-A PE=1 SV=1	ATP synthase alpha/beta chain, C terminal domain	oxidative phosphorylation//ATP metabolic process//proton transport//ATP synthesis coupled proton transport//ATP hydrolysis coupled proton transport	proton-transporting ATP synthase activity, rotational mechanism//hydrolase activity, acting on acid anhydrides, catalyzing transmembrane movement of substances//proton-transporting ATPase activity, rotational mechanism//ATP binding	Vacuolar H+-ATPase V1 sector, subunit A
Tai6.54100	1.04517	1.12568	1.06968	1.08052	0.989082	Biological Process:metabolic process (GO:0008152),Molecular Function:NAD binding (GO:0051287),Biological Process:oxidation-reduction process (GO:0055114)	D-3-phosphoglycerate dehydrogenase	Phosphoglycerate dehydrogenase or related dehydrogenase	57.1969	61.3661	106.781	77.7987	135.312	PREDICTED: D-3-phosphoglycerate dehydrogenase, chloroplastic [Cucumis melo]	PREDICTED: Elaeis guineensis D-3-phosphoglycerate dehydrogenase 3, chloroplastic-like (LOC105049537), mRNA	D-3-phosphoglycerate dehydrogenase	D-3-phosphoglycerate dehydrogenase 3, chloroplastic OS=Arabidopsis thaliana GN=PGDH3 PE=1 SV=1	D-isomer specific 2-hydroxyacid dehydrogenase, catalytic domain//D-isomer specific 2-hydroxyacid dehydrogenase, NAD binding domain	metabolic process//oxidation-reduction process	NAD binding//oxidoreductase activity, acting on the CH-OH group of donors, NAD or NADP as acceptor	D-3-phosphoglycerate dehydrogenase, D-isomer-specific 2-hydroxy acid dehydrogenase superfamily
Tai6.5408	1.0247	0.571044	0.360968	0	0	Molecular Function:copper ion binding (GO:0005507),Molecular Function:oxidoreductase activity (GO:0016491),Biological Process:oxidation-reduction process (GO:0055114)	laccase	Multicopper oxidase with three cupredoxin domains (includes cell division protein FtsP and spore coat protein CotA)	46.2357	6.84664	0.50778	0.199465	0.525748	PREDICTED: laccase-3-like [Nicotiana sylvestris]	PREDICTED: Solanum tuberosum laccase-3-like (LOC102590317), mRNA	laccase	Laccase-3 OS=Arabidopsis thaliana GN=LAC3 PE=2 SV=2	Multicopper oxidase//Multicopper oxidase//Multicopper oxidase	oxidation-reduction process	copper ion binding//oxidoreductase activity	--
Tai6.54033	0.75274	0.770115	1.00375	1.65302	1.5229	Molecular Function:ATP binding (GO:0005524),Biological Process:transport (GO:0006810),Cellular Component:integral component of membrane (GO:0016021),Biological Process:transmembrane transport (GO:0055085)	ATP-binding cassette, subfamily C (CFTR/MRP), member 2	ABC-type multidrug transport system, ATPase and permease component	224.923	77.7618	85.1542	71.3222	101.802	PREDICTED: ABC transporter C family member 2-like [Nicotiana tomentosiformis]>gi|697150736|ref|XP_009629578.1| PREDICTED: ABC transporter C family member 2-like [Nicotiana tomentosiformis]>gi|697150738|ref|XP_009629579.1| PREDICTED: ABC transporter C family member 2-like [Nicotiana tomentosiformis]>gi|697150740|ref|XP_009629580.1| PREDICTED: ABC transporter C family member 2-like [Nicotiana tomen…	PREDICTED: Nicotiana tomentosiformis ABC transporter C family member 2-like (LOC104119710), transcript variant X5, mRNA	--	ABC transporter C family member 2 OS=Arabidopsis thaliana GN=ABCC2 PE=1 SV=2	ABC transporter transmembrane region//Protein of unknown function (DUF805)	transport//transmembrane transport	ATP binding//ATPase activity, coupled to transmembrane movement of substances	Multidrug resistance-associated protein/mitoxantrone resistance protein, ABC superfamily
Tai6.540	1.08974	1.20103	2.14619	0.902733	1.26979	Biological Process:carbohydrate metabolic process (GO:0005975)	alpha-glucosidase	Alpha-glucosidase, glycosyl hydrolase family GH31	7.56368	11.4645	6.85559	12.0123	8.29459	PREDICTED: alpha-glucosidase-like [Nicotiana tomentosiformis]	PREDICTED: Solanum tuberosum alpha-glucosidase-like (LOC102597879), mRNA	alpha-glucosidase	Alpha-glucosidase OS=Spinacia oleracea PE=1 SV=1	Glycosyl hydrolases family 31	carbohydrate metabolic process	hydrolase activity, hydrolyzing O-glycosyl compounds	Maltase glucoamylase and related hydrolases, glycosyl hydrolase family 31
Tai6.5396	0.964208	0.915344	0.610333	0	0	Molecular Function:protein binding (GO:0005515),Cellular Component:anaphase-promoting complex (GO:0005680),Biological Process:regulation of mitotic metaphase/anaphase transition (GO:0030071),Biological Process:anaphase-promoting complex-dependent catabolic process (GO:0031145)	anaphase-promoting complex subunit 4	WD40 repeat	9.27114	14.6968	14.3826	10.2996	17.1498	PREDICTED: anaphase-promoting complex subunit 4 [Populus euphratica]	--	anaphase-promoting complex subunit 4	Anaphase-promoting complex subunit 4 OS=Arabidopsis thaliana GN=APC4 PE=2 SV=2	WD domain, G-beta repeat//Coatomer WD associated region	vesicle-mediated transport//intracellular protein transport	structural molecule activity//protein binding	Anaphase-promoting complex (APC), subunit 4
Tai6.53925	0.333333	0	0.403935	1.09684	1.25193	Molecular Function:catalytic activity (GO:0003824),Biological Process:carbohydrate metabolic process (GO:0005975)	1,4-alpha-glucan branching enzyme	1,4-alpha-glucan branching enzyme	7.95323	67.8155	72.3053	54.6121	76.6714	starch branching enzyme [Ipomoea batatas]	Ipomoea batatas SBE II mRNA for starch branching enzyme II, complete cds	1,4-alpha-glucan branching enzyme	1,4-alpha-glucan-branching enzyme 1, chloroplastic/amyloplastic OS=Pisum sativum GN=SBEI PE=1 SV=1	Alpha amylase, catalytic domain	carbohydrate metabolic process	cation binding//catalytic activity	1,4-alpha-glucan branching enzyme/starch branching enzyme II
Tai6.53915	1.0737	0.949749	1.12183	1.35242	1.57309	Molecular Function:iron ion binding (GO:0005506),Molecular Function:heme binding (GO:0020037),Biological Process:oxidation-reduction process (GO:0055114)	--	Cytochrome P450	13.1017	88.1029	56.0092	34.7368	35.8177	CYP71D48v1 [Nicotiana tabacum]	--	--	Premnaspirodiene oxygenase OS=Hyoscyamus muticus GN=CYP71D55 PE=1 SV=1	Cytochrome P450	oxidation-reduction process	oxidoreductase activity, acting on paired donors, with incorporation or reduction of molecular oxygen//iron ion binding//heme binding	--
Tai6.5391	0.781365	1.02719	0.822329	1.00814	0.897461	Molecular Function:calmodulin binding (GO:0005516),Biological Process:response to stress (GO:0006950)	--	--	0.791879	0.913457	0.515365	0.214394	0.4027	PREDICTED: uncharacterized protein LOC104086953 [Nicotiana tomentosiformis]	PREDICTED: Nicotiana sylvestris uncharacterized LOC104241635 (LOC104241635), mRNA	--	Calmodulin-binding protein 60 B OS=Arabidopsis thaliana GN=CBP60B PE=2 SV=1	Domain of unknown function (DUF4664)//Calmodulin binding protein-like	circadian regulation of gene expression//response to stress	calmodulin binding//transcription regulatory region sequence-specific DNA binding	--
Tai6.53880	1.45058	0.589789	0.334224	0	0	--	--	--	91.2566	70.6705	67.0575	80.8802	76.8134	PREDICTED: protein SHOOT GRAVITROPISM 6 [Nicotiana sylvestris]	PREDICTED: Solanum tuberosum maestro heat-like repeat-containing protein family member 1-like (LOC102585399), mRNA	--	Protein SHOOT GRAVITROPISM 6 OS=Arabidopsis thaliana GN=SGR6 PE=2 SV=1	Colipase, N-terminal domain	lipid catabolic process//digestion	enzyme activator activity	--
Tai6.53878	1.18139	0.859962	0.82174	4.57636	0.607195	--	--	--	0.138676	0.403506	0.142113	0.552956	0.110595	PREDICTED: golgin candidate 6-like isoform X1 [Solanum tuberosum]>gi|565354077|ref|XP_006343944.1| PREDICTED: golgin candidate 6-like isoform X2 [Solanum tuberosum]	PREDICTED: Nicotiana tomentosiformis golgin candidate 6 (LOC104115370), mRNA	--	Golgin candidate 6 OS=Arabidopsis thaliana GN=GC6 PE=1 SV=2	--	--	--	ER-Golgi vesicle-tethering protein p115
Tai6.53838	0.858657	0.633451	0.630929	0.732343	0.781079	Molecular Function:oxidoreductase activity (GO:0016491),Biological Process:oxidation-reduction process (GO:0055114)	aldehyde reductase	Aldo/keto reductase, related to diketogulonate reductase	101.568	19.7383	37.6081	5.00906	9.61954	hypothetical protein EUTSA_v10016962mg [Eutrema salsugineum]>gi|557112137|gb|ESQ52421.1| hypothetical protein EUTSA_v10016962mg [Eutrema salsugineum]	PREDICTED: Brassica rapa aldo-keto reductase family 4 member C9-like (LOC103857735), mRNA	--	Aldo-keto reductase family 4 member C9 OS=Arabidopsis thaliana GN=AKR4C9 PE=1 SV=1	--	--	--	Aldo/keto reductase family proteins
Tai6.53820	0.333333	0	0.431738	1.5164	1.26463	Biological Process:transmembrane transport (GO:0055085)	solute carrier family 25 (mitochondrial phosphate transporter), member 23/24/25/41	--	28.8661	35.3221	34.0489	33.8098	35.8624	PREDICTED: mitochondrial adenine nucleotide transporter ADNT1 isoform X1 [Solanum lycopersicum]	--	solute carrier family 25 (mitochondrial phosphate transporter), member 23/24/25/41	Mitochondrial adenine nucleotide transporter ADNT1 OS=Arabidopsis thaliana GN=ADNT1 PE=2 SV=1	--	--	--	--
Tai6.53792	0.960199	3.19261	1.53376	0	0	--	H/ACA ribonucleoprotein complex subunit 2	Ribosomal protein L7Ae or related RNA K-turn-binding protein	14.7491	12.1847	15.7582	8.78855	8.43502	PREDICTED: H/ACA ribonucleoprotein complex subunit 2-like protein [Nicotiana sylvestris]	PREDICTED: Nicotiana sylvestris H/ACA ribonucleoprotein complex subunit 2-like protein (LOC104217899), mRNA	H/ACA ribonucleoprotein complex subunit 2	H/ACA ribonucleoprotein complex subunit 2-like protein OS=Arabidopsis thaliana GN=At5g08180 PE=1 SV=1	--	--	--	Box H/ACA snoRNP component, involved in ribosomal RNA pseudouridinylation
Tai6.53788	0.621686	0.524045	0.688676	1.21771	1.17053	--	spermidine synthase	Spermidine synthase	12.7642	28.6427	22.9725	28.093	19.5749	spermine synthase [Ipomoea batatas]	Ipomoea batatas mRNA for spermine synthase (Spms gene), cultivar Abees	spermidine synthase	Spermine synthase OS=Arabidopsis thaliana GN=SPMS PE=1 SV=1	--	--	--	Spermidine synthase
Tai6.5377	1.26859	0.353466	0.668437	1.74914	1.4084	--	transcription factor TCP21 (protein CCA1 HIKING EXPEDITION)	--	26.9231	24.2618	23.8522	30.042	24.0552	PREDICTED: transcription factor TCP8-like [Nicotiana sylvestris]	PREDICTED: Erythranthe guttatus transcription factor TCP8-like (LOC105970156), mRNA	--	Transcription factor TCP8 OS=Arabidopsis thaliana GN=TCP8 PE=1 SV=1	--	--	--	--
Tai6.53768	0.65087	0.919946	0.571084	0	0	Molecular Function:protein kinase activity (GO:0004672),Molecular Function:ATP binding (GO:0005524),Biological Process:protein phosphorylation (GO:0006468)	interleukin-1 receptor-associated kinase 1	Ankyrin repeat	31.9787	37.2525	18.5443	34.2397	30.282	PREDICTED: probable inactive receptor kinase At5g67200 [Solanum lycopersicum]	--	--	Probable inactive receptor kinase At5g67200 OS=Arabidopsis thaliana GN=At5g67200 PE=1 SV=1	Protein kinase domain//DNL zinc finger//Protein tyrosine kinase	protein phosphorylation	ATP binding//protein kinase activity//zinc ion binding	--
Tai6.53762	1.05865	1.15367	1.08169	0.836294	0.874186	Biological Process:proteolysis (GO:0006508),Molecular Function:metallopeptidase activity (GO:0008237),Molecular Function:zinc ion binding (GO:0008270)	puromycin-sensitive aminopeptidase	Aminopeptidase N	52.8933	46.5364	44.3371	62.8234	57.519	unnamed protein product [Coffea canephora]	PREDICTED: Solanum tuberosum puromycin-sensitive aminopeptidase-like (LOC102600594), mRNA	puromycin-sensitive aminopeptidase	Aminopeptidase M1 OS=Arabidopsis thaliana GN=APM1 PE=1 SV=1	Peptidase family M1	--	metallopeptidase activity//zinc ion binding	Puromycin-sensitive aminopeptidase and related aminopeptidases
Tai6.53720	0.816614	1.27279	1.09146	1.11221	1.13282	Molecular Function:aspartic-type endopeptidase activity (GO:0004190),Biological Process:proteolysis (GO:0006508)	DNA damage-inducible protein 1	--	34.7598	20.8681	26.4621	35.5803	22.8665	hypothetical protein CICLE_v10008478mg [Citrus clementina]>gi|568841703|ref|XP_006474797.1| PREDICTED: DNA damage-inducible protein 1-like [Citrus sinensis]>gi|557555940|gb|ESR65954.1| hypothetical protein CICLE_v10008478mg [Citrus clementina]	PREDICTED: Nicotiana sylvestris DNA damage-inducible protein 1 (LOC104211236), transcript variant X2, mRNA	DNA damage-inducible protein 1	DNA damage-inducible protein 1 OS=Phaeosphaeria nodorum (strain SN15 / ATCC MYA-4574 / FGSC 10173) GN=DDI1 PE=3 SV=2	Aspartyl protease	proteolysis	aspartic-type endopeptidase activity	DNA damage inducible protein
Tai6.537	0.888595	0.848031	0.928906	1.0887	1.07955	Biological Process:metabolic process (GO:0008152),Molecular Function:oxidoreductase activity (GO:0016491),Biological Process:oxidation-reduction process (GO:0055114)	1-pyrroline-5-carboxylate dehydrogenase	Acyl-CoA reductase or other NAD-dependent aldehyde dehydrogenase	20.6189	14.9677	16.0904	18.2204	17.8065	P5CDH1 [Actinidia chinensis]	PREDICTED: Nicotiana tomentosiformis delta-1-pyrroline-5-carboxylate dehydrogenase 12A1, mitochondrial (LOC104094076), mRNA	1-pyrroline-5-carboxylate dehydrogenase	Probable aldehyde dehydrogenase OS=Linum usitatissimum GN=FIS1 PE=2 SV=1	Aldehyde dehydrogenase family	metabolic process//oxidation-reduction process	oxidoreductase activity	--
Tai6.53692	1.16359	0.516154	0.557172	0.316868	0.45569	--	phospholipid:diacylglycerol acyltransferase	Phospholipase/lecithinase/hemolysin	0	0	0.0924941	0	0.146606	PREDICTED: GDSL esterase/lipase At5g03610-like [Nicotiana tomentosiformis]	--	--	GDSL esterase/lipase At5g03610 OS=Arabidopsis thaliana GN=At5g03610 PE=2 SV=1	GDSL-like Lipase/Acylhydrolase	--	hydrolase activity, acting on ester bonds	--
Tai6.53668	0.753544	1.09412	0.565611	0	0	--	guanine nucleotide-binding protein G(I)/G(S)/G(T) subunit beta-1	--	33.7301	63.3799	50.651	41.8404	45.754	PREDICTED: guanine nucleotide-binding protein subunit beta [Sesamum indicum]	PREDICTED: Erythranthe guttatus guanine nucleotide-binding protein subunit beta-2 (LOC105957644), mRNA	guanine nucleotide-binding protein G(I)/G(S)/G(T) subunit beta-1	Guanine nucleotide-binding protein subunit beta-1 OS=Nicotiana tabacum PE=1 SV=1	--	--	--	--
Tai6.53655	1.07754	1.19574	1.23926	1.52156	1.38201	Molecular Function:protein binding (GO:0005515),Cellular Component:proteasome regulatory particle (GO:0005838)	26S proteasome regulatory subunit N8	--	0.154643	0.166085	0.106845	0.108513	0.0555979	PREDICTED: 26S proteasome non-ATPase regulatory subunit 7 homolog A [Nicotiana tomentosiformis]	PREDICTED: Sesamum indicum 26S proteasome non-ATPase regulatory subunit 7 homolog A (LOC105167071), mRNA	26S proteasome regulatory subunit N8	26S proteasome non-ATPase regulatory subunit 7 homolog A OS=Arabidopsis thaliana GN=RPN8A PE=1 SV=1	DNA binding protein S1FA//JAB1/Mov34/MPN/PAD-1 ubiquitin protease	regulation of transcription, DNA-templated	protein binding//DNA binding	26S proteasome regulatory complex, subunit RPN8/PSMD7
Tai6.53636	1.14721	0.497646	0.663079	0.914491	0.826583	--	--	--	87.0428	93.3385	90.1121	92.8945	94.668	PREDICTED: uncharacterized protein LOC101261352 isoform X1 [Solanum lycopersicum]	PREDICTED: Cicer arietinum binding partner of ACD11 1 (LOC101513427), mRNA	--	Binding partner of ACD11 1 OS=Arabidopsis thaliana GN=BPA1 PE=1 SV=1	--	--	--	--
Tai6.53624	1.0013	0.98374	0.616585	0	0	--	proline-, glutamic acid- and leucine-rich protein 1	--	7.19333	11.916	17.2037	18.1913	12.8261	PREDICTED: proline-, glutamic acid- and leucine-rich protein 1 isoform X2 [Nicotiana sylvestris]	Vitis vinifera, whole genome shotgun sequence, contig VV78X250398.2, clone ENTAV 115	--	Proline-, glutamic acid- and leucine-rich protein 1 OS=Mus musculus GN=Pelp1 PE=1 SV=2	--	--	--	--
Tai6.536	1.16489	0.716608	0.483156	0	0	--	--	--	11.4861	25.9688	7.44127	26.5681	30.017	PREDICTED: uncharacterized protein LOC104248177 [Nicotiana sylvestris]	--	--	--	--	--	--	--
Tai6.53598	0.944218	0.706395	0.526259	0	0	--	--	--	16.1462	20.3035	17.0009	16.8497	18.4253	PREDICTED: WPP domain-interacting protein 2 [Nicotiana tomentosiformis]>gi|697132355|ref|XP_009620225.1| PREDICTED: WPP domain-interacting protein 2 [Nicotiana tomentosiformis]	--	--	WPP domain-interacting protein 3 OS=Arabidopsis thaliana GN=WIP3 PE=1 SV=1	Somatotropin hormone family	signal transduction	hormone activity	--
Tai6.53574	0.960868	0.742645	0.992863	1.76656	1.56626	Molecular Function:RNA binding (GO:0003723)	lupus La protein	--	72.7389	90.3636	97.7585	82.1716	90.0837	PREDICTED: la protein 1 [Sesamum indicum]	--	lupus La protein	--	RNA binding motif	--	RNA binding	--
Tai6.53572	0.871685	1.09928	1.32568	1.20604	1.29498	Biological Process:carbohydrate metabolic process (GO:0005975)	phosphoglucomutase	Phosphoglucomutase	12.9703	274.826	378.692	519.953	472.77	PREDICTED: phosphoglucomutase, chloroplastic [Solanum lycopersicum]	PREDICTED: Solanum lycopersicum phosphoglucomutase, chloroplastic (LOC101267287), mRNA	phosphoglucomutase	Phosphoglucomutase, chloroplastic OS=Solanum tuberosum GN=PGMP PE=2 SV=1	Phosphoglucomutase/phosphomannomutase, alpha/beta/alpha domain I	carbohydrate metabolic process	intramolecular transferase activity, phosphotransferases	Phosphoglucomutase
Tai6.5353	1.0372	0.988082	1.25839	1.3201	1.26055	Molecular Function:phosphomevalonate kinase activity (GO:0004631)	phosphomevalonate kinase	--	7.91231	7.01951	8.43781	9.59208	10.0812	PREDICTED: phosphomevalonate kinase-like [Solanum tuberosum]	--	phosphomevalonate kinase	--	--	--	--	--
Tai6.53518	0.497189	0.431141	0.396463	0.610203	0.599738	Biological Process:phosphorelay signal transduction system (GO:0000160),Molecular Function:signal transducer activity (GO:0004871)	histidine-containing phosphotransfer peotein	HPt (histidine-containing phosphotransfer) domain	80.9975	38.0887	24.7861	36.9137	25.9478	PREDICTED: histidine-containing phosphotransfer protein 1-like isoform X1 [Solanum tuberosum]>gi|565399462|ref|XP_006365270.1| PREDICTED: histidine-containing phosphotransfer protein 1-like isoform X2 [Solanum tuberosum]>gi|565399464|ref|XP_006365271.1| PREDICTED: histidine-containing phosphotransfer protein 1-like isoform X3 [Solanum tuberosum]	PREDICTED: Solanum tuberosum histidine-containing phosphotransfer protein 1-like (LOC102590747), transcript variant X3, mRNA	histidine-containing phosphotransfer peotein	Histidine-containing phosphotransfer protein 1 OS=Arabidopsis thaliana GN=AHP1 PE=1 SV=1	Hpt domain//ATP synthase delta (OSCP) subunit//Sucrose synthase	phosphorelay signal transduction system//sucrose metabolic process//signal transduction//starch metabolic process//ATP synthesis coupled proton transport	sucrose synthase activity//proton-transporting ATP synthase activity, rotational mechanism//signal transducer activity	--
Tai6.53517	0.818725	0.611332	0.538309	0.746426	0.728618	Molecular Function:iron ion binding (GO:0005506),Molecular Function:heme binding (GO:0020037),Biological Process:oxidation-reduction process (GO:0055114)	midchain alkane hydroxylase	--	311.534	21.3396	5.71114	1.67303	3.84016	PREDICTED: cytochrome P450 86B1-like [Nicotiana tomentosiformis]	--	--	Alkane hydroxylase MAH1 OS=Arabidopsis thaliana GN=CYP96A15 PE=2 SV=1	Neurotransmitter-gated ion-channel transmembrane region//Cytochrome P450	oxidation-reduction process//ion transport	oxidoreductase activity, acting on paired donors, with incorporation or reduction of molecular oxygen//iron ion binding//heme binding	--
Tai6.53514	1.07516	1.02324	1.13907	1.19183	1.05981	Molecular Function:catalytic activity (GO:0003824),Molecular Function:ATP binding (GO:0005524),Biological Process:metabolic process (GO:0008152),Molecular Function:metal ion binding (GO:0046872)	--	Succinyl-CoA synthetase, beta subunit	109.995	96.6609	103.379	84.7987	88.4358	PREDICTED: succinyl-CoA ligase [ADP-forming] subunit beta, mitochondrial [Nicotiana tomentosiformis]	PREDICTED: Nicotiana sylvestris succinyl-CoA ligase [ADP-forming] subunit beta, mitochondrial (LOC104238071), mRNA	succinyl-CoA synthetase beta subunit	Succinyl-CoA ligase [ADP-forming] subunit beta, mitochondrial OS=Solanum lycopersicum PE=1 SV=1	Phosphotransferase system, EIIC//Phenol-soluble modulin alpha 4 peptide	phosphoenolpyruvate-dependent sugar phosphotransferase system//carbohydrate transport//pathogenesis	protein-N(PI)-phosphohistidine-sugar phosphotransferase activity	Succinyl-CoA synthetase, beta subunit
Tai6.53484	0.748569	0.549538	0.463232	0	0	Molecular Function:protein kinase activity (GO:0004672),Molecular Function:protein tyrosine kinase activity (GO:0004713),Molecular Function:ATP binding (GO:0005524),Biological Process:protein phosphorylation (GO:0006468)	pto-interacting protein 1	Serine/threonine protein kinase	47.2062	52.0802	52.9333	44.3352	40.7301	PREDICTED: PTI1-like tyrosine-protein kinase 1 isoform X1 [Nicotiana sylvestris]	PREDICTED: Sesamum indicum PTI1-like tyrosine-protein kinase 3 (LOC105158758), transcript variant X3, mRNA	pto-interacting protein 1	PTI1-like tyrosine-protein kinase 3 OS=Arabidopsis thaliana GN=PTI13 PE=1 SV=1	Protein tyrosine kinase//Protein kinase domain	protein phosphorylation	protein kinase activity//ATP binding	--
Tai6.53446	1.31026	1.3641	1.11771	1.1451	1	--	neutral ceramidase	--	6.9559	15.143	13.6265	14.5282	14.6322	PREDICTED: neutral ceramidase-like [Nicotiana sylvestris]	Solanum lycopersicum cDNA, clone: LEFL2001BB05, HTC in fruit	neutral ceramidase	Neutral ceramidase OS=Oryza sativa subsp. japonica GN=Os01g0624000 PE=1 SV=1	--	--	--	Ceramidases
Tai6.5342	1.04847	0.90025	0.552846	0	0	Molecular Function:zinc ion binding (GO:0008270)	zinc finger SWIM domain-containing protein 3	--	0.751298	0.663559	0.56271	0.808056	0.735807	PREDICTED: protein FAR-RED ELONGATED HYPOCOTYL 3 isoform X1 [Nicotiana tomentosiformis]	PREDICTED: Solanum tuberosum protein FAR-RED ELONGATED HYPOCOTYL 3-like (LOC102598983), transcript variant X4, mRNA	--	Protein FAR-RED ELONGATED HYPOCOTYL 3 OS=Arabidopsis thaliana GN=FHY3 PE=1 SV=1	SWIM zinc finger	--	zinc ion binding	--
Tai6.53415	0.333333	0	0.414841	0.777096	0.811861	Molecular Function:protein binding (GO:0005515)	ankyrin	Ankyrin repeat	300.354	301.702	339.413	268.475	301.4	hypothetical protein OsI_30076 [Oryza sativa Indica Group]	PREDICTED: Nicotiana sylvestris ankyrin repeat domain-containing protein 2-like (LOC104242369), mRNA	--	Tankyrase-2 OS=Mus musculus GN=Tnks2 PE=2 SV=2	Ankyrin repeat//Ankyrin repeat	--	protein binding	Ankyrin
Tai6.53406	1.02141	1.77421	1.55023	1.9164	1.52963	Molecular Function:ATP binding (GO:0005524),Cellular Component:membrane (GO:0016020),Biological Process:protein import (GO:0017038)	preprotein translocase subunit SecA	Preprotein translocase subunit SecA (ATPase, RNA helicase)	24.9756	32.3659	49.9999	75.5041	60.5992	PREDICTED: protein translocase subunit SECA1, chloroplastic [Nicotiana sylvestris]	--	preprotein translocase subunit SecA	Protein translocase subunit SECA1, chloroplastic OS=Arabidopsis thaliana GN=SECA1 PE=2 SV=2	SecA DEAD-like domain//Phycobilisome protein	photosynthesis//protein import	ATP binding	--
Tai6.53367	1.03447	1.00553	0.868371	0.911803	1.04215	Biological Process:intracellular protein transport (GO:0006886),Biological Process:vesicle-mediated transport (GO:0016192),Cellular Component:membrane coat (GO:0030117)	coatomer protein complex, subunit gamma	--	66.2253	83.7393	99.6245	100.372	102.695	PREDICTED: coatomer subunit gamma [Beta vulgaris subsp. vulgaris]>gi|870848168|gb|KMT00457.1| hypothetical protein BVRB_9g217580 [Beta vulgaris subsp. vulgaris]	PREDICTED: Solanum tuberosum coatomer subunit gamma-like (LOC102583052), mRNA	coatomer protein complex, subunit gamma	Coatomer subunit gamma-2 OS=Oryza sativa subsp. japonica GN=Os07g0201100 PE=2 SV=1	HEAT repeat//Armadillo/beta-catenin-like repeat//Adaptin N terminal region	intracellular protein transport//vesicle-mediated transport	protein binding	Vesicle coat complex COPI, gamma subunit
Tai6.53362	1.02067	0.694487	0.326697	0	0	--	--	Uncharacterized membrane protein	20.8349	17.9562	17.8107	11.6541	11.0416	hypothetical protein CICLE_v10026316mg [Citrus clementina]>gi|568820029|ref|XP_006464534.1| PREDICTED: uncharacterized protein LOC102610617 [Citrus sinensis]>gi|557529891|gb|ESR41141.1| hypothetical protein CICLE_v10026316mg [Citrus clementina]>gi|641838193|gb|KDO57139.1| hypothetical protein CISIN_1g025129mg [Citrus sinensis]	PREDICTED: Nicotiana tomentosiformis uncharacterized LOC104091604 (LOC104091604), mRNA	--	Protein LIKE COV 2 OS=Arabidopsis thaliana GN=LCV2 PE=2 SV=1	--	--	--	--
Tai6.53320	0.333333	0	0.323521	0.819804	0.902171	--	starch synthase	Membrane protein involved in colicin uptake	1.02263	2.41532	4.12896	4.03036	2.38029	PREDICTED: probable starch synthase 4, chloroplastic/amyloplastic [Malus domestica]	PREDICTED: Sesamum indicum probable starch synthase 4, chloroplastic/amyloplastic (LOC105173754), transcript variant X2, mRNA	starch synthase	Starch synthase 3, chloroplastic/amyloplastic OS=Arabidopsis thaliana GN=SS3 PE=1 SV=1	--	--	--	--
Tai6.53291	0.333333	0	0.463542	1.18189	1.22556	--	--	DNA-binding beta-propeller fold protein YncE	0.0782469	0.293187	0.160176	0.0921434	0.245789	PREDICTED: uncharacterized protein LOC101495603 [Cicer arietinum]	--	--	--	--	--	--	--
Tai6.5328	0.981061	1.05303	1.0939	1.06088	1.23901	--	1,4-alpha-glucan branching enzyme	1,4-alpha-glucan branching enzyme	1.69065	14.8916	11.9707	8.77906	17.0241	starch branching enzyme II [Ipomoea batatas]	Ipomoea batatas SBE II mRNA for starch branching enzyme II, complete cds	1,4-alpha-glucan branching enzyme	1,4-alpha-glucan-branching enzyme 2-2, chloroplastic/amyloplastic OS=Arabidopsis thaliana GN=SBE2.2 PE=2 SV=1	--	--	--	1,4-alpha-glucan branching enzyme/starch branching enzyme II
Tai6.53245	1.07011	0.761735	0.747738	0.39198	0.407853	Cellular Component:Golgi membrane (GO:0000139),Cellular Component:cis-Golgi network (GO:0005801),Biological Process:ER to Golgi vesicle-mediated transport (GO:0006888),Cellular Component:integral component of membrane (GO:0016021)	golgi SNAP receptor complex member 1	--	39.7076	34.8668	36.8651	27.8288	30.6787	PREDICTED: Golgi SNAP receptor complex member 1-2 [Solanum lycopersicum]	PREDICTED: Solanum lycopersicum Golgi SNAP receptor complex member 1-2 (LOC101247066), mRNA	golgi SNAP receptor complex member 1	Golgi SNAP receptor complex member 1-2 OS=Arabidopsis thaliana GN=GOS12 PE=1 SV=2	--	--	--	SNARE protein GS28
Tai6.53237	0.977667	0.619149	0.303873	0	0	--	SET and MYND domain-containing protein	--	17.9455	28.2269	30.2933	25.3648	17.1273	unnamed protein product [Coffea canephora]	PREDICTED: Solanum tuberosum nucleophosmin-like (LOC102585684), mRNA	--	--	Elongation factor G, domain IV//Signal recognition particle 14kD protein	SRP-dependent cotranslational protein targeting to membrane	endoplasmic reticulum signal peptide binding//7S RNA binding//GTP binding	--
Tai6.53230	1.0293	0.855311	0.824443	0.8614	0.853009	Cellular Component:integral component of membrane (GO:0016021)	--	--	45.5313	31.0589	39.3606	33.3838	39.2689	PREDICTED: transmembrane protein 87B-like [Solanum tuberosum]	Ipomoea batatas microsatellite Stv_Ipb_751 sequence	--	Transmembrane protein 87B OS=Mus musculus GN=Tmem87b PE=2 SV=1	Rhodopsin-like GPCR transmembrane domain//Lung seven transmembrane receptor	G-protein coupled receptor signaling pathway//response to pheromone	--	Predicted membrane protein
Tai6.53224	0.333333	0	0.351626	0.872629	1.1521	Biological Process:metabolic process (GO:0008152),Molecular Function:oxidoreductase activity (GO:0016491),Biological Process:oxidation-reduction process (GO:0055114)	aldehyde dehydrogenase (NAD+)	Acyl-CoA reductase or other NAD-dependent aldehyde dehydrogenase	55.1696	39.6142	54.9441	55.7744	47.8252	PREDICTED: aldehyde dehydrogenase family 3 member F1 [Cucumis melo]	--	aldehyde dehydrogenase (NAD+)	Aldehyde dehydrogenase family 3 member F1 OS=Arabidopsis thaliana GN=ALDH3F1 PE=2 SV=2	Aldehyde dehydrogenase family	metabolic process//oxidation-reduction process	oxidoreductase activity	Aldehyde dehydrogenase
Tai6.5314	0.908032	1.56345	0.741365	0	0	Molecular Function:RNA binding (GO:0003723),Molecular Function:translation elongation factor activity (GO:0003746),Biological Process:translational frameshifting (GO:0006452),Molecular Function:ribosome binding (GO:0043022),Biological Process:positive regulation of translational elongation (GO:0045901),Biological Process:positive regulation of translational termination (GO:0045905)	translation initiation factor 5A	Translation elongation factor P (EF-P)/translation initiation factor 5A (eIF-5A)	0.0538405	0.157683	0.213204	0	0.0573516	Eukaryotic translation initiation factor 5A-1 [Theobroma cacao]>gi|802592283|ref|XP_012071499.1| PREDICTED: eukaryotic translation initiation factor 5A [Jatropha curcas]>gi|508782306|gb|EOY29562.1| Eukaryotic translation initiation factor 5A-1 [Theobroma cacao]>gi|643731386|gb|KDP38674.1| hypothetical protein JCGZ_04027 [Jatropha curcas]	PREDICTED: Nelumbo nucifera eukaryotic translation initiation factor 5A (LOC104603299), mRNA	translation initiation factor 5A	Eukaryotic translation initiation factor 5A-2 OS=Nicotiana plumbaginifolia GN=EIF-5A2 PE=2 SV=1	Eukaryotic elongation factor 5A hypusine, DNA-binding OB fold	translational frameshifting//positive regulation of translational elongation//regulation of translational elongation//positive regulation of translational termination	ribosome binding//RNA binding//translation elongation factor activity	Translation initiation factor 5A (eIF-5A)
Tai6.53120	1.38406	0.575362	0.539112	0.398872	0.41563	Biological Process:intracellular protein transport (GO:0006886)	hepatocyte growth factor-regulated tyrosine kinase substrate	--	134.896	123.229	104.892	99.6261	100.993	PREDICTED: TOM1-like protein 2 [Sesamum indicum]	PREDICTED: Sesamum indicum TOM1-like protein 2 (LOC105166826), mRNA	--	Hepatocyte growth factor-regulated tyrosine kinase substrate OS=Homo sapiens GN=HGS PE=1 SV=1	VHS domain	intracellular protein transport	--	Cytosolic sorting protein GGA2/TOM1
Tai6.5311	1.06557	0.989664	0.771632	0.777429	0.736155	Molecular Function:DNA binding (GO:0003677),Molecular Function:DNA-directed 5'-3' RNA polymerase activity (GO:0003899),Molecular Function:ribonucleoside binding (GO:0032549)	DNA-directed RNA polymerase IV and V subunit 2	DNA-directed RNA polymerase, beta subunit/140 kD subunit	32.8691	50.3888	43.5572	57.0216	51.623	PREDICTED: DNA-directed RNA polymerases IV and V subunit 2 isoform X1 [Nicotiana sylvestris]	PREDICTED: Vitis vinifera DNA-directed RNA polymerases IV and V subunit 2-like (LOC100256013), transcript variant X2, mRNA	DNA-directed RNA polymerase IV and V subunit 2	DNA-directed RNA polymerases IV and V subunit 2 OS=Arabidopsis thaliana GN=NRPD2 PE=1 SV=1	PGAP1-like protein//RNA polymerase beta subunit//RNA polymerase Rpb2, domain 2//RNA polymerase Rpb2, domain 4//RNA polymerase Rpb2, domain 6//RNA polymerase Rpb2, domain 5//RNA polymerase Rpb2, domain 3	intracellular protein transport//transcription, DNA-templated//purine nucleobase metabolic process//GPI anchor metabolic process//pyrimidine nucleobase metabolic process	DNA binding//DNA-directed RNA polymerase activity//hydrolase activity, acting on ester bonds	RNA polymerase II, second largest subunit
Tai6.53026	1.22539	1.0688	0.746484	0	0	--	nucleolar protein 4	--	65.2673	53.6203	71.0503	59.2015	56.708	PREDICTED: RNA-binding protein 28-like [Solanum tuberosum]	Arabidopsis thaliana RNA recognition motif-containing protein mRNA, complete cds	nucleolar protein 4	RNA-binding protein 28 OS=Homo sapiens GN=RBM28 PE=1 SV=3	Synaptobrevin//RNA recognition motif. (a.k.a. RRM, RBD, or RNP domain)	vesicle-mediated transport	nucleic acid binding	--
Tai6.53025	1.27481	0.807324	1.01493	0.953851	0.848457	--	alpha-N-arabinofuranosidase	Alpha-L-arabinofuranosidase	27.9437	29.1328	26.1651	34.3999	22.2459	PREDICTED: alpha-L-arabinofuranosidase 1-like [Nicotiana sylvestris]	PREDICTED: Nicotiana sylvestris alpha-L-arabinofuranosidase 1-like (LOC104249616), transcript variant X9, mRNA	alpha-N-arabinofuranosidase	Alpha-L-arabinofuranosidase 1 OS=Arabidopsis thaliana GN=ASD1 PE=1 SV=1	Photosystem II reaction centre N protein (psbN)	photosynthesis	--	--
Tai6.53024	0.333333	0	0.352524	1.32499	1.32624	--	--	--	26.856	34.9655	30.0767	31.6742	33.3012	PREDICTED: uncharacterized protein LOC102604479 [Solanum tuberosum]	PREDICTED: Nicotiana sylvestris uncharacterized LOC104220494 (LOC104220494), transcript variant X3, mRNA	--	--	--	--	--	--
Tai6.52986	1.15866	1.02063	0.666667	0	0	Cellular Component:exocyst (GO:0000145),Biological Process:exocytosis (GO:0006887)	exocyst complex component 3	--	61.593	51.4909	59.5758	57.1668	56.1478	PREDICTED: exocyst complex component SEC6 [Erythranthe guttatus]>gi|604344962|gb|EYU43608.1| hypothetical protein MIMGU_mgv1a001835mg [Erythranthe guttata]	PREDICTED: Nicotiana sylvestris exocyst complex component SEC6 (LOC104230017), transcript variant X3, mRNA	exocyst complex component 3	Exocyst complex component SEC6 OS=Arabidopsis thaliana GN=SEC6 PE=1 SV=1	Integrase Zinc binding domain//Exocyst complex component Sec6	exocytosis	zinc ion binding	--
Tai6.52978	1.0331	0.946247	0.642412	0	0	Molecular Function:electron carrier activity (GO:0009055)	--	--	8.00406	6.7038	5.86025	4.27239	4.70061	PREDICTED: early nodulin-like protein 1 [Nicotiana sylvestris]	--	--	Protein disulfide-isomerase 5-3 OS=Arabidopsis thaliana GN=PDIL5-3 PE=2 SV=1	Liver-expressed antimicrobial peptide 2 precursor (LEAP-2)	defense response to bacterium	--	--
Tai6.52962	0.663172	0.625382	0.689348	0.596513	0.520269	--	--	--	0.167408	0	0	0	0.0609094	PREDICTED: transmembrane protein 53-like isoform X5 [Nicotiana tomentosiformis]	--	--	Transmembrane protein 53 OS=Danio rerio GN=tmem53 PE=2 SV=1	--	--	--	Uncharacterized conserved protein
Tai6.52956	1.05436	1.13427	1.08826	1.2874	1.01974	--	--	--	69.5812	53.817	53.7919	61.1428	62.5796	Uncharacterized protein isoform 1 [Theobroma cacao]>gi|590586473|ref|XP_007015715.1| Uncharacterized protein isoform 1 [Theobroma cacao]>gi|508786077|gb|EOY33333.1| Uncharacterized protein isoform 1 [Theobroma cacao]>gi|508786078|gb|EOY33334.1| Uncharacterized protein isoform 1 [Theobroma cacao]	Theobroma cacao Uncharacterized protein isoform 1 (TCM_041290) mRNA, complete cds	--	--	--	--	--	--
Tai6.52926	0.894314	0.578818	0.55057	0.803465	0.692009	--	molecular chaperone DnaJ	DnaJ-class molecular chaperone with C-terminal Zn finger domain	9.05454	12.3919	16.7557	14.127	14.1923	PREDICTED: dnaJ homolog 1, mitochondrial [Sesamum indicum]	PREDICTED: Nelumbo nucifera dnaJ homolog subfamily A member 2 (LOC104592493), mRNA	molecular chaperone DnaJ	Chaperone protein DnaJ 1 OS=Synechocystis sp. (strain PCC 6803 / Kazusa) GN=dnaJ1 PE=3 SV=1	--	--	--	Molecular chaperone (DnaJ superfamily)
Tai6.5288	0.941998	1.37129	0.55102	0	0	--	auxin influx carrier (AUX1 LAX family)	--	9.07425	9.21208	9.30283	7.79821	6.55257	unnamed protein product [Coffea canephora]	Theobroma cacao Transmembrane amino acid transporter family protein isoform 1 (TCM_021727) mRNA, complete cds	auxin influx carrier (AUX1 LAX family)	Auxin transporter-like protein 2 OS=Medicago truncatula GN=LAX2 PE=2 SV=1	--	--	--	--
Tai6.5286	1.08526	0.924179	1.17939	1.21807	1.26787	Molecular Function:starch binding (GO:2001070)	phosphoglucan, water dikinase	Glycosidase	3.31259	13.9709	3.57891	3.31762	4.43364	PREDICTED: uncharacterized protein LOC104085387 [Nicotiana tomentosiformis]	--	--	Phosphoglucan, water dikinase, chloroplastic OS=Arabidopsis thaliana GN=GWD3 PE=1 SV=1	Starch binding domain	--	starch binding	--
Tai6.52851	0.660369	0.629933	0.694715	0.896386	0.606693	Molecular Function:serine-type endopeptidase inhibitor activity (GO:0004867),Biological Process:response to wounding (GO:0009611)	--	--	14.4617	612.06	482.124	683.071	198.767	proteinase inhibitor SPLTI-a [Ipomoea batatas]	Ipomoea batatas proteinase inhibitor SPLTI-a mRNA, complete cds	--	Inhibitor of trypsin and hageman factor OS=Cucurbita maxima PE=1 SV=1	Potato inhibitor I family	response to wounding	serine-type endopeptidase inhibitor activity	--
Tai6.52833	0.820486	1.18397	0.736211	0	0	--	--	--	11.1521	11.505	8.26103	8.19009	8.50283	PREDICTED: PCI domain-containing protein 2-like [Solanum tuberosum]	PREDICTED: Nicotiana sylvestris PCI domain-containing protein 2 (LOC104243095), mRNA	--	PCI domain-containing protein 2 OS=Bos taurus GN=PCID2 PE=2 SV=1	Birnavirus VP3 protein	--	structural molecule activity	Transcription-associated recombination protein - Thp1p
Tai6.52820	0.957189	0.753904	0.683629	0.715935	0.763151	--	ATP-dependent DNA helicase RecG	--	13.3591	12.6028	14.6135	16.2913	14.4494	PREDICTED: uncharacterized protein LOC102606239 isoform X2 [Solanum tuberosum]	--	--	Nuclear pore complex protein NUP1 OS=Arabidopsis thaliana GN=NUP1 PE=1 SV=1	--	--	--	--
Tai6.52812	1.17019	0.73781	0.545232	0	0	Molecular Function:protein binding (GO:0005515)	F-box and leucine-rich repeat protein 1 (S-phase kinase-associated protein 2)	Leucine-rich repeat (LRR) protein	56.2942	62.9022	56.9905	81.4674	61.3611	PREDICTED: F-box protein SKP2A-like isoform X2 [Nicotiana tomentosiformis]	Hordeum vulgare subsp. vulgare mRNA for predicted protein, complete cds, clone: NIASHv1071A02	F-box and leucine-rich repeat protein 1 (S-phase kinase-associated protein 2)	F-box protein SKP2A OS=Arabidopsis thaliana GN=SKP2A PE=1 SV=1	Leucine Rich Repeat//F-box domain//F-box-like//Leucine Rich repeat//Leucine rich repeat	--	protein binding	F-box protein containing LRR
Tai6.5279	1.07994	0.614159	0.79491	1.53505	1.54745	--	high mobility group protein B1	--	0.0817153	0.0848941	0.0812788	0	0	PREDICTED: high mobility group B protein 1 [Nicotiana sylvestris]>gi|698565248|ref|XP_009773210.1| PREDICTED: high mobility group B protein 1 [Nicotiana sylvestris]	PREDICTED: Nicotiana tomentosiformis high mobility group B protein 1 (LOC104086100), transcript variant X1, mRNA	high mobility group protein B1	High mobility group B protein 1 OS=Arabidopsis thaliana GN=HMGB1 PE=1 SV=1	YABBY protein	multicellular organismal development	--	--
Tai6.52784	0.797721	0.655983	0.446106	0	0	Molecular Function:DNA-directed 5'-3' RNA polymerase activity (GO:0003899),Cellular Component:nucleus (GO:0005634),Molecular Function:zinc ion binding (GO:0008270)	DNA-directed RNA polymerase I subunit RPA1	--	8.04945	12.2388	13.8853	15.0816	14.2249	unnamed protein product [Coffea canephora]	--	DNA-directed RNA polymerase I subunit RPA1	--	--	--	--	--
Tai6.52768	0.933033	0.916517	0.553153	0	0	Molecular Function:iron ion binding (GO:0005506),Molecular Function:heme binding (GO:0020037),Biological Process:oxidation-reduction process (GO:0055114)	--	Cytochrome P450	44.5961	3.24779	6.11751	10.0772	14.9002	PREDICTED: cytochrome P450 81E8-like [Erythranthe guttatus]>gi|604345956|gb|EYU44453.1| hypothetical protein MIMGU_mgv1a005075mg [Erythranthe guttata]	--	isoflavone 2'-hydroxylase	Cytochrome P450 81D11 OS=Arabidopsis thaliana GN=CYP81D11 PE=2 SV=1	Cytochrome P450	oxidation-reduction process	heme binding//iron ion binding//oxidoreductase activity, acting on paired donors, with incorporation or reduction of molecular oxygen	--
Tai6.52767	0.616299	0.321307	0.194397	0	0	Biological Process:metabolic process (GO:0008152)	--	1-acyl-sn-glycerol-3-phosphate acyltransferase	14.0275	15.9551	11.1136	11.0071	10.0784	PREDICTED: probable 1-acyl-sn-glycerol-3-phosphate acyltransferase 5-like [Solanum tuberosum]	PREDICTED: Solanum lycopersicum probable 1-acyl-sn-glycerol-3-phosphate acyltransferase 5 (LOC101261466), transcript variant X3, mRNA	lysocardiolipin and lysophospholipid acyltransferase	Probable 1-acyl-sn-glycerol-3-phosphate acyltransferase 5 OS=Arabidopsis thaliana GN=LPAT5 PE=2 SV=1	Acyltransferase//Xylosyltransferase C terminal//Divalent cation transporter	metabolic process//chondroitin sulfate biosynthetic process//cation transport//glycosaminoglycan biosynthetic process	cation transmembrane transporter activity//protein xylosyltransferase activity//transferase activity, transferring acyl groups	Lysophosphatidic acid acyltransferase LPAAT and related acyltransferases
Tai6.52761	1.08076	1.32185	1.10424	1.19388	1.15722	Molecular Function:protein binding (GO:0005515),Cellular Component:nucleus (GO:0005634),Molecular Function:zinc ion binding (GO:0008270),Biological Process:histone methylation (GO:0016571),Molecular Function:histone-lysine N-methyltransferase activity (GO:0018024),Biological Process:histone lysine methylation (GO:0034968),Molecular Function:histone binding (GO:0042393)	euchromatic histone-lysine N-methyltransferase	Predicted restriction endonuclease	50.6516	58.1352	55.2204	48.9595	61.8081	PREDICTED: histone-lysine N-methyltransferase, H3 lysine-9 specific SUVH1 [Nicotiana sylvestris]>gi|698498874|ref|XP_009795313.1| PREDICTED: histone-lysine N-methyltransferase, H3 lysine-9 specific SUVH1 [Nicotiana sylvestris]	PREDICTED: Nicotiana sylvestris histone-lysine N-methyltransferase, H3 lysine-9 specific SUVH1-like (LOC104238051), mRNA	euchromatic histone-lysine N-methyltransferase	Histone-lysine N-methyltransferase, H3 lysine-9 specific SUVH1 OS=Nicotiana tabacum GN=SUVH1 PE=1 SV=1	Bunyavirus glycoprotein G1//SET domain//Pre-SET motif//SAD/SRA domain	protein methylation//histone lysine methylation//modulation by virus of host morphology or physiology//lysine catabolic process	histone-lysine N-methyltransferase activity//histone binding//zinc ion binding//protein binding	--
Tai6.52753	0.988368	1.22901	1.04337	1.23295	1.18178	Biological Process:response to stress (GO:0006950)	E3 ubiquitin-protein ligase TTC3	--	8.47354	7.94317	6.37119	5.62236	8.40142	PREDICTED: synaptotagmin-4-like isoform X1 [Solanum tuberosum]>gi|565344842|ref|XP_006339512.1| PREDICTED: synaptotagmin-4-like isoform X2 [Solanum tuberosum]>gi|565344844|ref|XP_006339513.1| PREDICTED: synaptotagmin-4-like isoform X3 [Solanum tuberosum]	PREDICTED: Malus x domestica synaptotagmin-5 (LOC103441551), mRNA	--	--	Secretion system effector C (SseC) like family	pathogenesis	--	--
Tai6.52748	1.15578	0.548471	0.369362	0	0	Molecular Function:polygalacturonate 4-alpha-galacturonosyltransferase activity (GO:0047262)	alpha-1,4-galacturonosyltransferase	--	11.8599	15.508	20.708	28.2257	26.6916	PREDICTED: probable galacturonosyltransferase 7 isoform X2 [Nicotiana tomentosiformis]	--	--	--	--	--	--	--
Tai6.52747	1.13409	0.713787	0.478767	0	0	Cellular Component:membrane (GO:0016020),Molecular Function:cellulose synthase (UDP-forming) activity (GO:0016760),Biological Process:cellulose biosynthetic process (GO:0030244)	1,4-beta-D-xylan synthase	Glycosyltransferase, catalytic subunit of cellulose synthase and poly-beta-1,6-N-acetylglucosamine synthase	27.8103	74.556	78.242	131.328	83.3756	PREDICTED: cellulose synthase-like protein D3 [Nicotiana tomentosiformis]>gi|697106767|ref|XP_009607207.1| PREDICTED: cellulose synthase-like protein D3 [Nicotiana tomentosiformis]>gi|697106769|ref|XP_009607208.1| PREDICTED: cellulose synthase-like protein D3 [Nicotiana tomentosiformis]>gi|697106771|ref|XP_009607209.1| PREDICTED: cellulose synthase-like protein D3 [Nicotiana tomentosiformis]>gi|6…	PREDICTED: Nicotiana sylvestris cellulose synthase-like protein D3 (LOC104239165), transcript variant X6, mRNA	--	Cellulose synthase-like protein D3 OS=Arabidopsis thaliana GN=CSLD3 PE=1 SV=1	Cellulose synthase	starch metabolic process//cellulose biosynthetic process//sucrose metabolic process//UDP-glucose metabolic process	cellulose synthase (UDP-forming) activity	--
Tai6.5274	1.12059	0.942157	0.551307	0	0	Biological Process:transmembrane transport (GO:0055085)	solute carrier family 25 (mitochondrial phosphate transporter), member 23/24/25/41	--	27.4226	11.5709	13.2538	8.15032	8.87223	unnamed protein product [Vitis vinifera]	PREDICTED: Nicotiana tomentosiformis probable envelope ADP,ATP carrier protein, chloroplastic (LOC104084698), mRNA	solute carrier family 25 (mitochondrial phosphate transporter), member 23/24/25/41	Thylakoid ADP,ATP carrier protein, chloroplastic OS=Arabidopsis thaliana GN=TAAC PE=1 SV=1	--	--	--	Mitochondrial solute carrier protein
Tai6.5271	0.690808	0.781105	0.384865	0	0	--	--	--	0.0461776	0.733162	0.567589	0.141028	0.544133	unnamed protein product [Coffea canephora]	PREDICTED: Sesamum indicum protein LIGHT-DEPENDENT SHORT HYPOCOTYLS 10-like (LOC105179460), mRNA	--	Protein LIGHT-DEPENDENT SHORT HYPOCOTYLS 10 OS=Arabidopsis thaliana GN=LSH10 PE=1 SV=1	--	--	--	--
Tai6.52705	1.01901	1.1981	1.09256	1.07068	0.928304	--	senescence-induced receptor-like serine/threonine-protein kinase	--	46.8126	53.3105	47.3858	58.9494	62.6446	unnamed protein product [Coffea canephora]	PREDICTED: Nicotiana sylvestris probable LRR receptor-like serine/threonine-protein kinase At1g67720 (LOC104210060), mRNA	--	Probable LRR receptor-like serine/threonine-protein kinase At1g67720 OS=Arabidopsis thaliana GN=At1g67720 PE=2 SV=1	--	--	--	--
Tai6.52704	1.05598	1.47685	0.833754	0	0	Molecular Function:protein binding (GO:0005515)	regulatory protein NPR1	Ankyrin repeat	6.25049	18.6009	9.89003	15.9102	14.645	hypothetical protein VITISV_010389 [Vitis vinifera]	Cucumis melo genomic chromosome, chr_4	regulatory protein NPR1	Regulatory protein NPR5 OS=Arabidopsis thaliana GN=NPR5 PE=1 SV=1	Ankyrin repeat//Ankyrin repeat	--	protein binding	--
Tai6.52693	0.969728	1.08163	1.04698	1.09748	1.25038	--	anthranilate synthase component I	Anthranilate/para-aminobenzoate synthases component I	13.0346	22.5724	37.5243	43.3922	39.1804	PREDICTED: anthranilate synthase alpha subunit 2, chloroplastic-like isoform X2 [Nicotiana sylvestris]	PREDICTED: Nicotiana sylvestris anthranilate synthase alpha subunit 2, chloroplastic-like (LOC104248158), transcript variant X2, mRNA	anthranilate synthase component I	Anthranilate synthase alpha subunit 2, chloroplastic OS=Arabidopsis thaliana GN=ASA2 PE=2 SV=1	Anthranilate synthase component I, N terminal region	biosynthetic process	oxo-acid-lyase activity	--
Tai6.52665	1.04171	0.946514	0.559058	0	0	--	formin 2	Type V secretory pathway, adhesin AidA	14.8663	37.5612	36.2257	67.2481	69.8384	PREDICTED: formin-like protein 1 [Solanum lycopersicum]	PREDICTED: Solanum tuberosum formin-like protein 1-like (LOC102591335), mRNA	--	Formin-like protein 1 OS=Arabidopsis thaliana GN=FH1 PE=1 SV=1	--	--	--	--
Tai6.5266	0.939097	0.848485	0.956985	0.870761	0.871983	--	NADH dehydrogenase (ubiquinone) 1 alpha subcomplex subunit 9	Uncharacterized conserved protein YbjT, contains NAD(P)-binding and DUF2867 domains	77.9261	87.9092	77.0043	62.881	72.8163	PREDICTED: NADH dehydrogenase [ubiquinone] 1 alpha subcomplex subunit 9, mitochondrial [Sesamum indicum]	PREDICTED: Nicotiana tomentosiformis NADH dehydrogenase [ubiquinone] 1 alpha subcomplex subunit 9, mitochondrial (LOC104084473), transcript variant X5, mRNA	NADH dehydrogenase (ubiquinone) 1 alpha subcomplex subunit 9	NADH dehydrogenase [ubiquinone] 1 alpha subcomplex subunit 9, mitochondrial OS=Arabidopsis thaliana GN=At2g20360 PE=1 SV=2	'Paired box' domain//3-beta hydroxysteroid dehydrogenase/isomerase family//NAD dependent epimerase/dehydratase family	C21-steroid hormone metabolic process//regulation of transcription, DNA-templated//estrogen metabolic process//androgen metabolic process//oxidation-reduction process//steroid biosynthetic process	coenzyme binding//catalytic activity//oxidoreductase activity, acting on the CH-OH group of donors, NAD or NADP as acceptor//3-beta-hydroxy-delta5-steroid dehydrogenase activity//DNA binding	NADH:ubiquinone oxidoreductase, NDUFA9/39kDa subunit
Tai6.5258	0.875231	1.56331	0.51495	0	0	Cellular Component:intracellular (GO:0005622),Biological Process:transport (GO:0006810)	--	--	54.3443	81.4993	70.4194	75.1902	75.5843	PREDICTED: putative G3BP-like protein isoform X1 [Nicotiana tomentosiformis]	PREDICTED: Nicotiana tomentosiformis putative G3BP-like protein (LOC104087608), transcript variant X2, mRNA	--	--	Quinolinate phosphoribosyl transferase, C-terminal domain//Nuclear transport factor 2 (NTF2) domain	NAD biosynthetic process//transport//nicotinate nucleotide metabolic process	nicotinate-nucleotide diphosphorylase (carboxylating) activity	--
Tai6.5257	1.00349	1.32171	0.776357	0	0	Cellular Component:cytoplasm (GO:0005737),Molecular Function:glycolipid transporter activity (GO:0017089),Biological Process:glycolipid transport (GO:0046836),Molecular Function:glycolipid binding (GO:0051861)	pleckstrin homology domain containing, family A (phosphoinositide binding specific) member 8	--	66.4313	99.5842	128.478	83.8308	81.7244	PREDICTED: pleckstrin homology domain-containing family A member 8-like [Nicotiana tomentosiformis]	PREDICTED: Solanum lycopersicum pleckstrin homology domain-containing family A member 8 (LOC101263423), transcript variant X2, mRNA	--	Glycolipid transfer protein 1 OS=Arabidopsis thaliana GN=GLTP1 PE=2 SV=1	Glycolipid transfer protein (GLTP)	glycolipid transport	glycolipid binding//glycolipid transporter activity	Glycolipid transfer protein
Tai6.5255	0.971762	0.904901	1.05696	1.41335	1.23259	Molecular Function:structural constituent of ribosome (GO:0003735),Cellular Component:intracellular (GO:0005622),Cellular Component:ribosome (GO:0005840),Biological Process:translation (GO:0006412)	large subunit ribosomal protein L14e	Ribosomal protein L14E/L6E/L27E	314.209	285.3	443.979	361.56	306.704	PREDICTED: 60S ribosomal protein L14-1 [Prunus mume]	PREDICTED: Solanum tuberosum probable 60S ribosomal protein L14-like (LOC102593585), mRNA	large subunit ribosomal protein L14e	60S ribosomal protein L14-2 OS=Arabidopsis thaliana GN=RPL14B PE=2 SV=1	Ribosomal protein L14	translation//ribosome biogenesis	structural constituent of ribosome	60S ribosomal protein L14
Tai6.52530	1.13638	1.01688	0.494538	0	0	Molecular Function:transporter activity (GO:0005215),Biological Process:transport (GO:0006810),Cellular Component:membrane (GO:0016020)	aquaporin SIP	Glycerol uptake facilitator and related aquaporins (Major Intrinsic Protein Family)	2.9771	4.04481	1.17329	3.97861	4.15222	PREDICTED: probable aquaporin SIP2-1 isoform X1 [Populus euphratica]	--	aquaporin SIP	Probable aquaporin SIP2-1 OS=Arabidopsis thaliana GN=SIP2-1 PE=2 SV=1	Major intrinsic protein//UbiA prenyltransferase family	transport	transporter activity//prenyltransferase activity	--
Tai6.52528	1.10582	0.883909	0.851759	1.19416	1.15396	Molecular Function:oxidoreductase activity (GO:0016491),Biological Process:oxidation-reduction process (GO:0055114)	--	Xanthine dehydrogenase, molybdopterin-binding subunit B	50.4014	22.9084	30.5045	35.7415	34.2275	unnamed protein product [Coffea canephora]	PREDICTED: Sesamum indicum xanthine dehydrogenase 1-like (LOC105163571), mRNA	xanthine dehydrogenase/oxidase	Xanthine dehydrogenase 1 OS=Arabidopsis thaliana GN=XDH1 PE=1 SV=1	--	--	--	Xanthine dehydrogenase
Tai6.5252	0.928196	0.906305	0.500584	0	0	Molecular Function:structural constituent of ribosome (GO:0003735),Cellular Component:ribosome (GO:0005840),Biological Process:translation (GO:0006412)	large subunit ribosomal protein L23	Ribosomal protein L23	1.90647	2.69348	1.62032	1.76213	2.38612	PREDICTED: uncharacterized protein LOC104094341 isoform X2 [Nicotiana tomentosiformis]	PREDICTED: Erythranthe guttatus uncharacterized LOC105965184 (LOC105965184), mRNA	large subunit ribosomal protein L23	50S ribosomal protein L23 OS=Proteus mirabilis (strain HI4320) GN=rplW PE=3 SV=1	Ribosomal protein L23	translation//ribosome biogenesis	structural constituent of ribosome	--
Tai6.52508	1.03896	0.811951	0.789107	1.08403	1.07531	Molecular Function:glucose-6-phosphate dehydrogenase activity (GO:0004345),Biological Process:glucose metabolic process (GO:0006006),Molecular Function:NADP binding (GO:0050661),Biological Process:oxidation-reduction process (GO:0055114)	--	Glucose-6-phosphate 1-dehydrogenase	52.1398	37.9375	25.1096	28.1867	28.0833	PREDICTED: glucose-6-phosphate 1-dehydrogenase, chloroplastic-like [Sesamum indicum]	Theobroma cacao Glucose-6-phosphate dehydrogenase 2 isoform 2 (TCM_008602) mRNA, complete cds	glucose-6-phosphate 1-dehydrogenase	Glucose-6-phosphate 1-dehydrogenase, chloroplastic OS=Nicotiana tabacum PE=2 SV=1	Glucose-6-phosphate dehydrogenase, C-terminal domain	glutathione metabolic process//glucose metabolic process//oxidation-reduction process//pentose-phosphate shunt	glucose-6-phosphate dehydrogenase activity//NADP binding	Glucose-6-phosphate 1-dehydrogenase
Tai6.52463	0.930132	0.665396	0.75685	0.90613	0.995849	--	NADPH2:quinone reductase	Broad specificity phosphatase PhoE	4.84024	3.26574	2.4637	2.31057	3.37566	PREDICTED: uncharacterized protein LOC104092313 [Nicotiana tomentosiformis]	--	--	--	--	--	--	--
Tai6.52387	0.973586	1.26674	1.01508	0.878551	0.828406	--	--	--	12.2551	12.4951	11.8086	12.2862	11.3301	PREDICTED: CDK5RAP3-like protein [Nicotiana tomentosiformis]	PREDICTED: Cicer arietinum CDK5RAP3-like protein (LOC101498500), mRNA	--	CDK5RAP3-like protein OS=Arabidopsis thaliana GN=At5g06830 PE=2 SV=2	--	--	--	--
Tai6.52374	1.79037	0.711481	0.7604	1.11223	1.24804	Cellular Component:nucleus (GO:0005634),Biological Process:chromatin organization (GO:0006325),Biological Process:developmental process (GO:0032502)	actin-related protein 7, plant	Actin-related protein	86.4536	69.203	75.4045	72.2876	69.7679	PREDICTED: actin-related protein 7 isoform X1 [Nicotiana sylvestris]	PREDICTED: Nicotiana sylvestris actin-related protein 7 (LOC104232416), transcript variant X1, mRNA	actin-related protein 7, plant	Actin-related protein 7 OS=Arabidopsis thaliana GN=ARP7 PE=1 SV=1	--	--	--	Actin and related proteins
Tai6.52361	1.11887	1.14173	1.52867	1.63238	1.7885	--	uncharacterized protein	NADPH-dependent curcumin reductase CurA	103.292	83.249	138.05	105.751	117.613	PREDICTED: 2-alkenal reductase (NADP(+)-dependent)-like [Nicotiana tomentosiformis]	--	uncharacterized protein	2-alkenal reductase (NADP(+)-dependent) OS=Nicotiana tabacum GN=DBR PE=1 SV=1	--	--	--	--
Tai6.52348	0.923831	1.41214	0.680618	0	0	--	mediator of RNA polymerase II transcription subunit 25	--	35.1184	23.4071	22.5194	27.8514	28.808	unnamed protein product [Coffea canephora]	PREDICTED: Fragaria vesca subsp. vesca mediator of RNA polymerase II transcription subunit 25 (LOC101304180), transcript variant X2, mRNA	mediator of RNA polymerase II transcription subunit 25	Mediator of RNA polymerase II transcription subunit 25 OS=Arabidopsis thaliana GN=MED25 PE=1 SV=1	--	--	--	--
Tai6.52338	0.951557	0.579931	0.614648	0.766805	0.812725	--	LIM domain-binding protein 1	--	77.3569	64.9955	62.0495	60.0656	59.819	PREDICTED: transcriptional corepressor SEUSS isoform X2 [Prunus mume]	Populus trichocarpa hypothetical protein (POPTR_0015s13630g) mRNA, complete cds	--	Probable transcriptional regulator SLK2 OS=Arabidopsis thaliana GN=SLK2 PE=1 SV=1	--	--	--	--
Tai6.52325	1.02031	1.09721	1.18746	1.4772	1.32714	Molecular Function:nucleic acid binding (GO:0003676)	ribonucleases P/MRP protein subunit RPP25	--	87.8919	82.2058	63.1594	88.7877	78.6766	unknown [Lotus japonicus]	PREDICTED: Nicotiana tomentosiformis ribonuclease P protein subunit p25-like protein (LOC104097128), mRNA	--	Ribonuclease P protein subunit p25-like protein OS=Mus musculus GN=Rpp25l PE=2 SV=1	Alba//Rpp20 subunit of nuclear RNase MRP and P	regulation of RNA metabolic process//tRNA processing	ribonuclease P activity//nucleic acid binding	--
Tai6.52302	1.03979	0.985958	0.649281	0	0	--	callose synthase	--	18.1827	22.3042	23.4277	20.0387	20.7165	PREDICTED: callose synthase 10 [Solanum lycopersicum]	--	callose synthase	Callose synthase 10 OS=Arabidopsis thaliana GN=CALS10 PE=2 SV=5	--	--	--	--
Tai6.5229	0.955592	0.70148	0.53591	0	0	--	--	Phosphoglycolate phosphatase, HAD superfamily	1.82085	2.12685	1.56715	2.11454	2.43727	PREDICTED: uncharacterized protein LOC105963826 [Erythranthe guttatus]>gi|604321564|gb|EYU32140.1| hypothetical protein MIMGU_mgv1a011795mg [Erythranthe guttata]	PREDICTED: Jatropha curcas uncharacterized LOC105642967 (LOC105642967), transcript variant X1, mRNA	--	--	Ribosomal protein L7/L12 dimerisation domain	translation//ribosome biogenesis	structural constituent of ribosome	--
Tai6.52286	1.25898	0.950431	0.919687	0.506104	0.560108	Molecular Function:ubiquitin-protein transferase activity (GO:0004842)	E3 ubiquitin-protein ligase HUWE1	--	28.5209	16.4872	17.5901	25.3488	27.5892	E3 ubiquitin-protein ligase UPL1, partial [Glycine soja]	PREDICTED: Fragaria vesca subsp. vesca E3 ubiquitin-protein ligase UPL1 (LOC101291412), transcript variant X2, mRNA	E3 ubiquitin-protein ligase HUWE1	E3 ubiquitin-protein ligase UPL1 OS=Arabidopsis thaliana GN=UPL1 PE=1 SV=3	HECT-domain (ubiquitin-transferase)	protein ubiquitination	ubiquitin-protein transferase activity	E3 ubiquitin-protein ligase/Putative upstream regulatory element binding protein
Tai6.52271	0.928898	1.06719	0.881672	0.772513	0.841784	Molecular Function:calcium ion binding (GO:0005509),Cellular Component:endoplasmic reticulum (GO:0005783),Biological Process:protein folding (GO:0006457),Molecular Function:unfolded protein binding (GO:0051082)	calreticulin	--	39.5037	47.8189	51.7062	58.2943	44.4634	PREDICTED: calreticulin [Nelumbo nucifera]	Petunia x hybrida mRNA for calreticulin (phcrt1 gene)	calreticulin	Calreticulin OS=Ricinus communis PE=2 SV=1	CDC45-like protein//Calreticulin family//RNA polymerase III RPC4//Rhabdovirus nucleocapsid protein//DNA-directed RNA polymerase III subunit Rpc31//Nop14-like family//Presenilin//DNA polymerase phi	purine nucleobase metabolic process//transcription from RNA polymerase III promoter//DNA replication//regulation of transcription from RNA polymerase III promoter//transcription, DNA-templated//pyrimidine nucleobase metabolic process//DNA replication initiation//protein folding	unfolded protein binding//DNA binding//DNA-directed DNA polymerase activity//DNA-directed RNA polymerase activity//calcium ion binding//aspartic-type endopeptidase activity	Calreticulin
Tai6.52260	1.02232	1.00303	1.3507	0.941857	1.01817	Biological Process:proteolysis (GO:0006508),Molecular Function:cysteine-type peptidase activity (GO:0008234)	cathepsin H	Cysteine protease, C1A family	1229.21	630.28	959.475	1390.28	1453.24	PREDICTED: thiol protease aleurain-like [Populus euphratica]	Nicotiana benthamiana cysteine proteinase aleuran type mRNA, complete cds	cathepsin H	Cysteine proteinase 3 OS=Solanum lycopersicum GN=CYP-3 PE=2 SV=1	Peptidase C1-like family//Papain family cysteine protease	proteolysis	cysteine-type endopeptidase activity//cysteine-type peptidase activity	Cysteine proteinase Cathepsin L
Tai6.52235	0.95189	0.995002	0.742178	0.586404	0.584922	Molecular Function:oxidoreductase activity (GO:0016491),Biological Process:oxidation-reduction process (GO:0055114)	naringenin 3-dioxygenase	Isopenicillin N synthase and related dioxygenases	469.462	289.943	96.4137	18.6287	73.9207	fravanone 3-hydroxyrase [Ipomoea batatas]	Ipomoea batatas cultivar Yamakawamurasaki flavanone 3-hydroxyrase (F3H) mRNA, complete cds	naringenin 3-dioxygenase	Naringenin,2-oxoglutarate 3-dioxygenase (Fragment) OS=Petunia hybrida GN=AN3 PE=1 SV=1	Baculovirus LEF-11 protein//2OG-Fe(II) oxygenase superfamily	oxidation-reduction process//regulation of transcription, DNA-templated//viral life cycle	oxidoreductase activity	--
Tai6.52211	1.09201	1.69506	1.78729	0.995647	0.789801	--	--	--	423.317	362.287	281.403	300.339	420.133	PREDICTED: reticulon-like protein B2 [Populus euphratica]	PREDICTED: Brassica rapa reticulon-like protein B1 (LOC103834960), mRNA	--	Reticulon-like protein B1 OS=Arabidopsis thaliana GN=RTNLB1 PE=1 SV=1	--	--	--	--
Tai6.52175	1.03421	0.616382	0.657395	0.592144	0.636364	--	--	--	78.067	84.6728	92.25	93.9347	85.6126	PREDICTED: large proline-rich protein BAG6 isoform X1 [Nicotiana tomentosiformis]	--	--	--	--	--	--	--
Tai6.52152	0.333333	0	0.969874	2.84937	3.62293	Biological Process:cell redox homeostasis (GO:0045454),Biological Process:oxidation-reduction process (GO:0055114)	dihydrolipoamide dehydrogenase	Pyruvate/2-oxoglutarate dehydrogenase complex, dihydrolipoamide dehydrogenase (E3) component or related enzyme	42.5171	43.9627	50.0136	54.0432	49.5022	hypothetical protein POPTR_0010s15200g [Populus trichocarpa]>gi|550329856|gb|EEF02195.2| hypothetical protein POPTR_0010s15200g [Populus trichocarpa]	PREDICTED: Nelumbo nucifera dihydrolipoyl dehydrogenase 2, chloroplastic-like (LOC104605099), mRNA	dihydrolipoamide dehydrogenase	Dihydrolipoyl dehydrogenase 2, chloroplastic OS=Arabidopsis thaliana GN=LPD2 PE=2 SV=2	Pyridine nucleotide-disulphide oxidoreductase, dimerisation domain	gluconeogenesis//threonine metabolic process//oxidation-reduction process//L-serine metabolic process//tricarboxylic acid cycle//glycine metabolic process//obsolete electron transport//cell redox homeostasis//glycolytic process	flavin adenine dinucleotide binding//dihydrolipoyl dehydrogenase activity	Dihydrolipoamide dehydrogenase
[truncated: 3,507 more rows]

## Sheet: cell division
Cell division related genes
Gene_id	pro-F	pro-D1	pro-D3	pro-D5	pro-D10	GO_Description	KEGG_Description	COG_Function_Description	RNA-F	RNA-D1	RNA-D3	RNA-D5	RNA-D10	NR Description	NT Description	KO Description	Swissprot Description	PFAM description	BP Description	MF Description	KOG Description
cell division protein
[truncated: 16 more rows]

## Sheet: starch
Starch biosynthetic genes
[truncated: 15 more rows]

## Sheet: IAA
IAA biosynthetic genes
[truncated: 3 more rows]

## Sheet: CTK
CTK biosynthetic genes
[truncated: 3 more rows]

## Sheet: ABA
ABA biosynthetic genes
[truncated: 9 more rows]

## Sheet: JA
JA biosynthetic genes
[truncated: 7 more rows]

## Sheet: GA
GAs biosynthetic genes
[truncated: 12 more rows]

## Sheet: homeobox
homeobox transcription factors
[truncated: 16 more rows]

## Sheet: myb
MYB transcription factors
[truncated: 9 more rows]

[truncated: 2 more sheets: bzip, NAC]
